# Supplementary material for: Carbyne decorated porphyrins
Source: Royal Society of Chemistry journal article supplement (doi:10.1039/d0dt02809f), 2020-01-01
Supplement: d0dt02809f1.pdf [file d0dt02809f1.pdf]

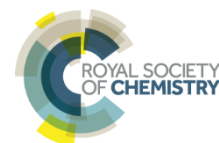

## Dalton Transactions

### ARTICLE

#### Electronic Supporting Information for:

#### Carbyne Decorated Porphyrins

Benjamin J. Frogley,<sup>a</sup> Anthony F. Hill<sup>a†</sup>

#### Selected NMR, IR and Electronic spectra

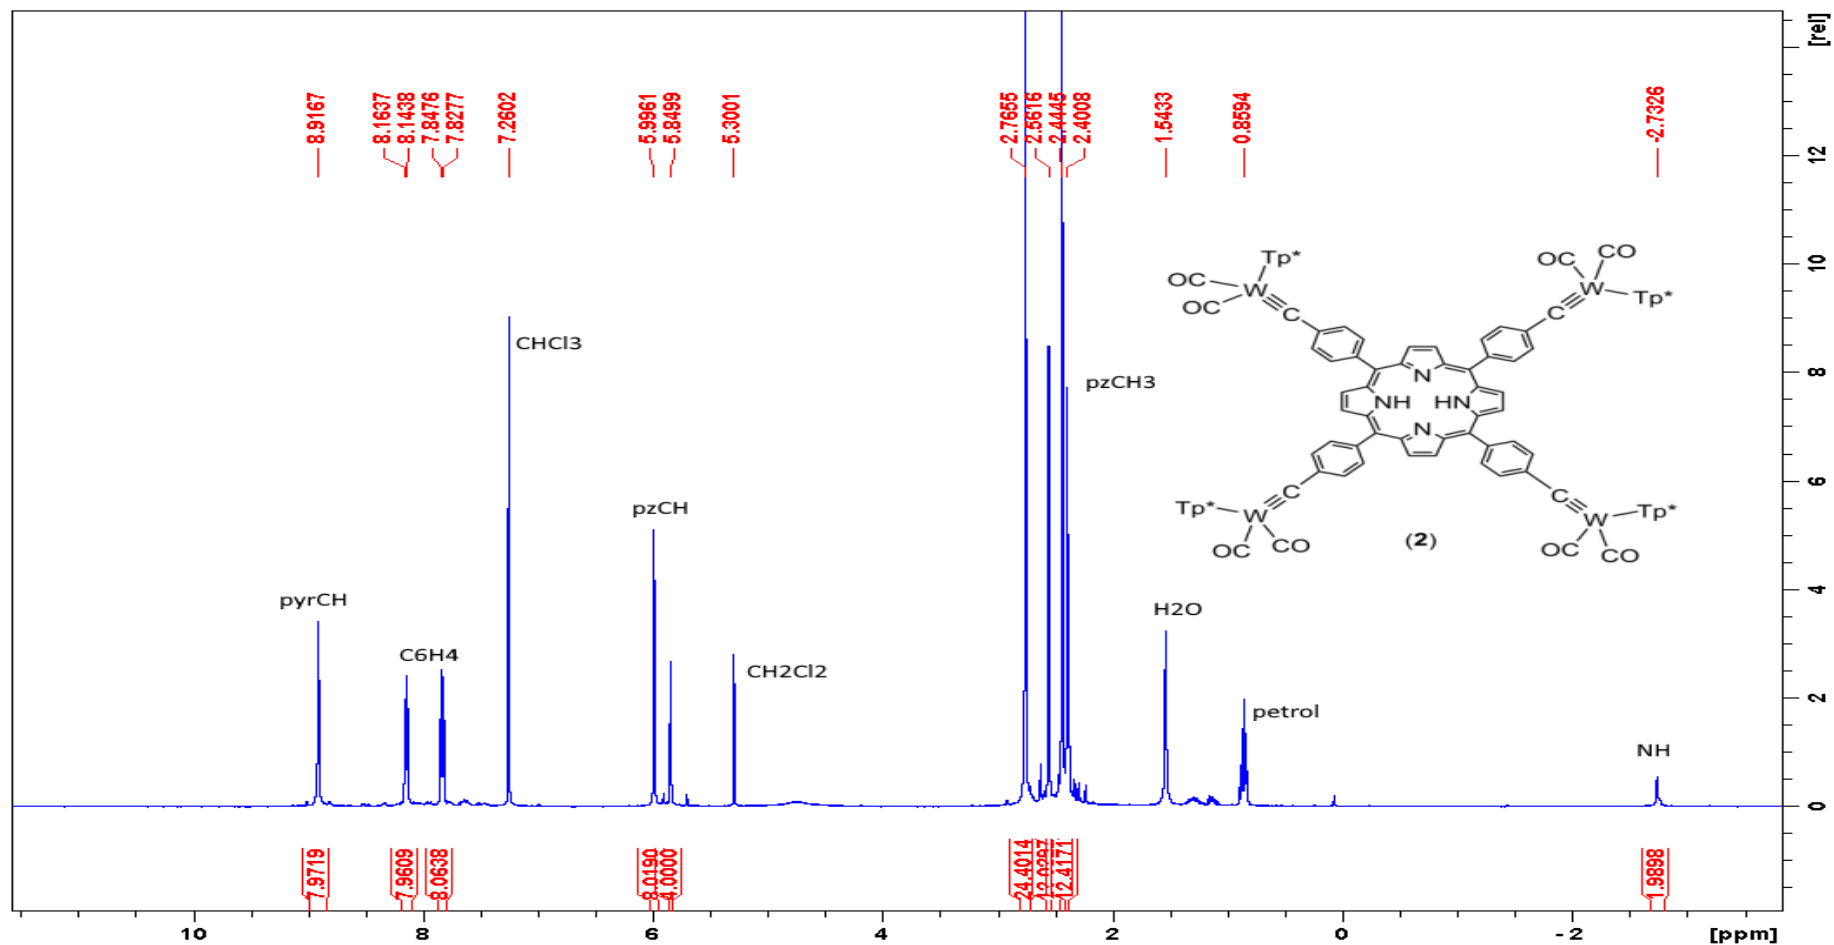

**Figure S1.**  $^1\text{H}$  NMR spectrum (400 MHz,  $\text{CDCl}_3$ , 25  $^\circ\text{C}$ ,  $\delta$ ) of **2**.

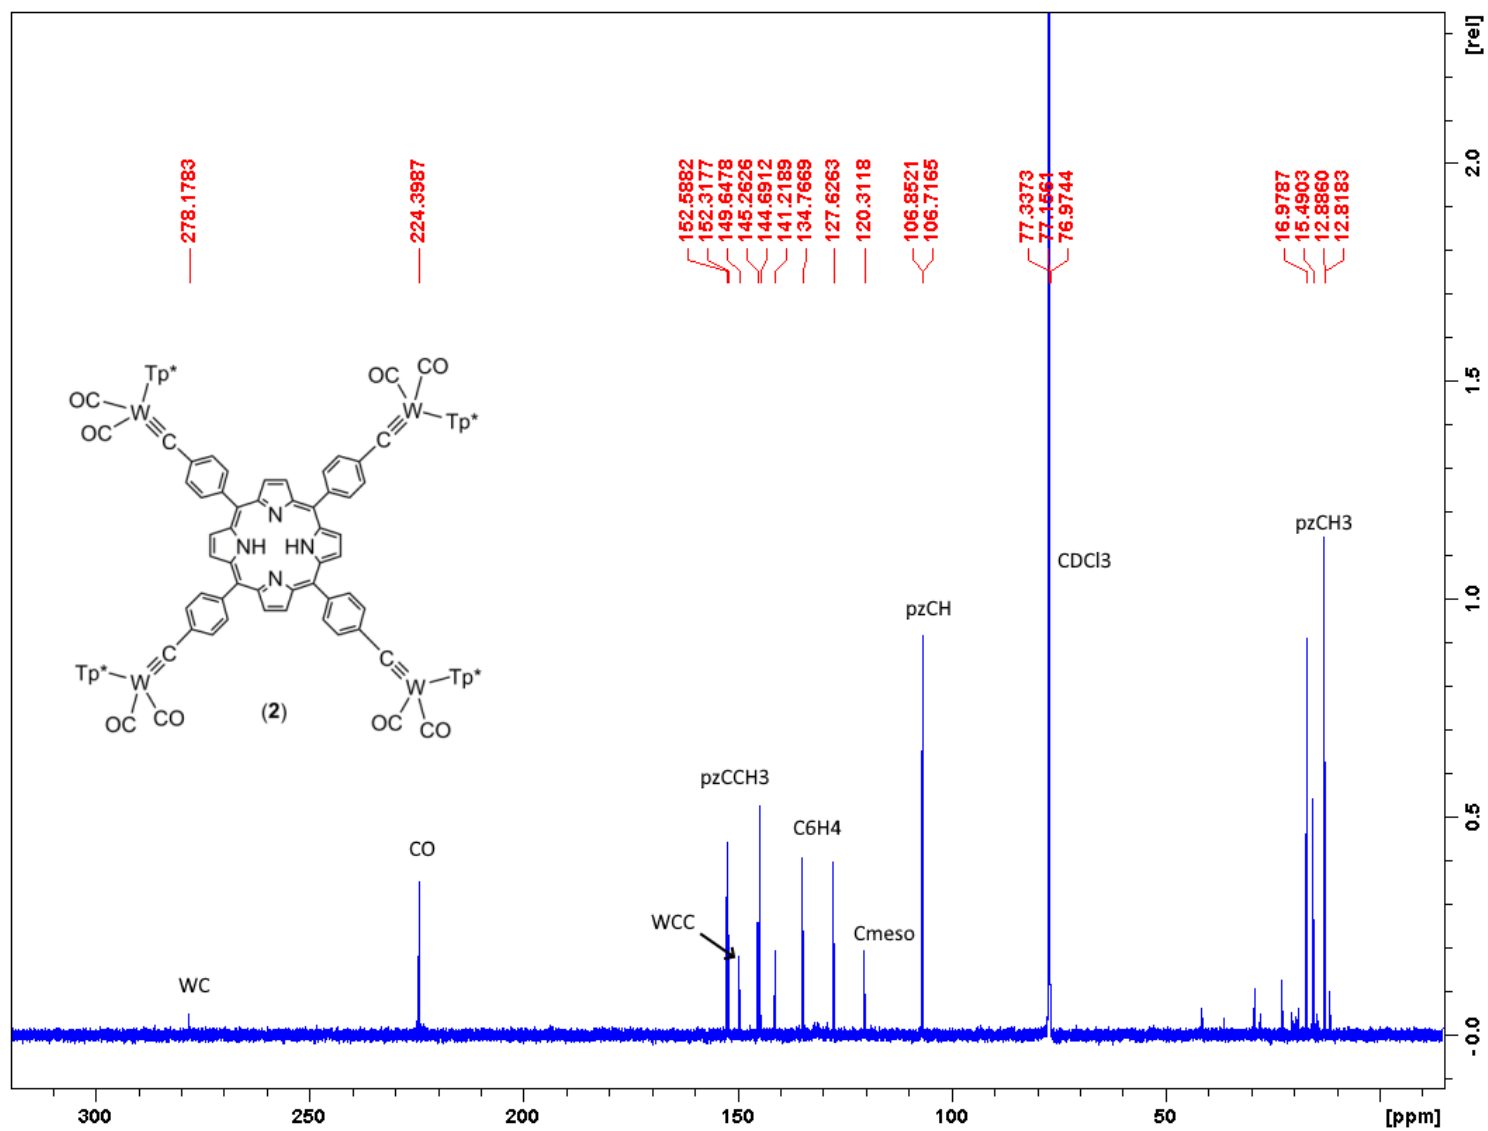

**Figure S2.**  $^{13}\text{C}\{^1\text{H}\}$  NMR spectrum (151 MHz,  $\text{CDCl}_3$ , 25 °C,  $\delta$ ) of **2**.

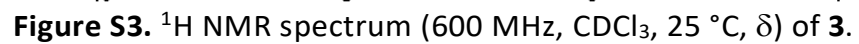

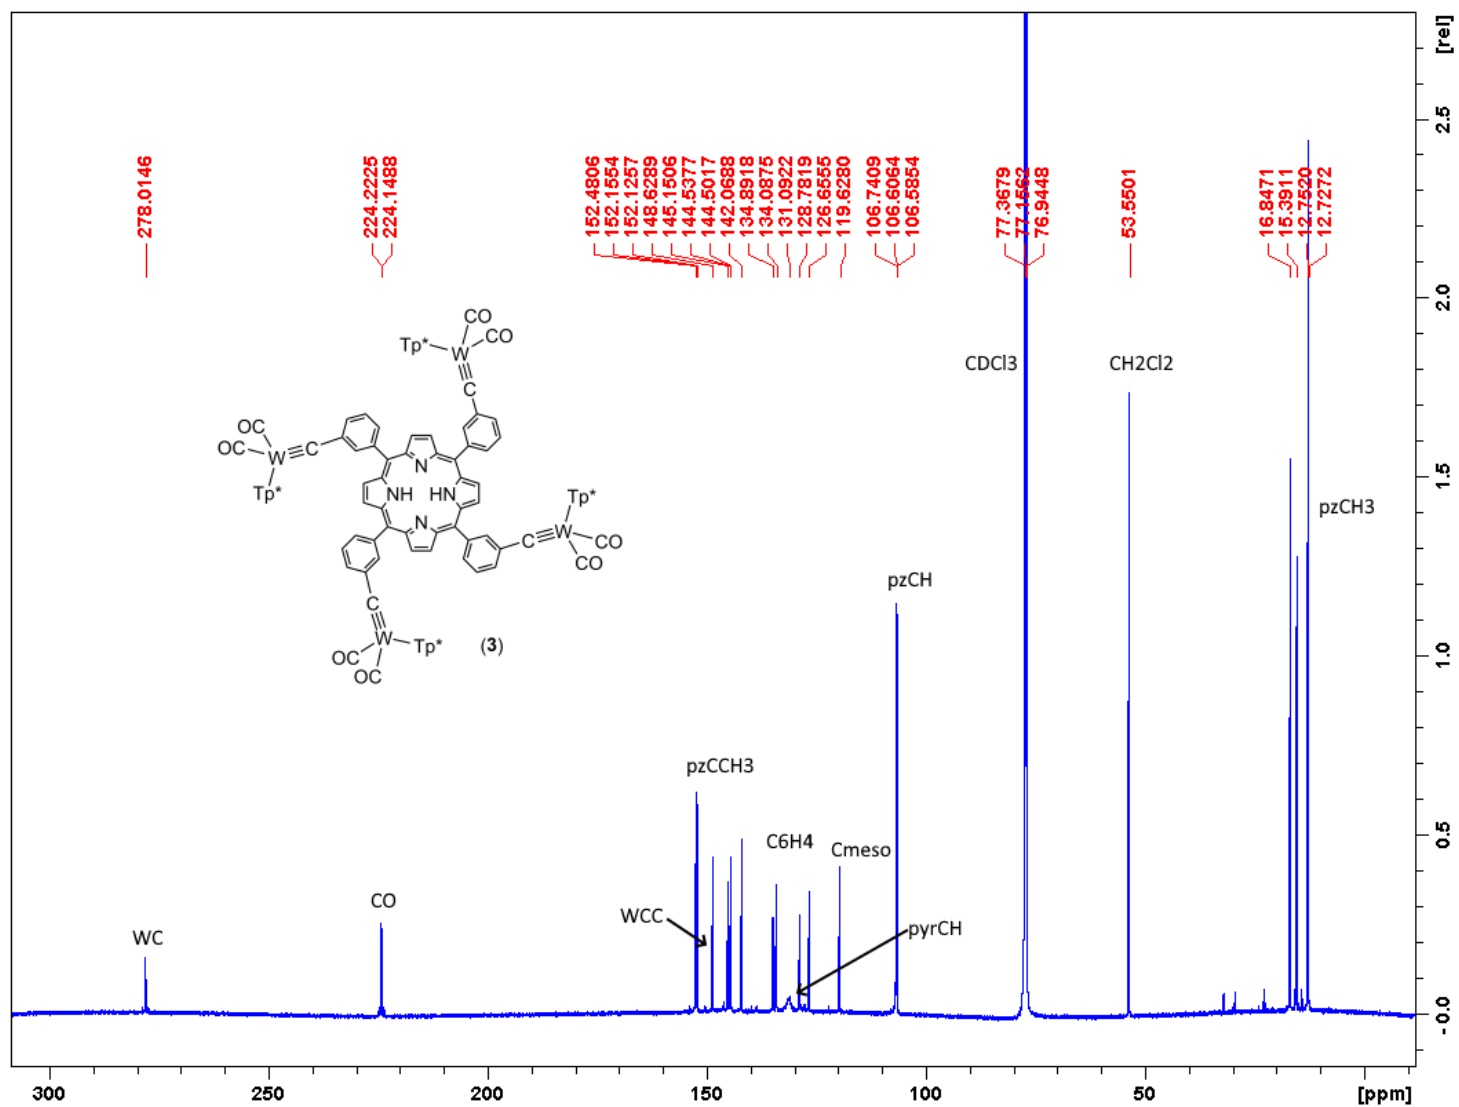

**Figure S4.**  $^{13}\text{C}\{^1\text{H}\}$  NMR spectrum (151 MHz,  $\text{CDCl}_3$ , 25 °C,  $\delta$ ) of **3**.

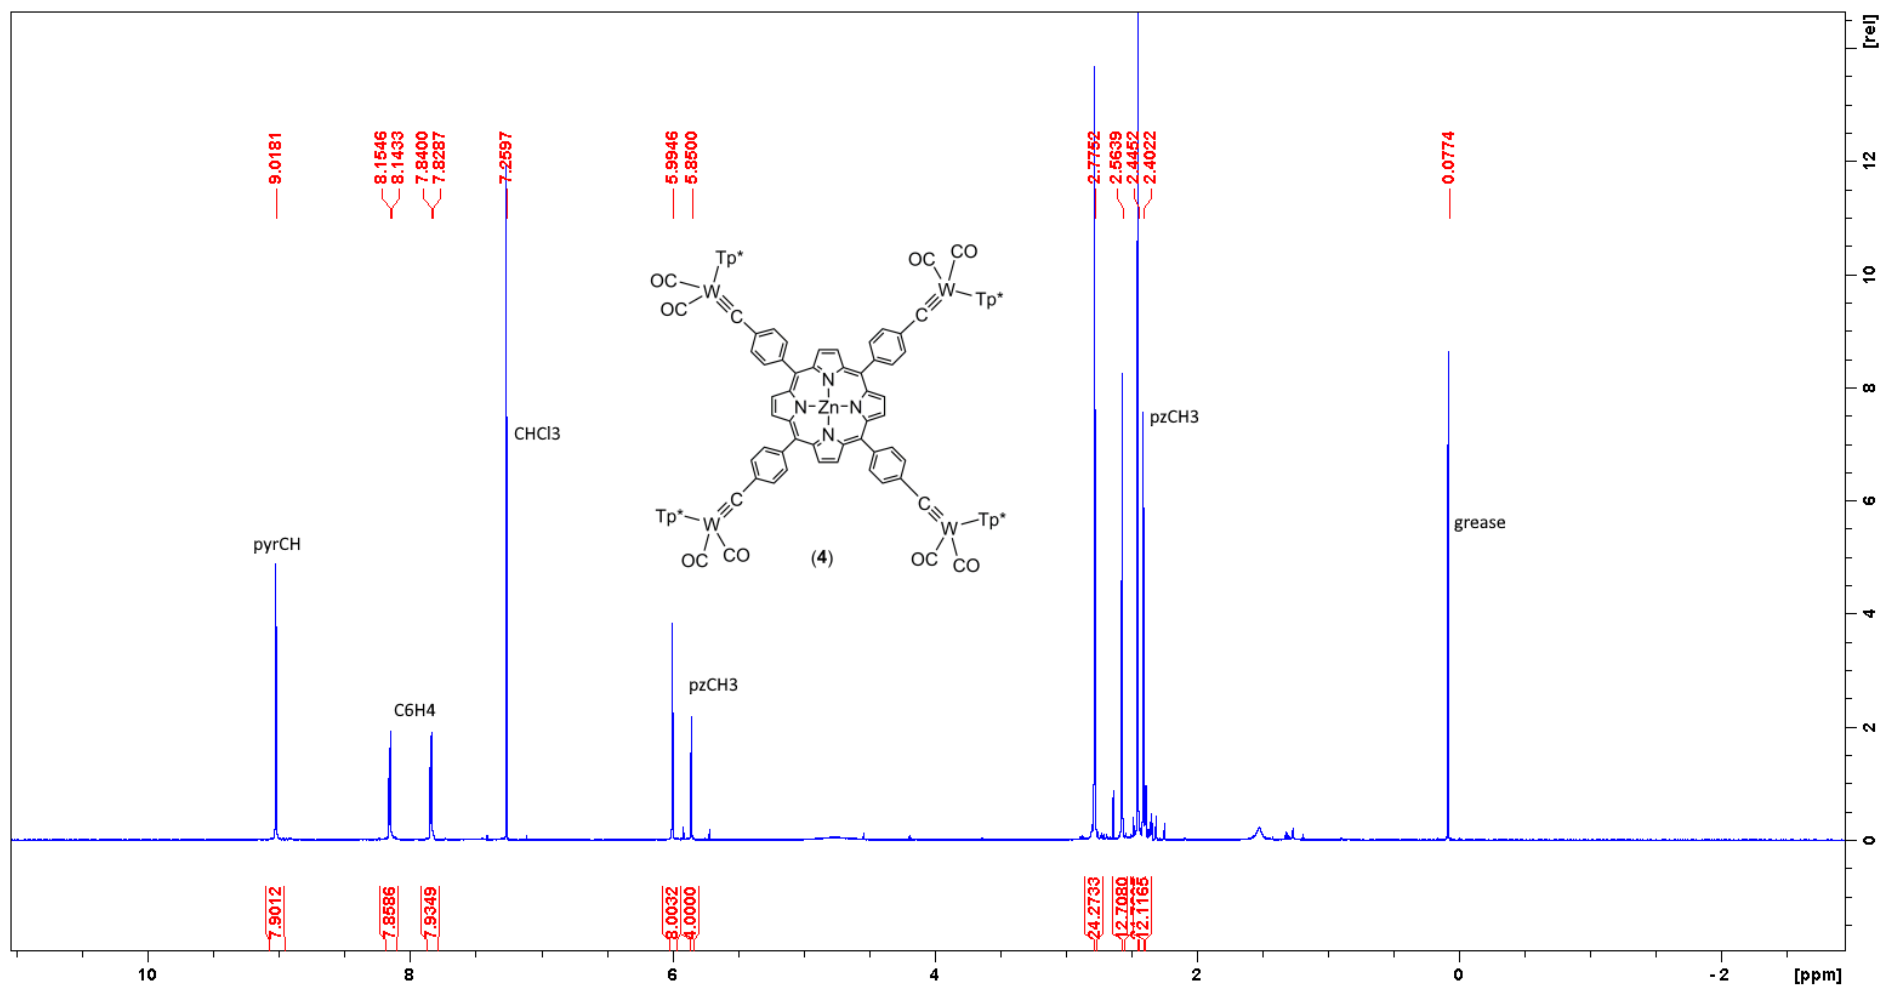

Figure S5  $^1\text{H}$  NMR spectrum (700 MHz,  $\text{CDCl}_3$ , 25  $^\circ\text{C}$ ,  $\delta$ ) of **4**.

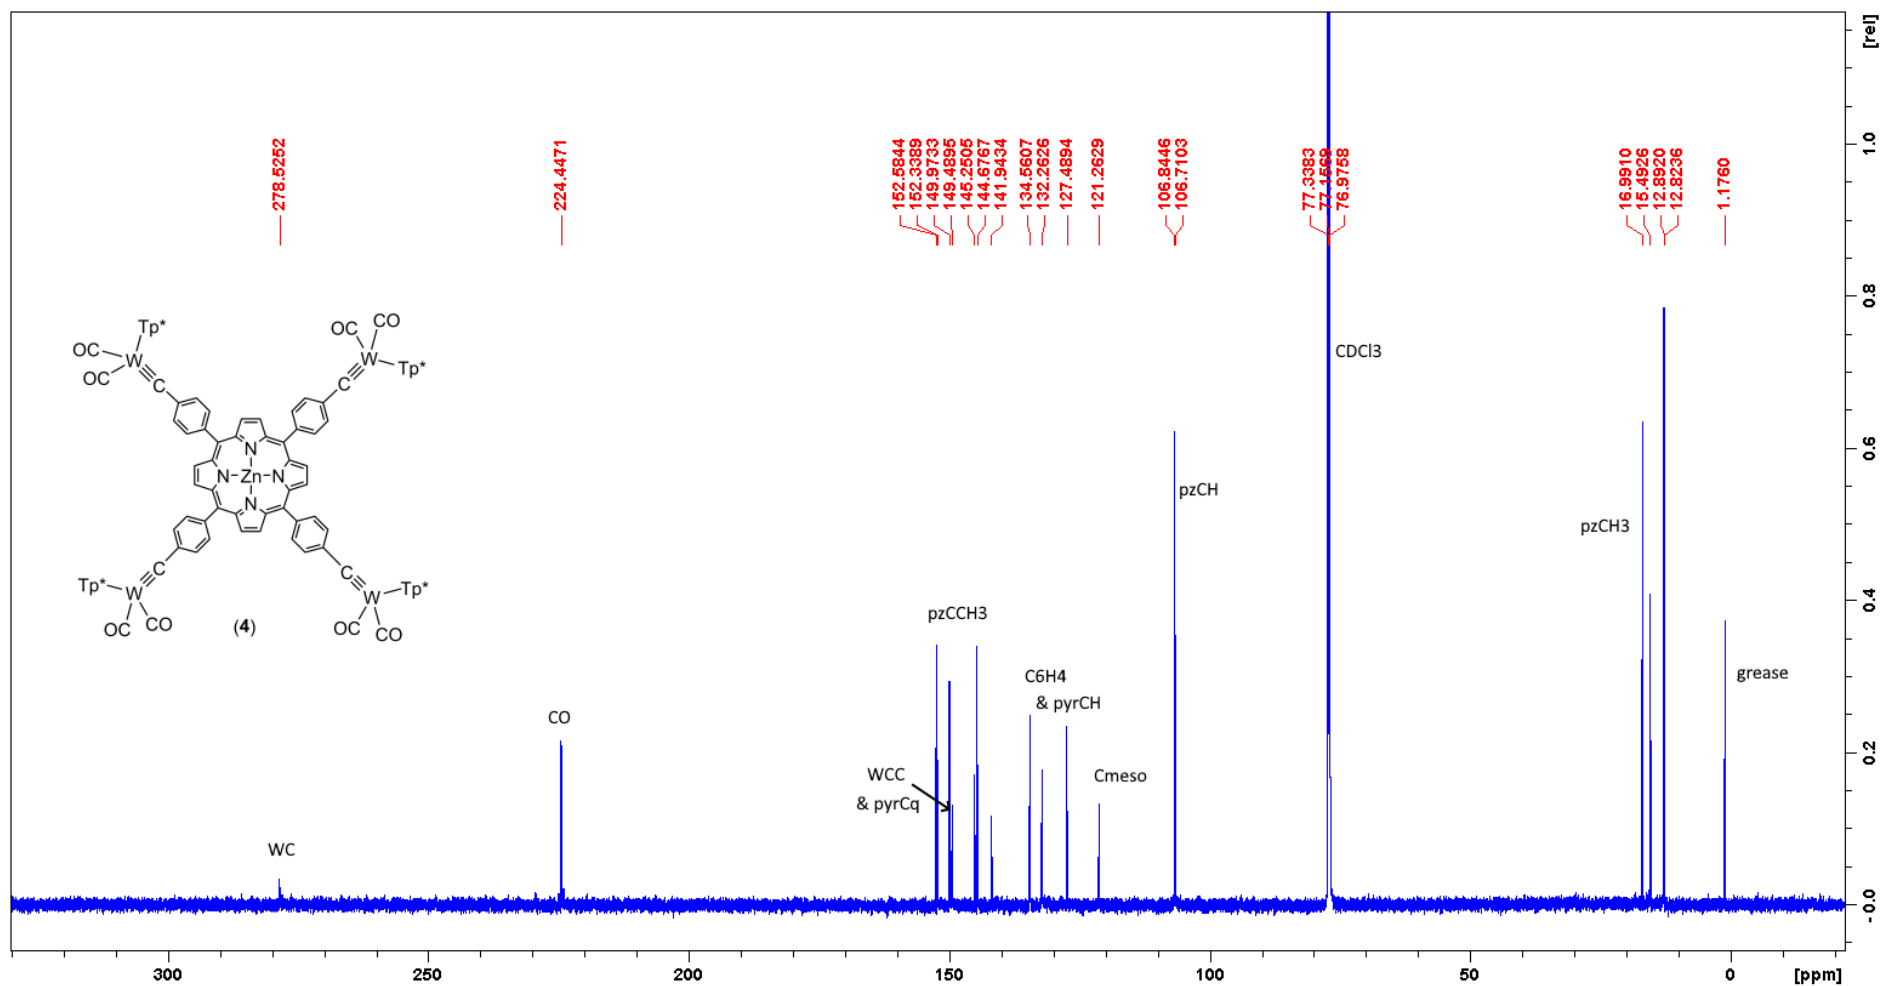

**Figure S6.**  $^{13}\text{C}\{^1\text{H}\}$  NMR spectrum (176 MHz,  $\text{CDCl}_3$ , 25 °C,  $\delta$ ) of **4**.

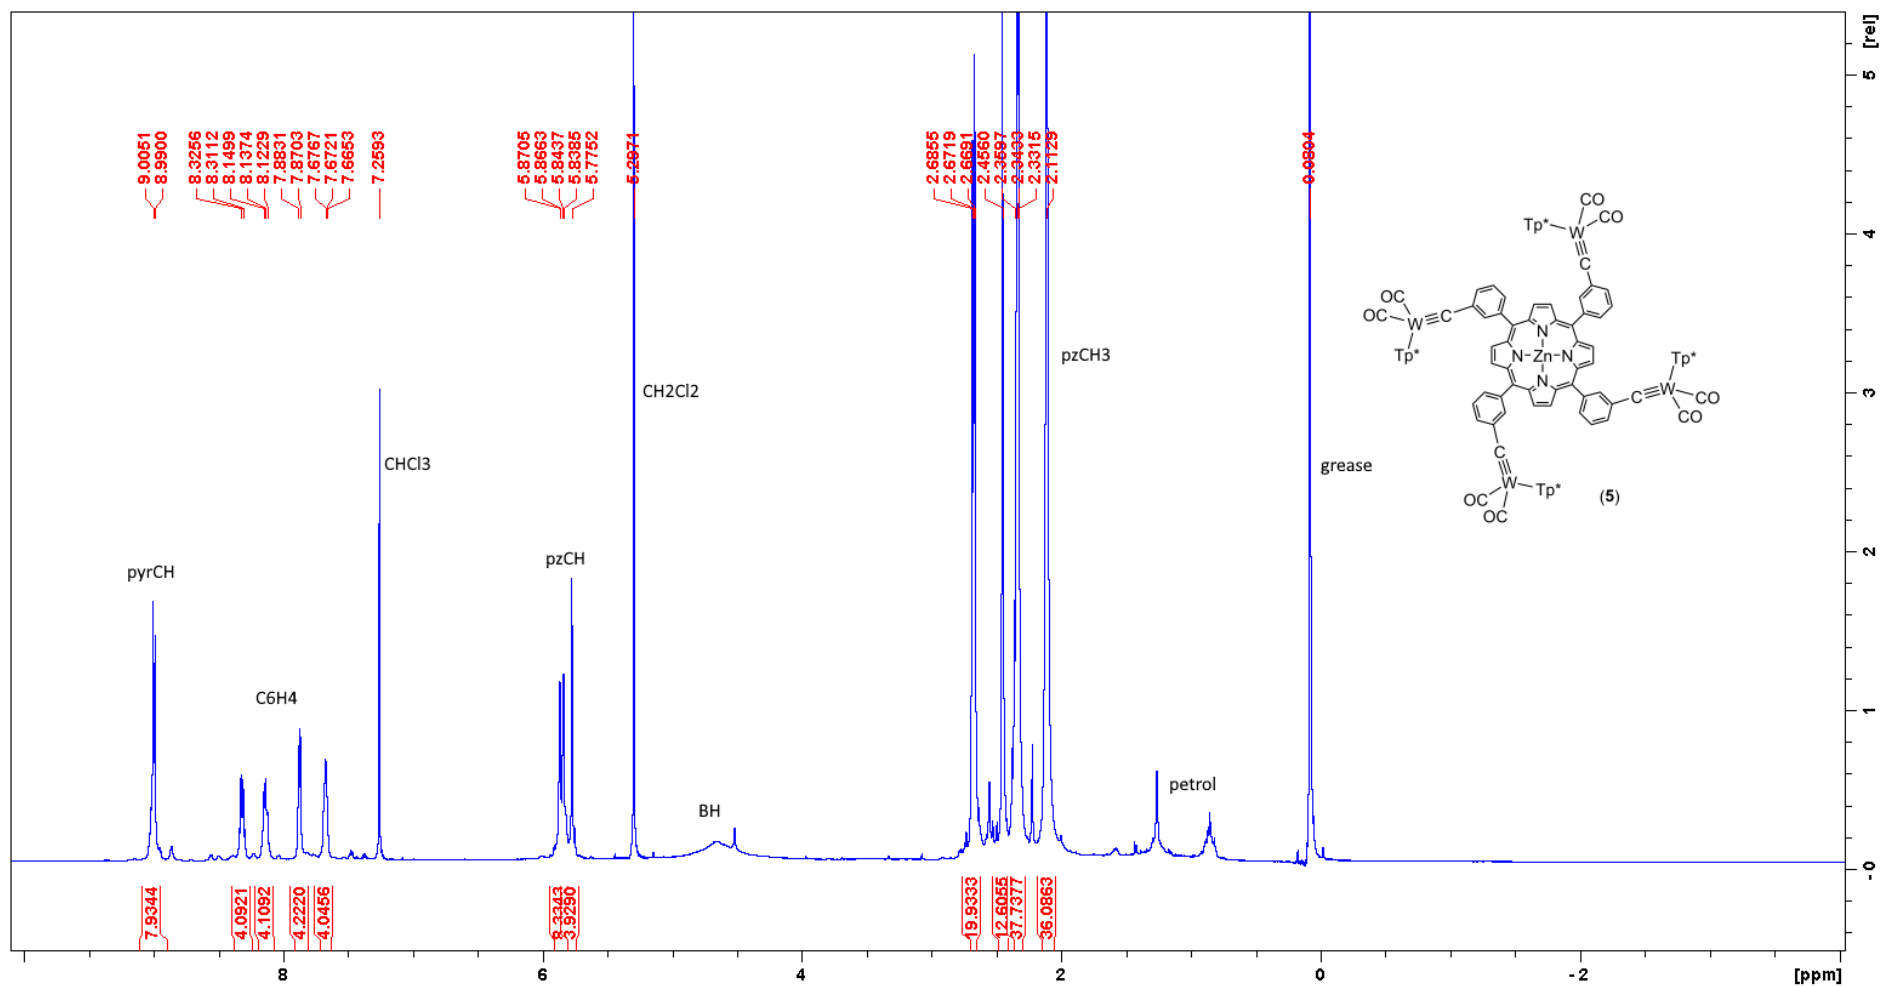



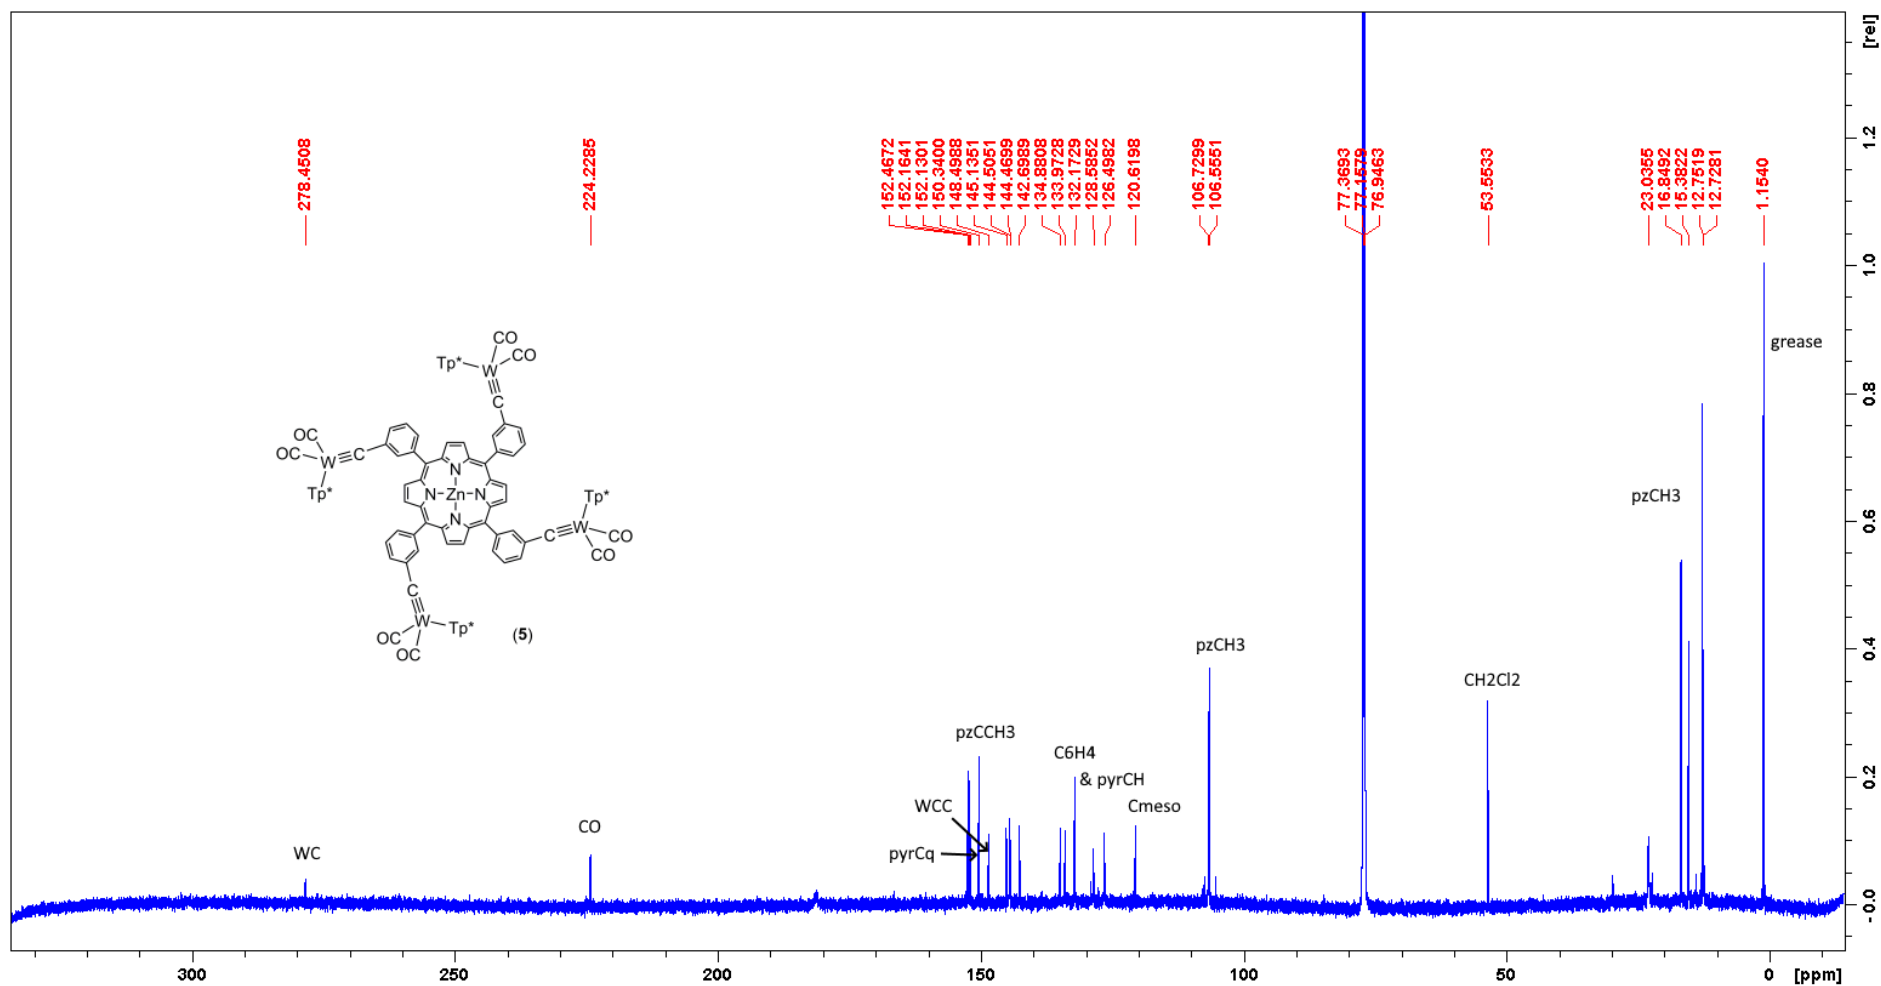

Figure S8.  $^{13}\text{C}\{^1\text{H}\}$  NMR spectrum (176 MHz,  $\text{CDCl}_3$ , 25 °C,  $\delta$ ) of 5.

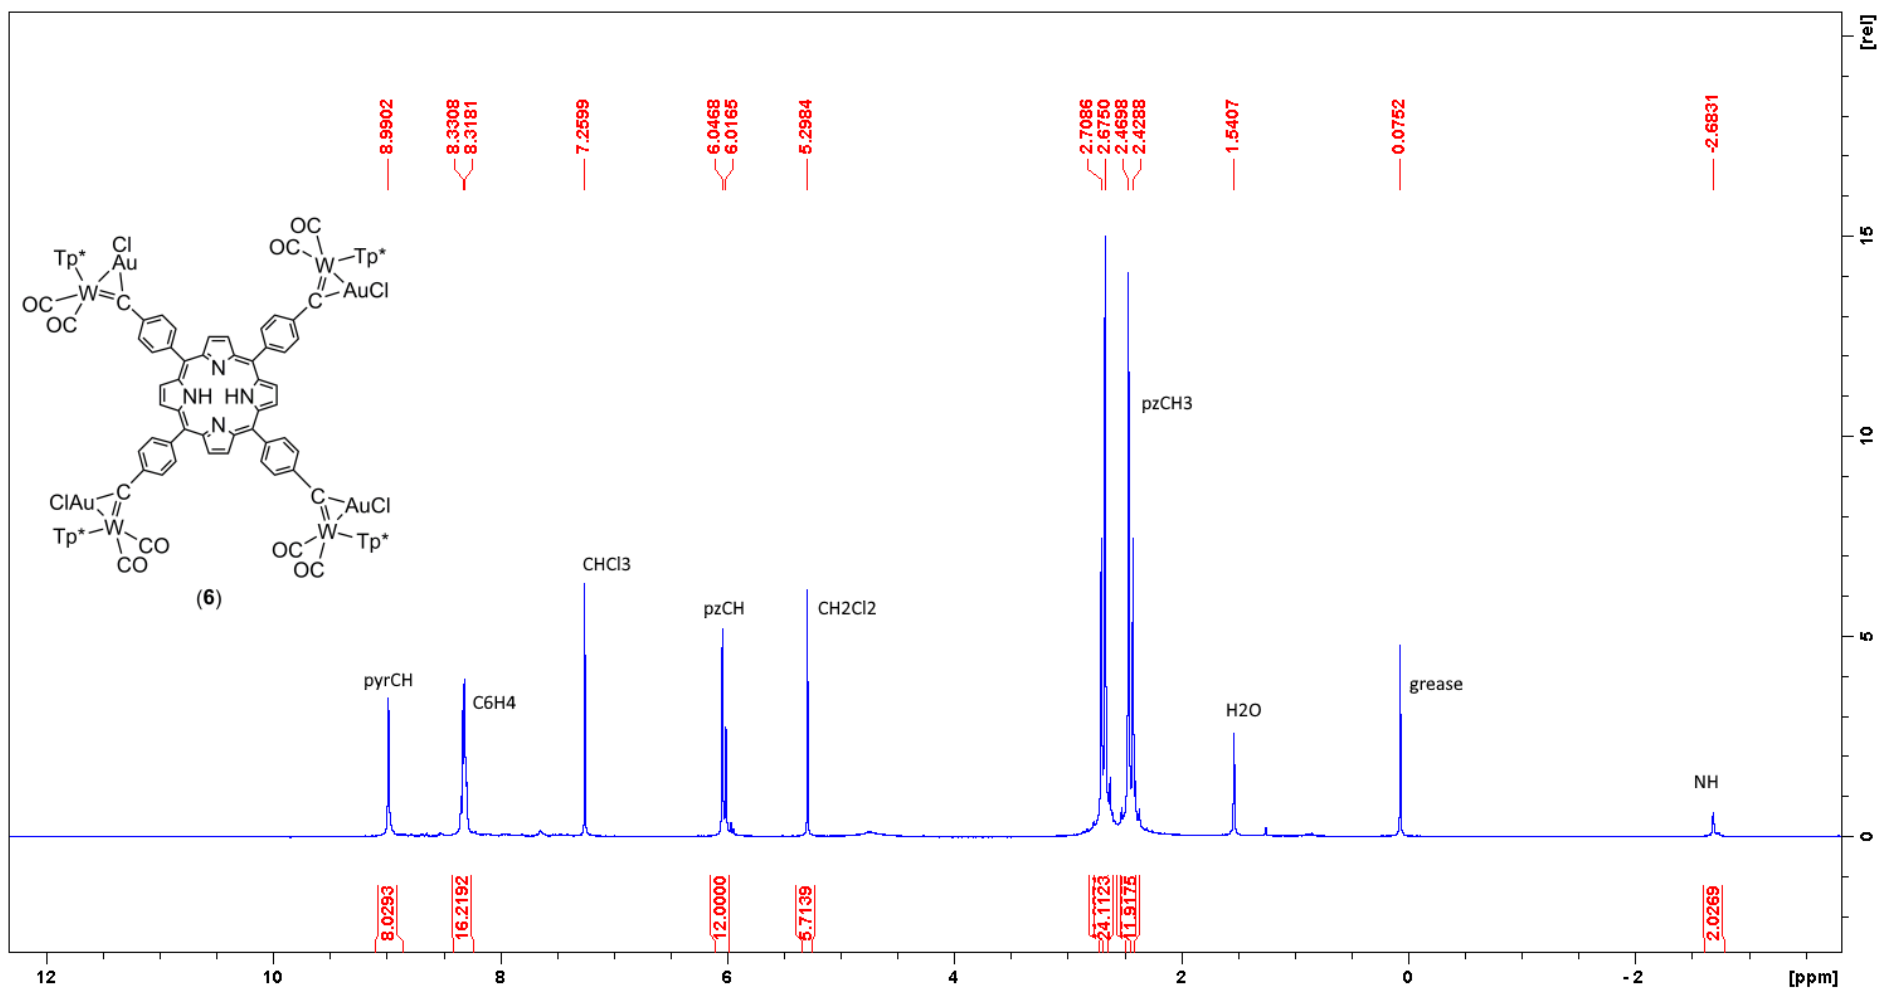

Figure S9.  $^1\text{H}$  NMR spectrum (600 MHz,  $\text{CDCl}_3$ , 25 °C,  $\delta$ ) of **6**.

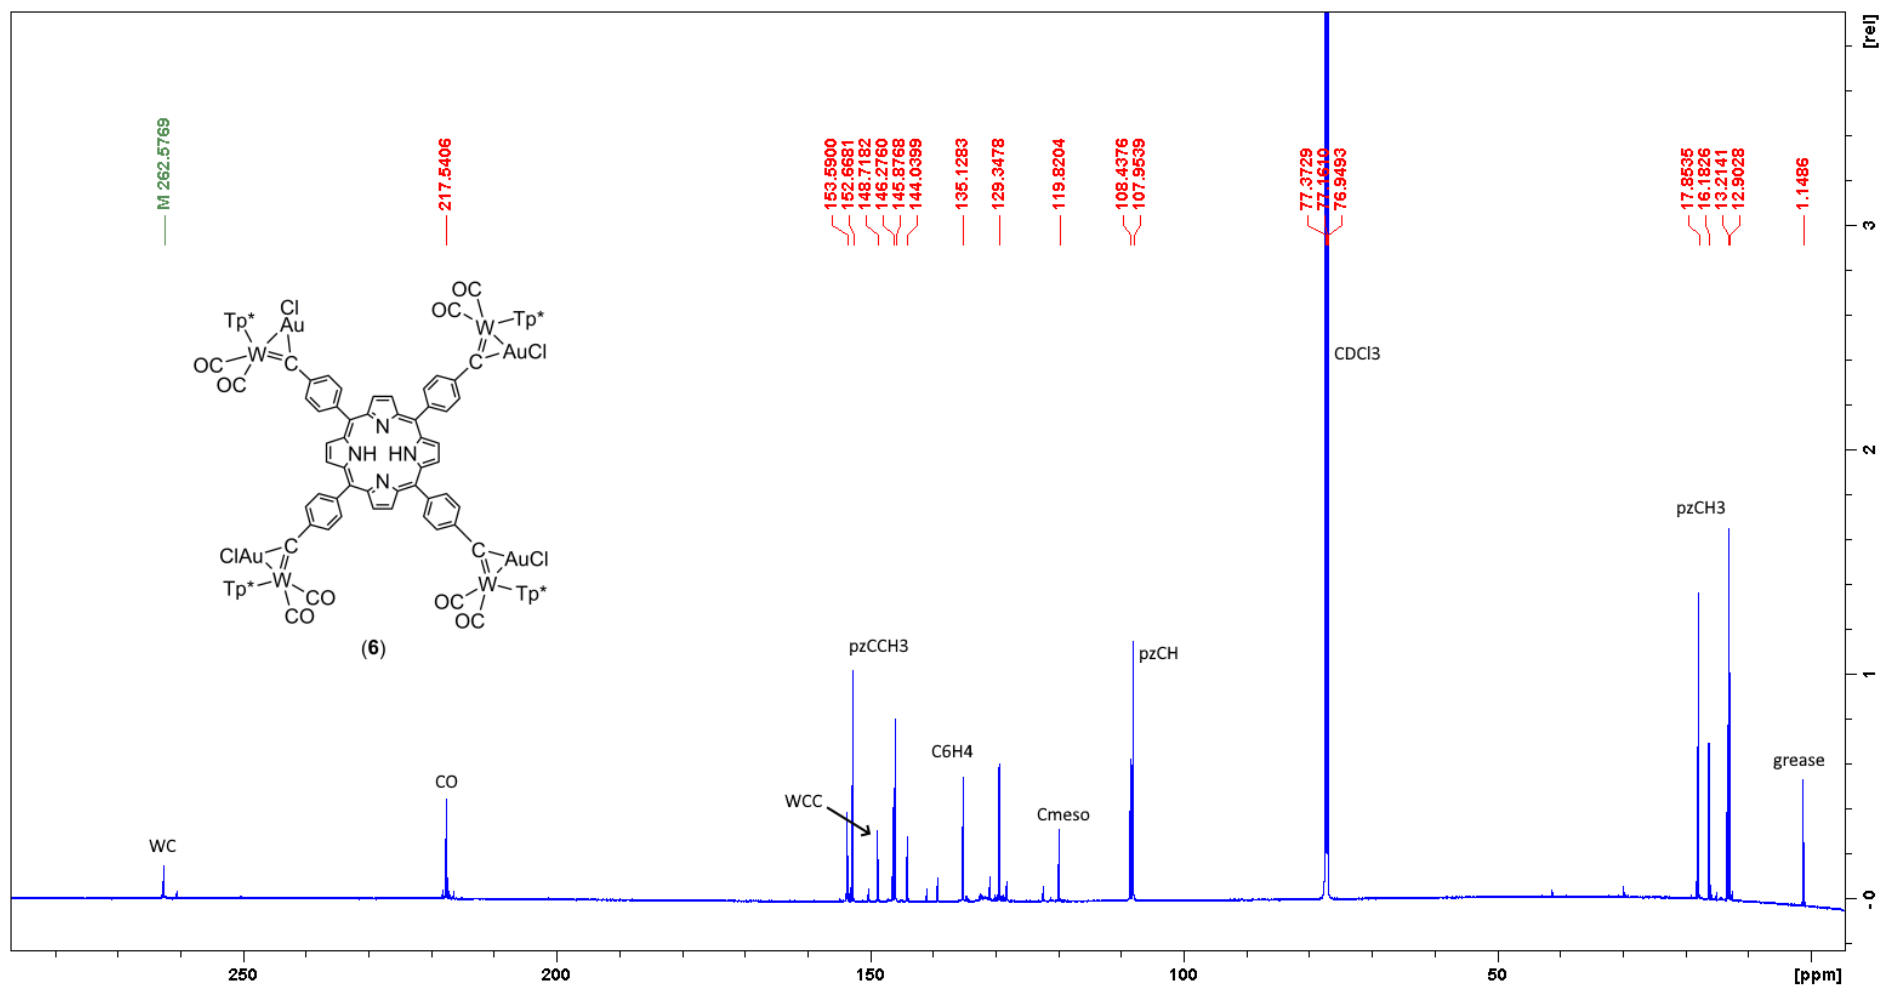

**Figure S10.**  $^{13}\text{C}\{^1\text{H}\}$  NMR spectrum (151 MHz,  $\text{CDCl}_3$ , 25 °C,  $\delta$ ) of **6**.

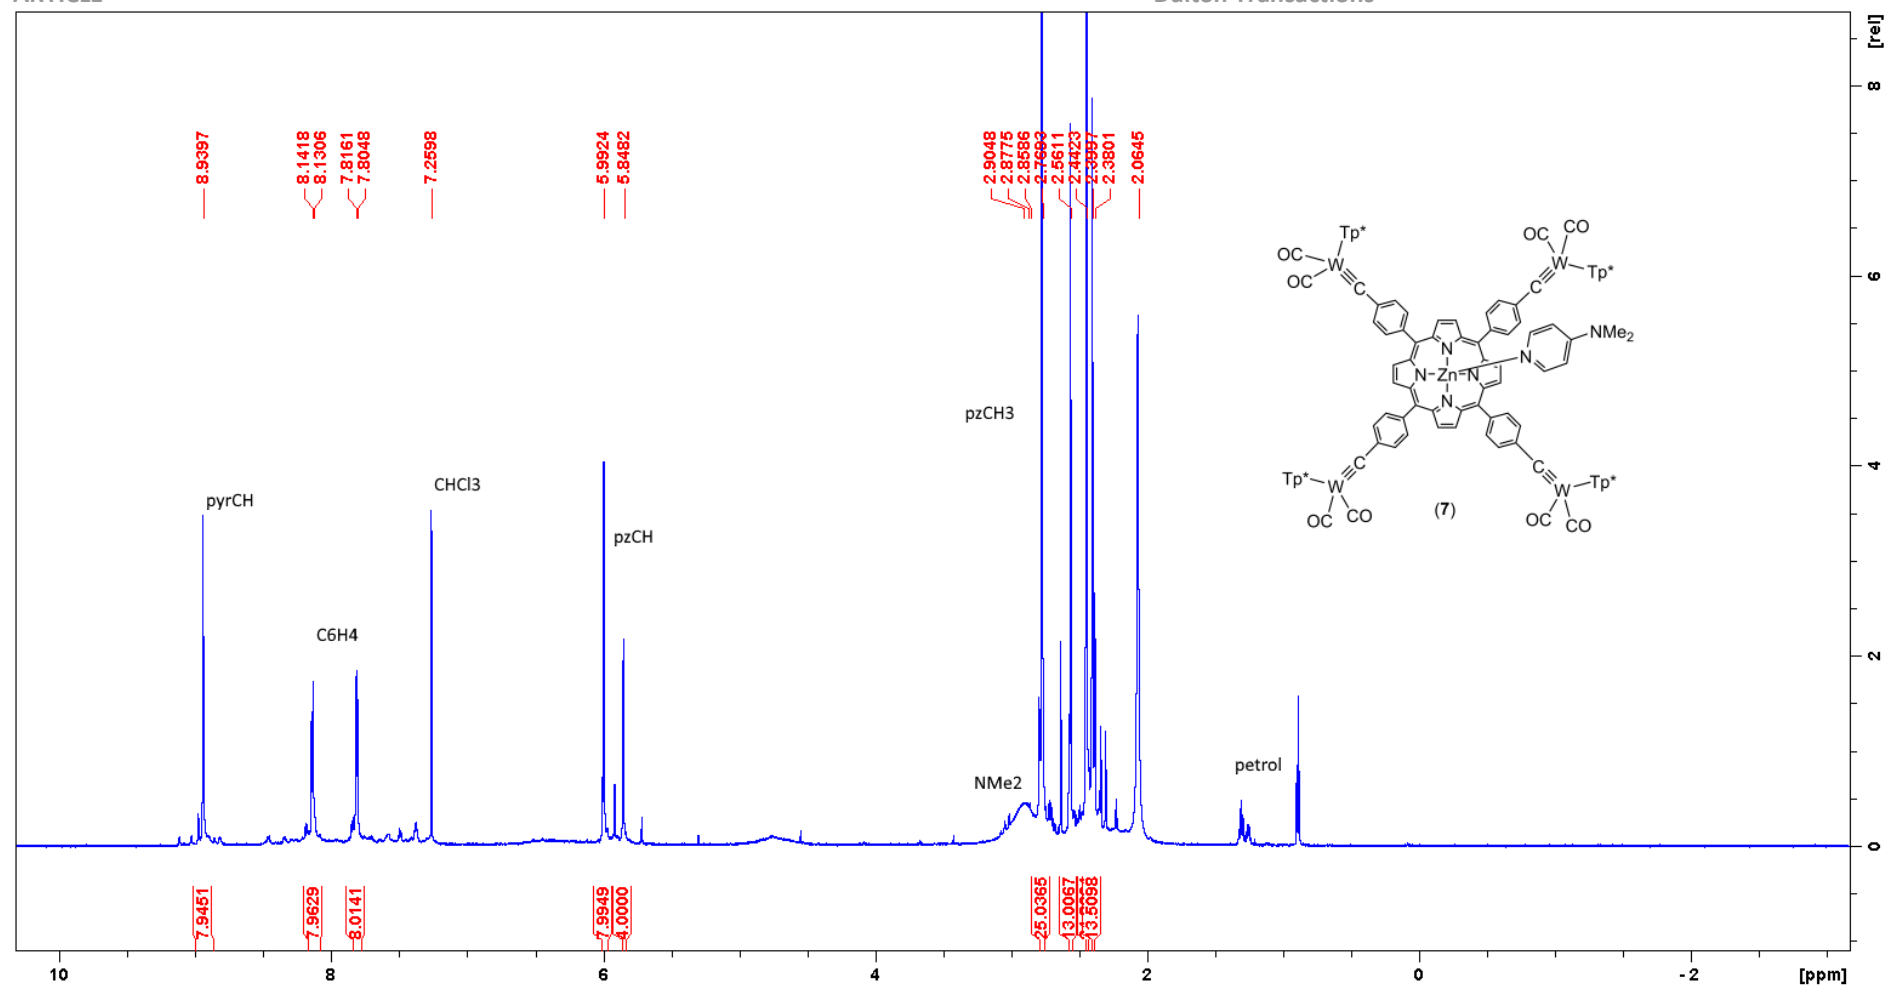

**Figure S11.**  $^1\text{H}$  NMR spectrum (700 MHz,  $\text{CDCl}_3$ , 20 °C,  $\delta$ ) of **7** (4 in the presence of excess 4-DMAP).

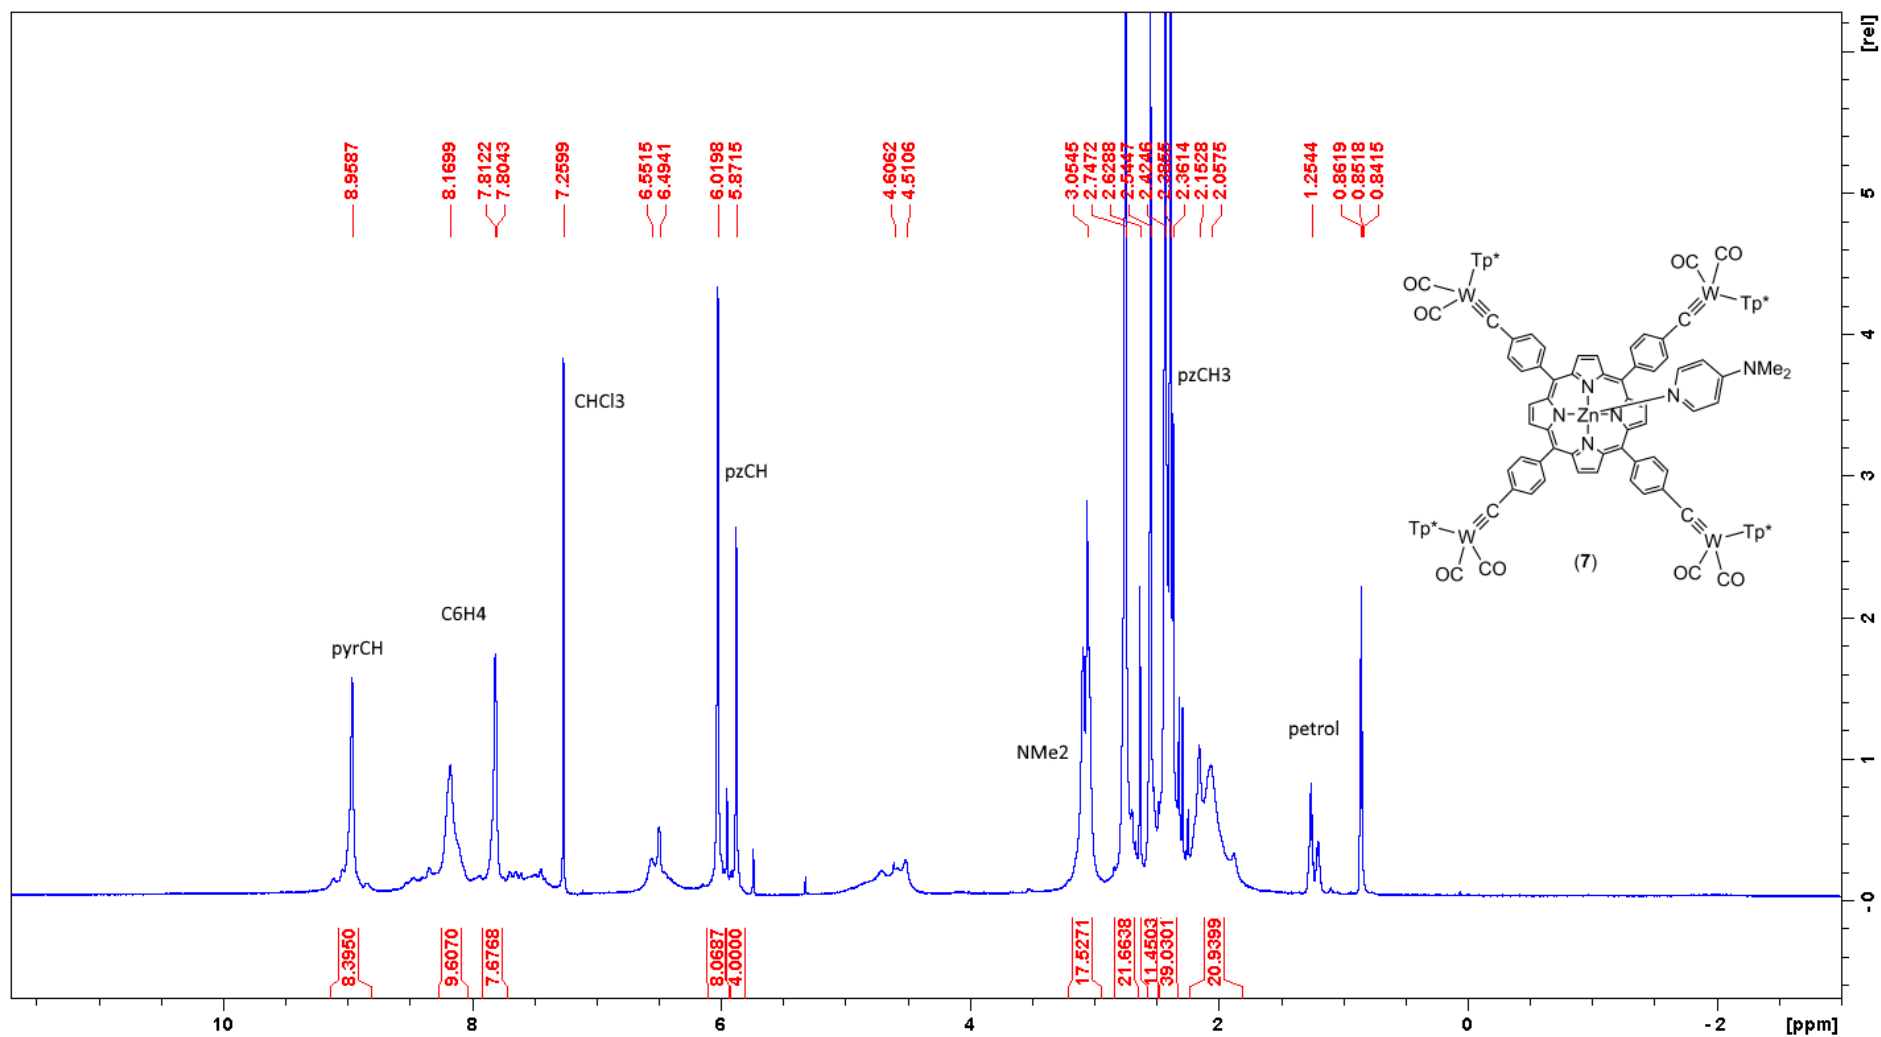

**Figure S12.**  $^1\text{H}$  NMR spectrum (700 MHz,  $\text{CDCl}_3$ ,  $-60^\circ\text{C}$ ,  $\delta$ ) of **7** (**4** in the presence of excess 4-DMAP).

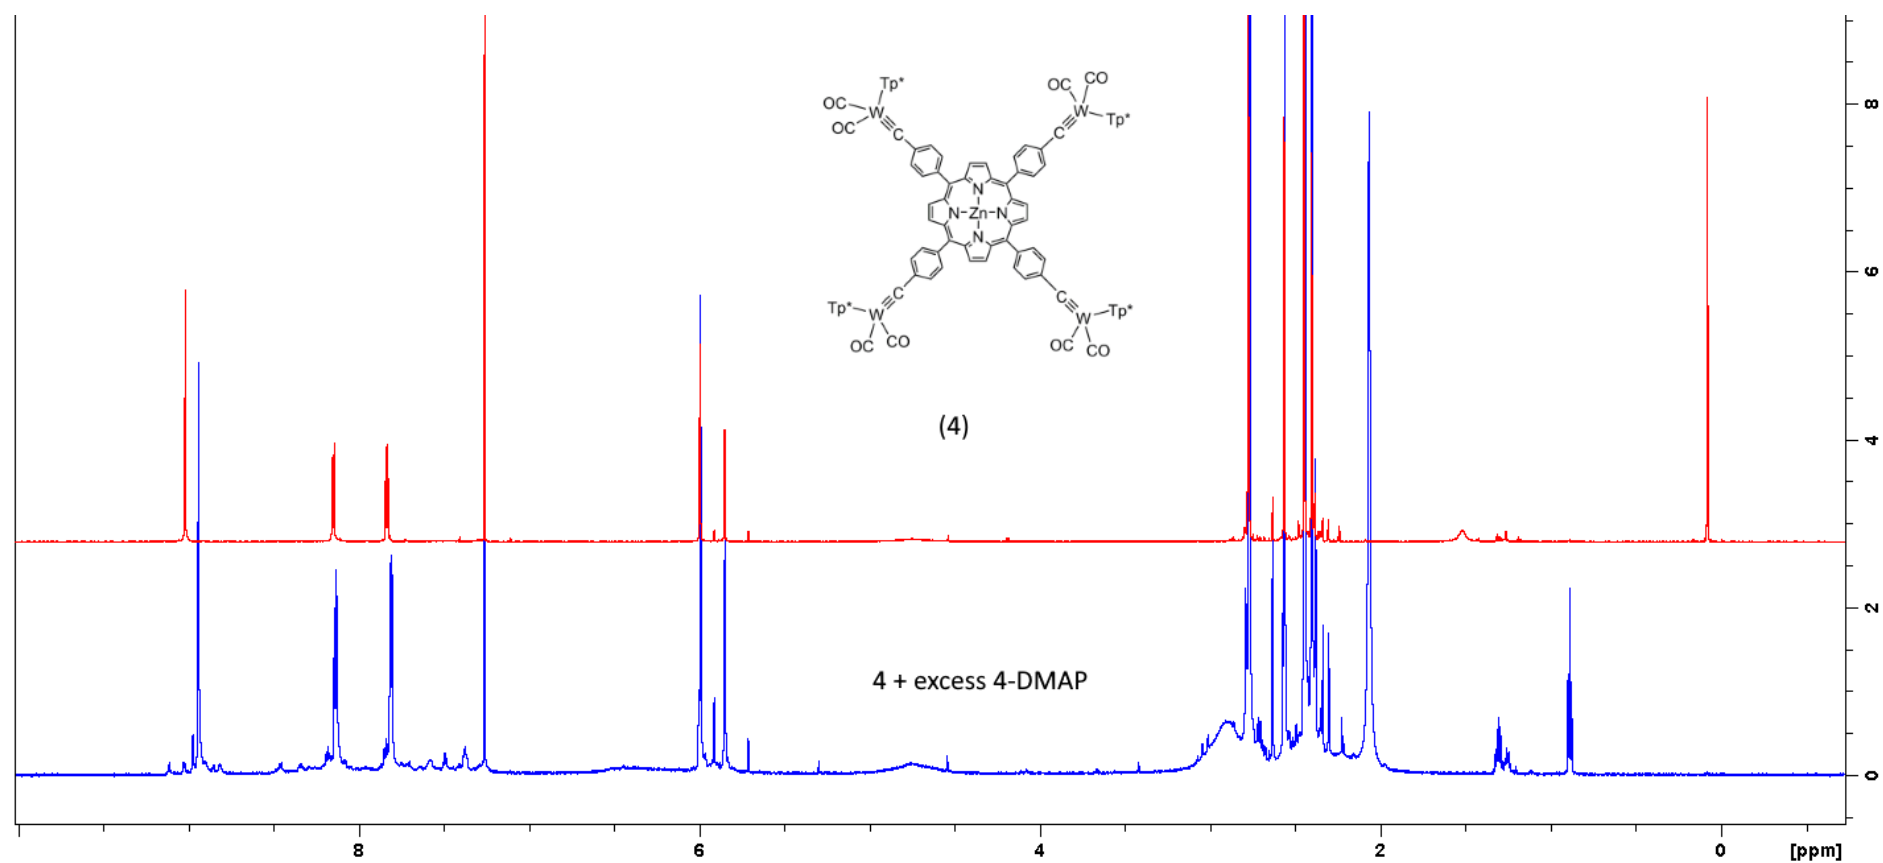

**Figure S13.** Comparison of  $^1\text{H}$  NMR spectra of **4** and **7** (a mixture of **4** and excess 4-DMAP) at 25 °C.

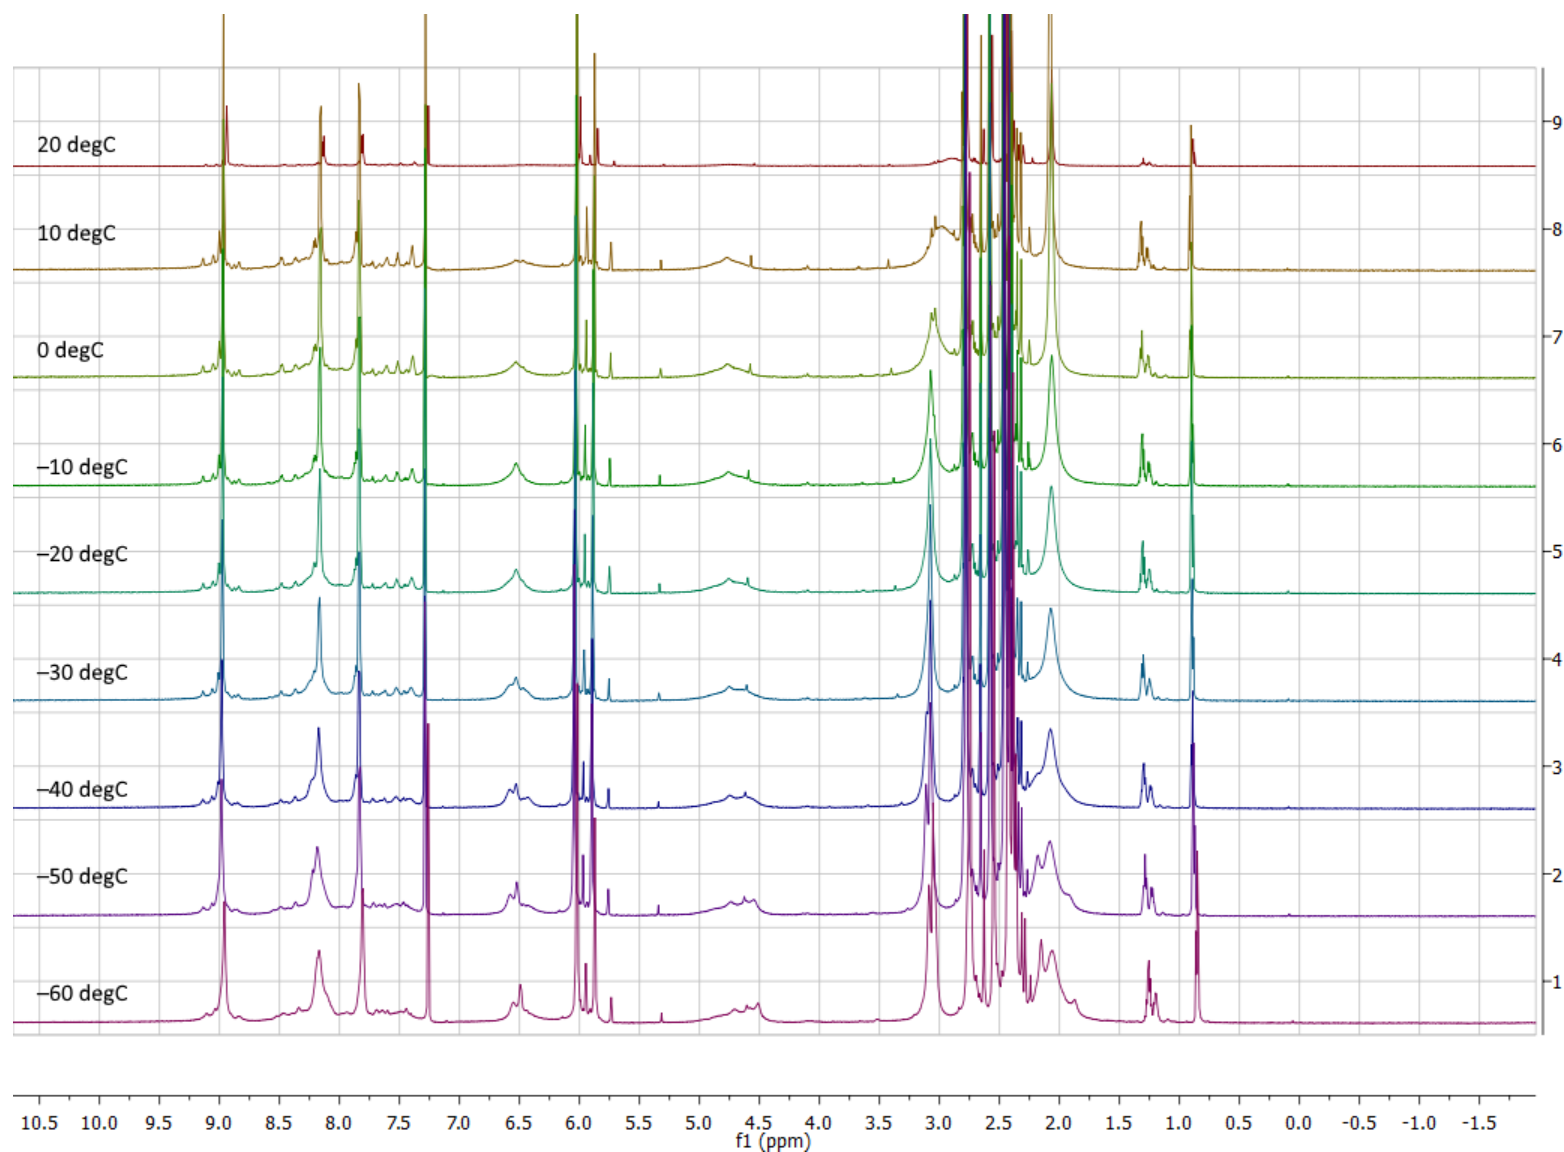

**Figure S14.** Variable-temperature  $^1\text{H}$  NMR spectrum (700 MHz,  $\text{CDCl}_3$ ,  $\delta$ ) of **7** (**4** in the presence of excess 4-DMAP).

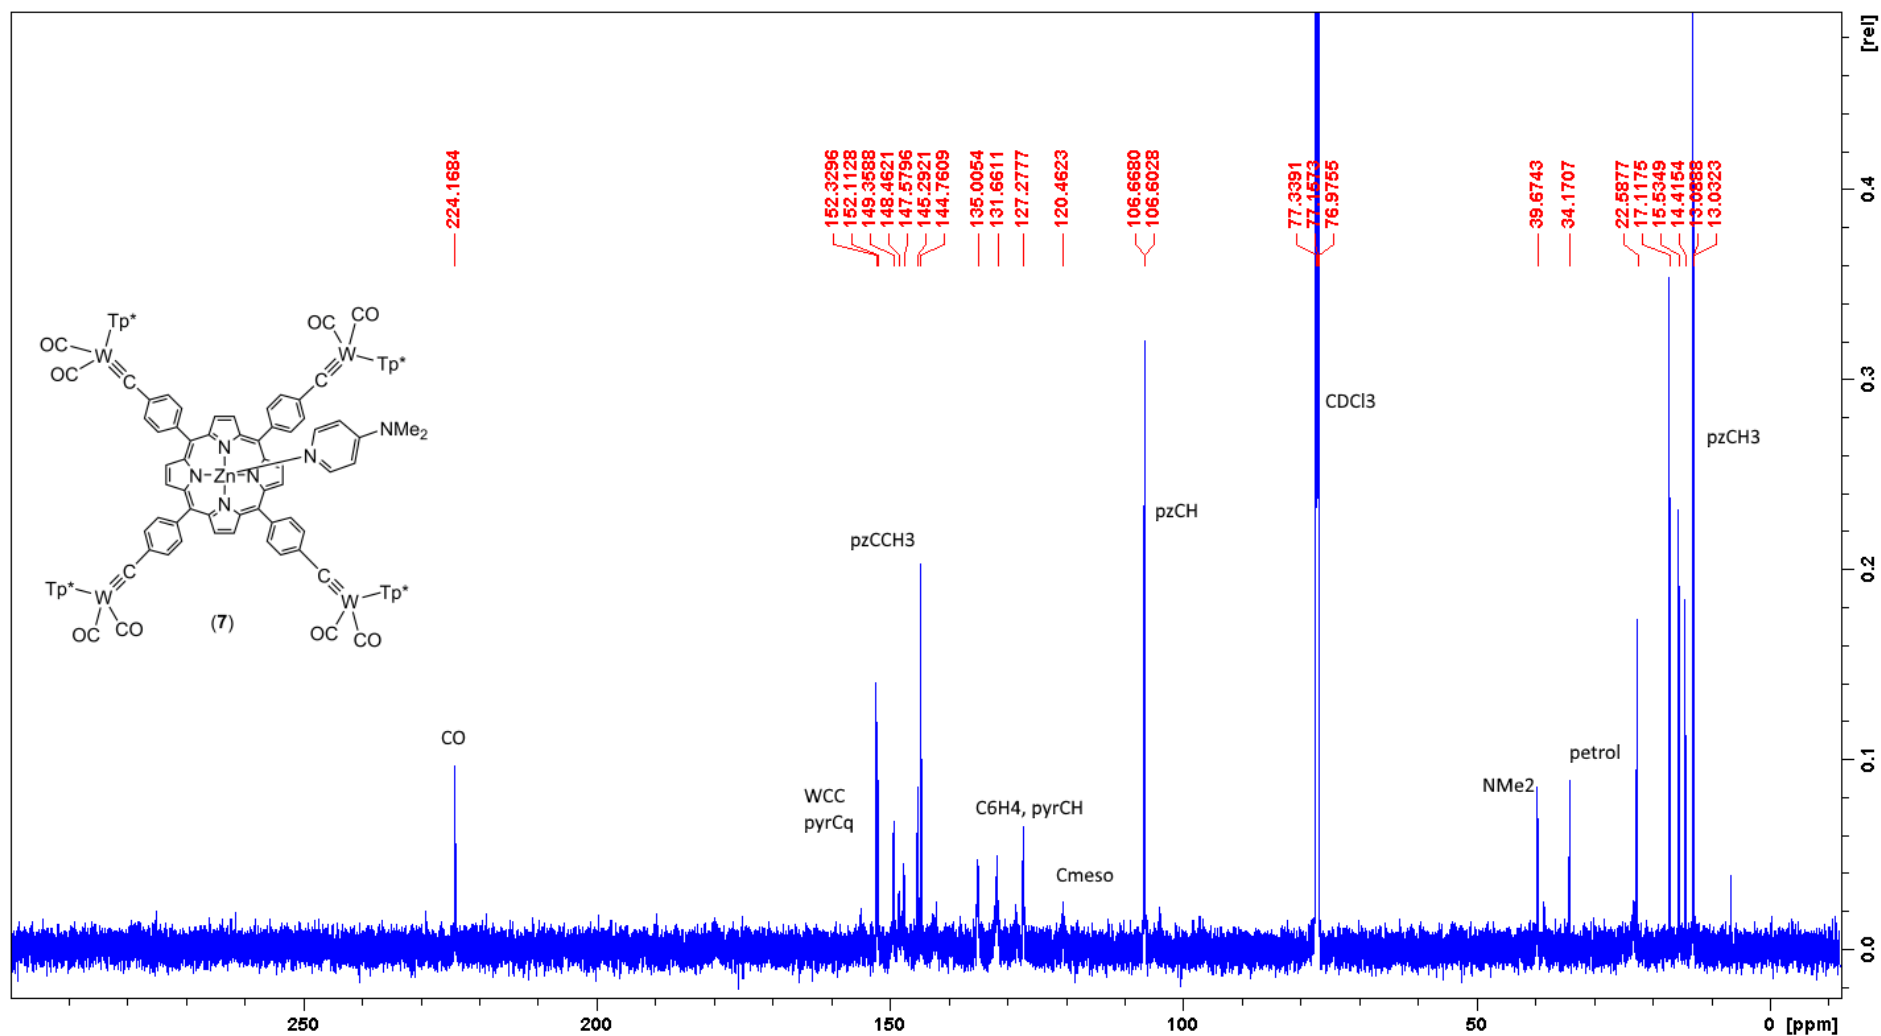

**Figure S15.**  $^{13}\text{C}\{^1\text{H}\}$  NMR spectrum (176 MHz,  $\text{CDCl}_3$ ,  $-60^\circ\text{C}$ ,  $\delta$ ) of **7** (**4** in the presence of excess 4-DMAP).



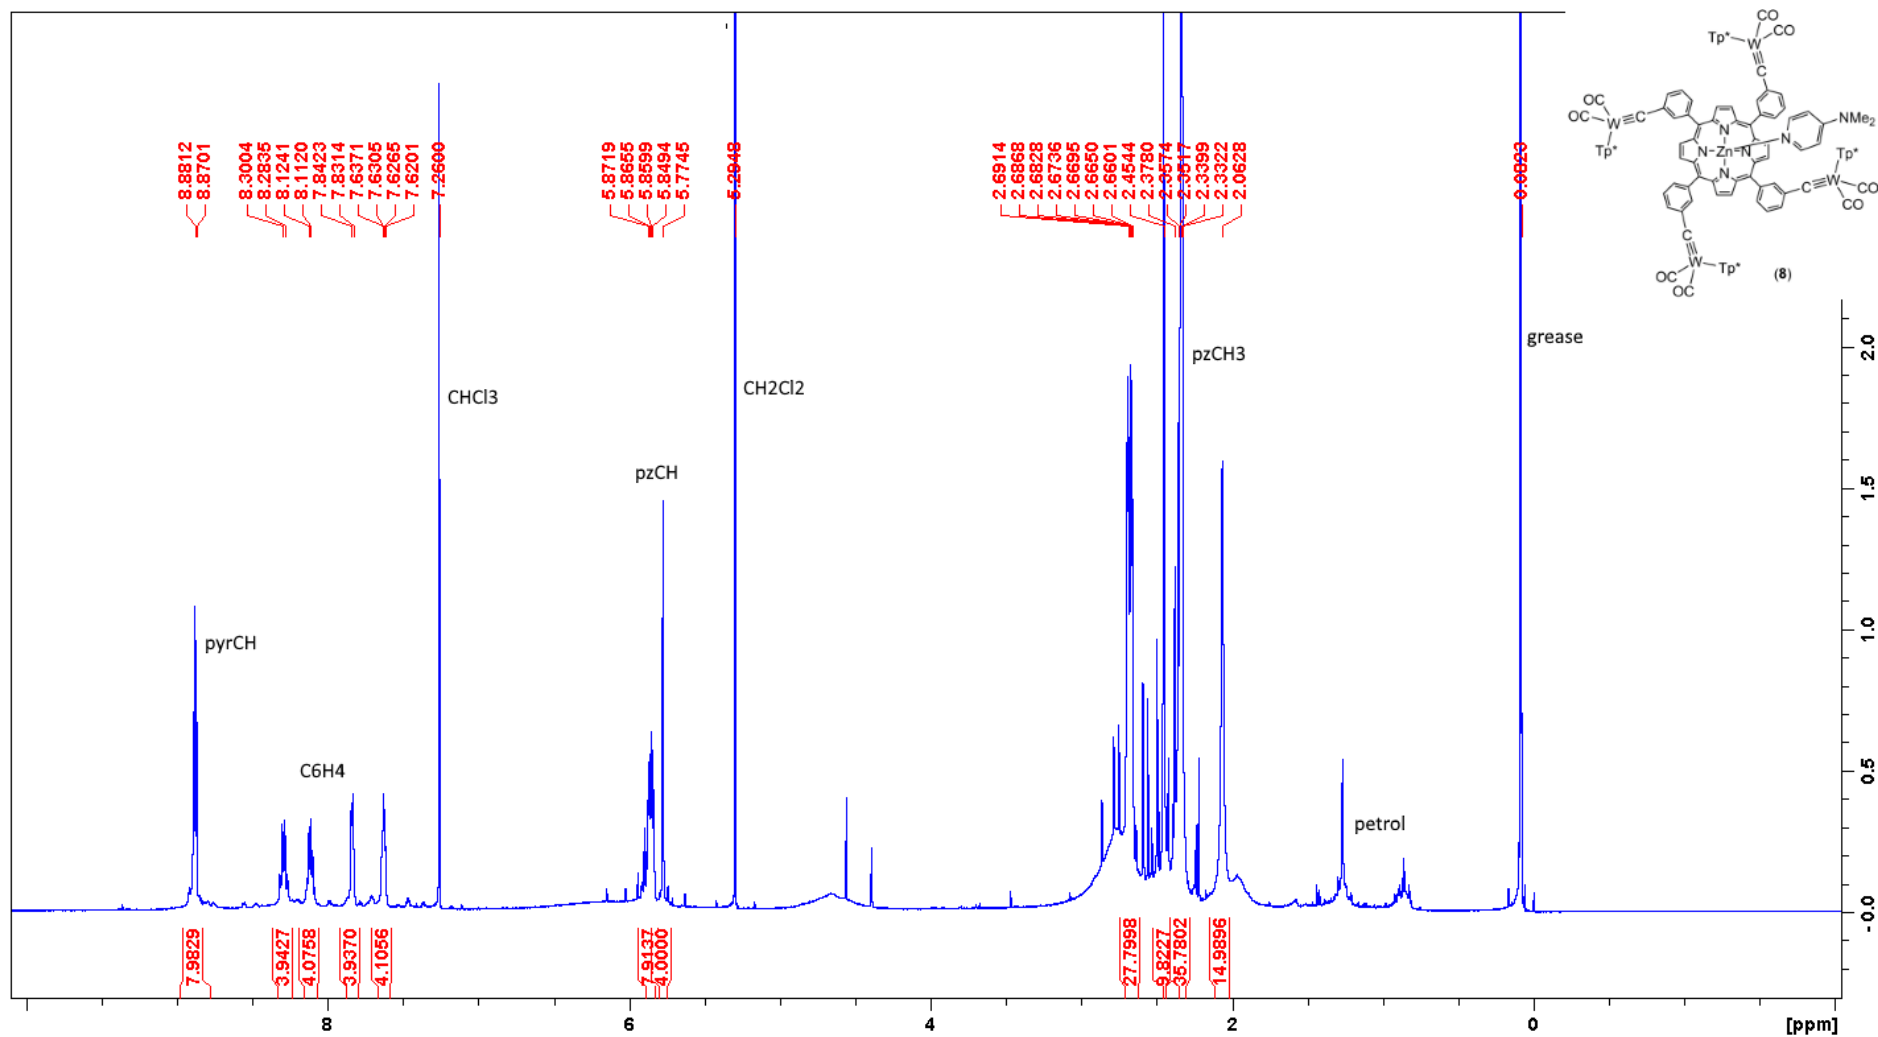

**Figure S16.**  $^1\text{H}$  NMR spectrum (700 MHz,  $\text{CDCl}_3$ ,  $25^\circ\text{C}$ ,  $\delta$ ) of **8** (**5** in the presence of excess 4-DMAP).

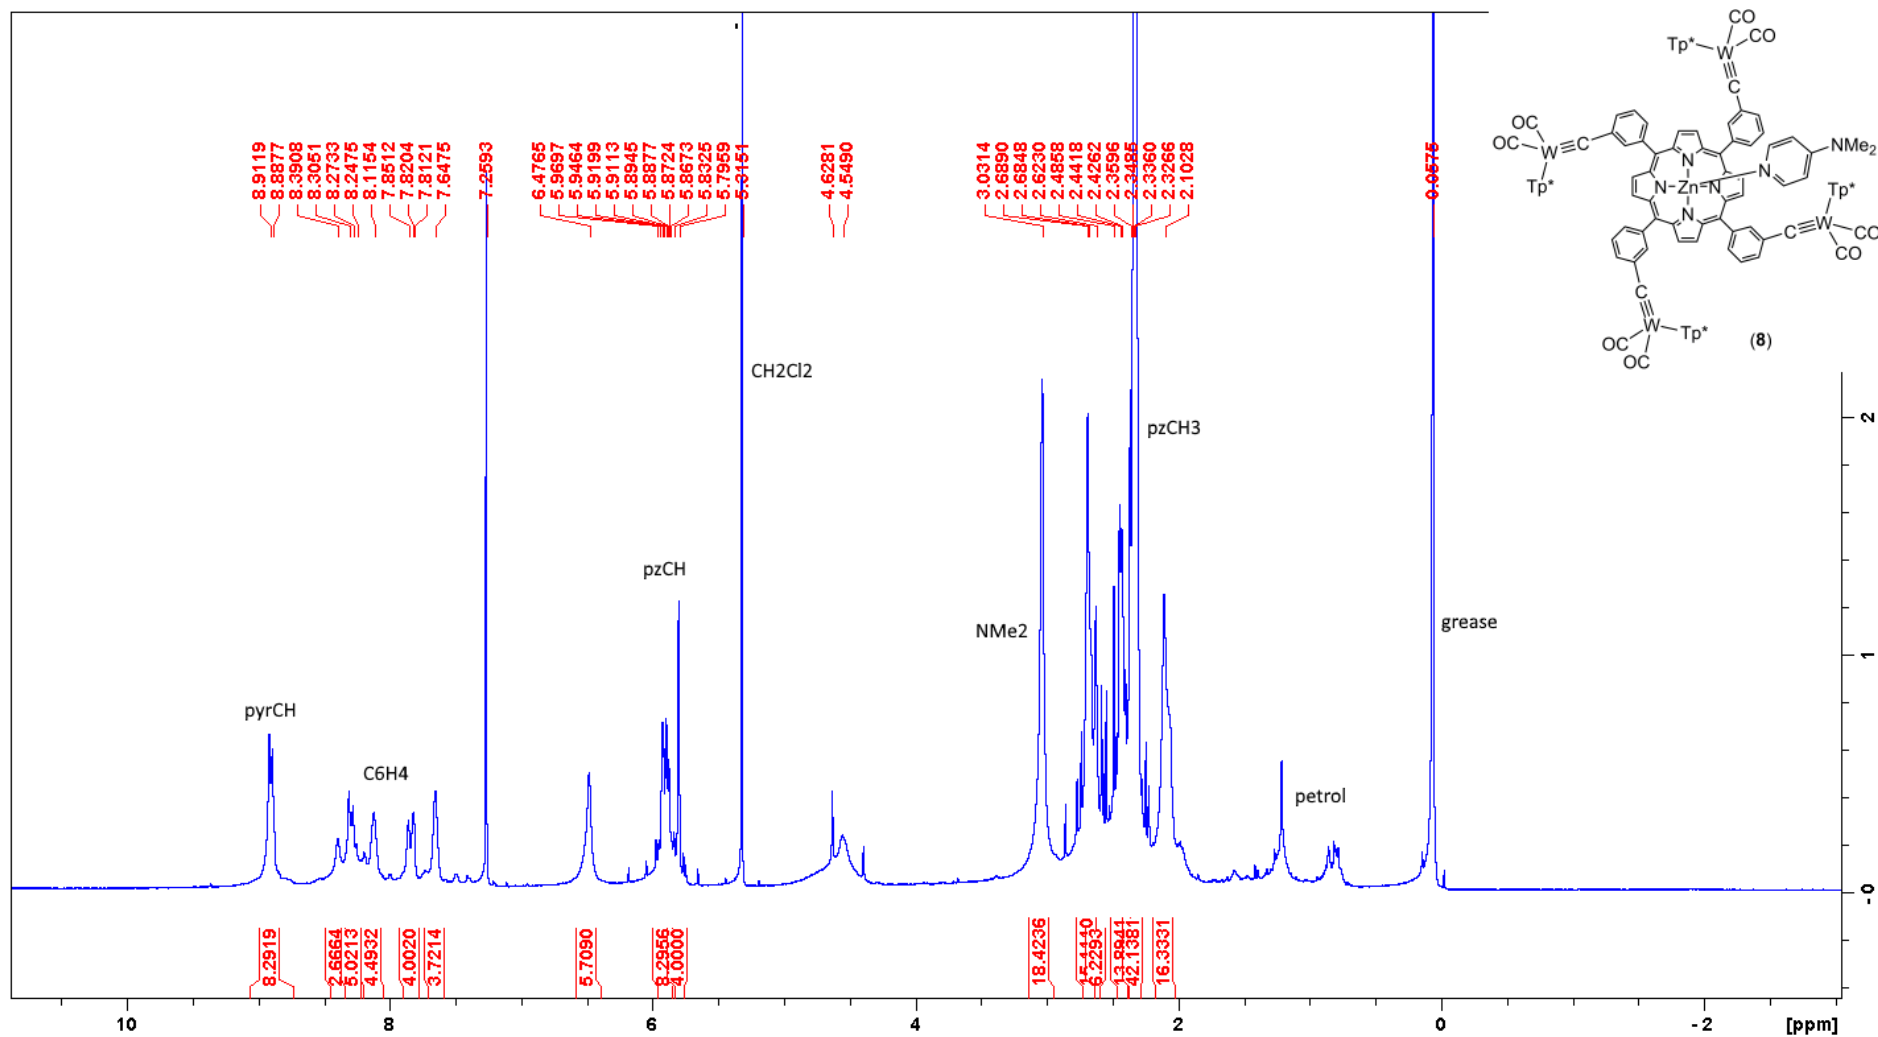

**Figure S17.**  $^1\text{H}$  NMR spectrum (700 MHz,  $\text{CDCl}_3$ ,  $-60^\circ\text{C}$ ,  $\delta$ ) of **8** (5 in the presence of excess 4-DMAP).

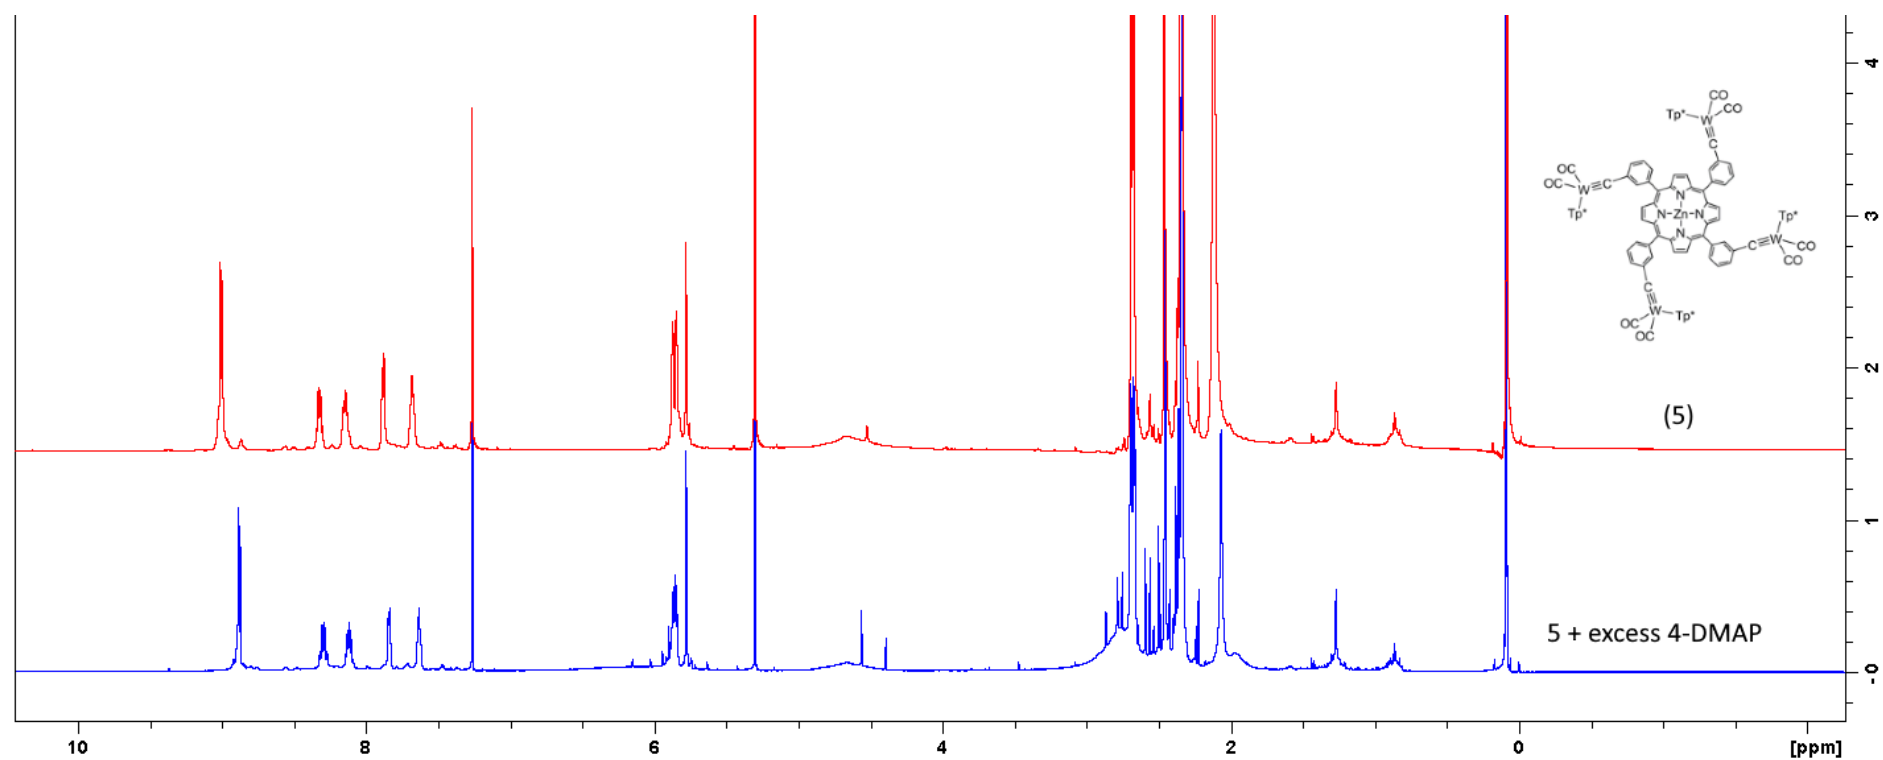

**Figure S18.** Comparison of <sup>1</sup>H NMR spectra of **5** and **8** (a mixture of **5** and excess 4-DMAP) at 25 °C.

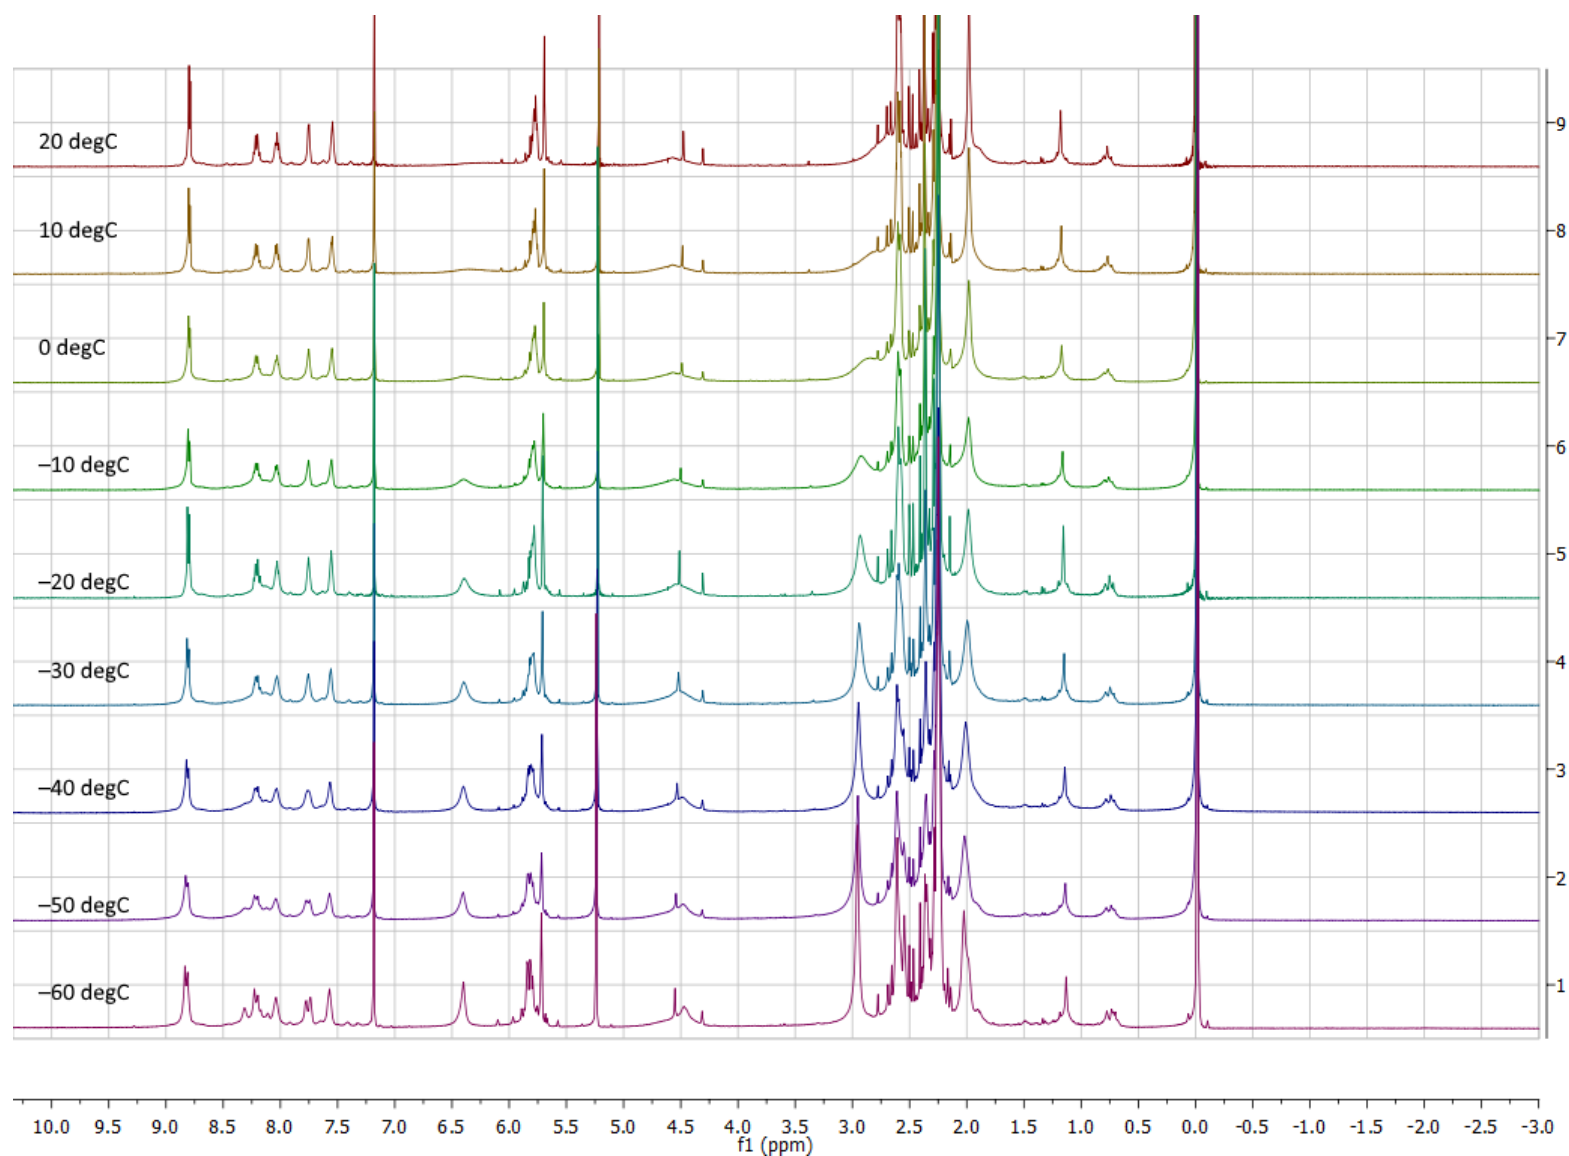

**Figure S19.** Variable-temperature  $^1\text{H}$  NMR spectrum (700 MHz,  $\text{CDCl}_3$ ,  $\delta$ ) of **8** (**5** in the presence of excess 4-DMAP).

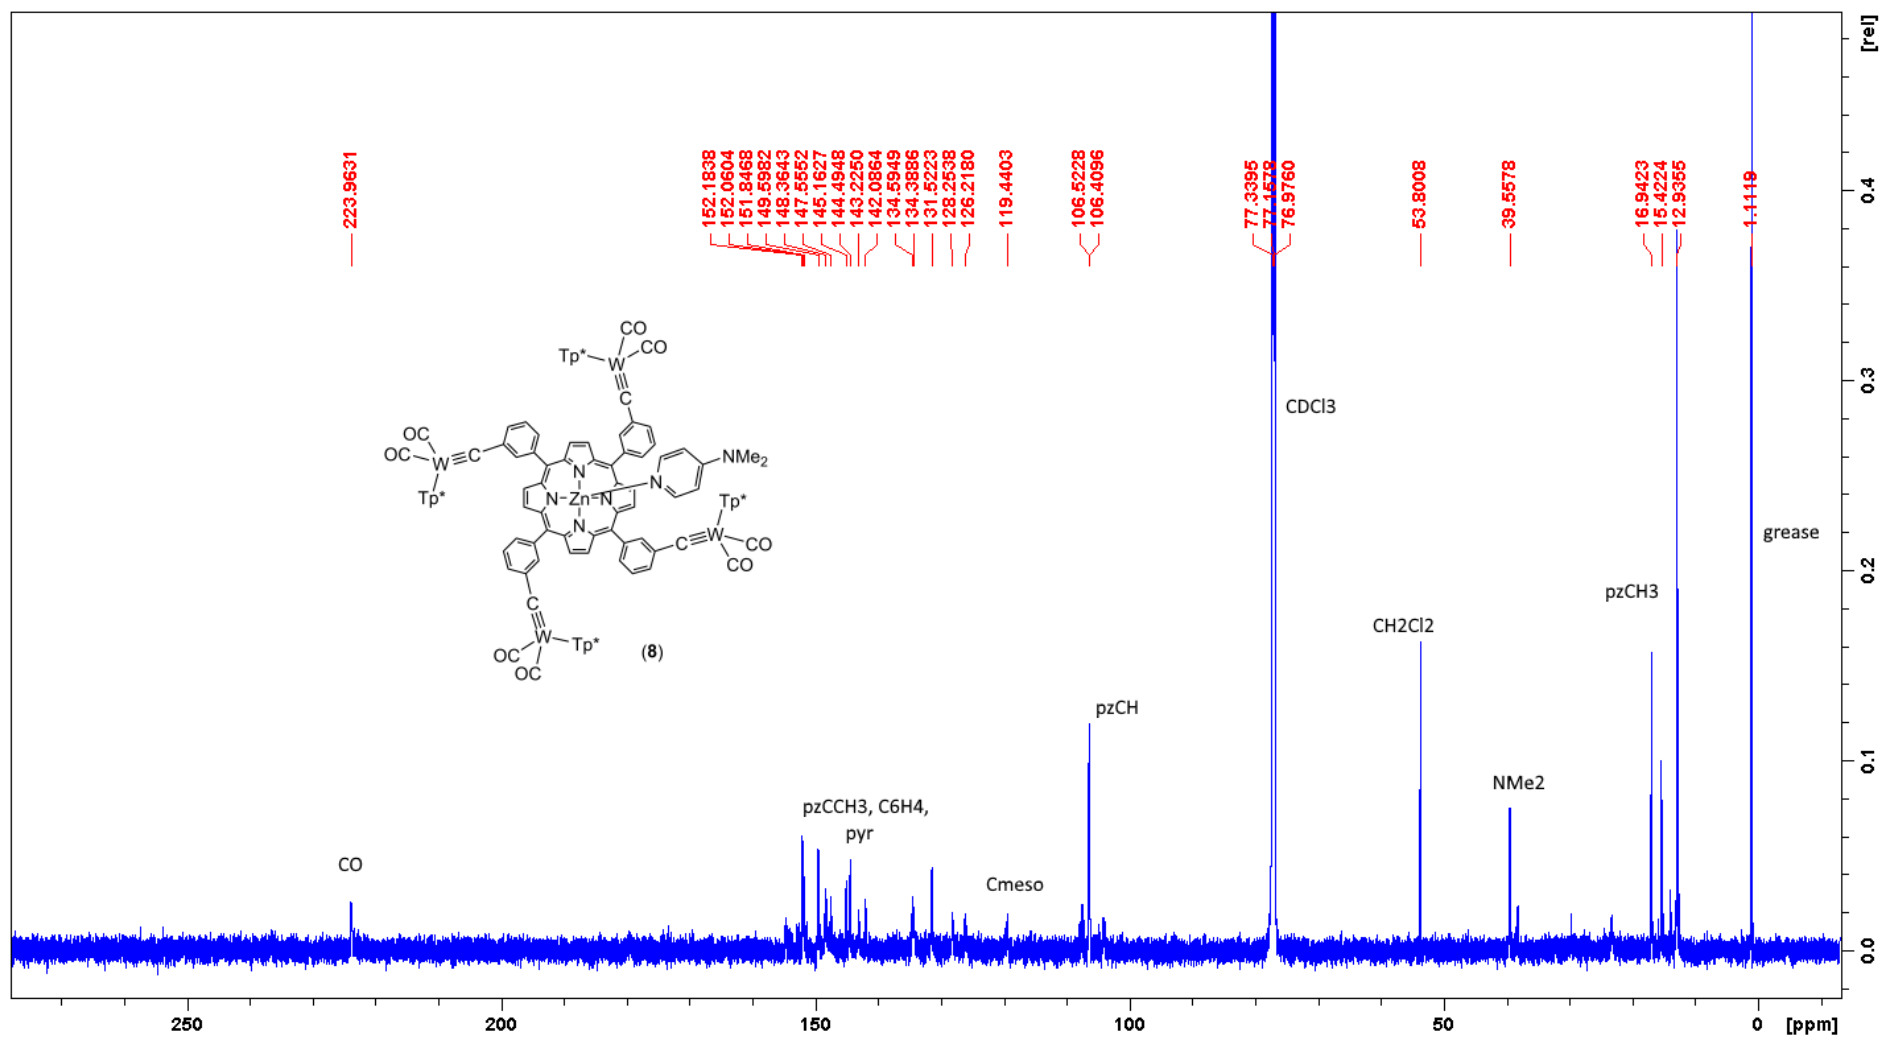

**Figure S20.**  $^{13}\text{C}\{^1\text{H}\}$  NMR spectrum (176 MHz,  $\text{CDCl}_3$ ,  $-60^\circ\text{C}$ ,  $\delta$ ) of **8** (**5** in the presence of excess 4-DMAP).

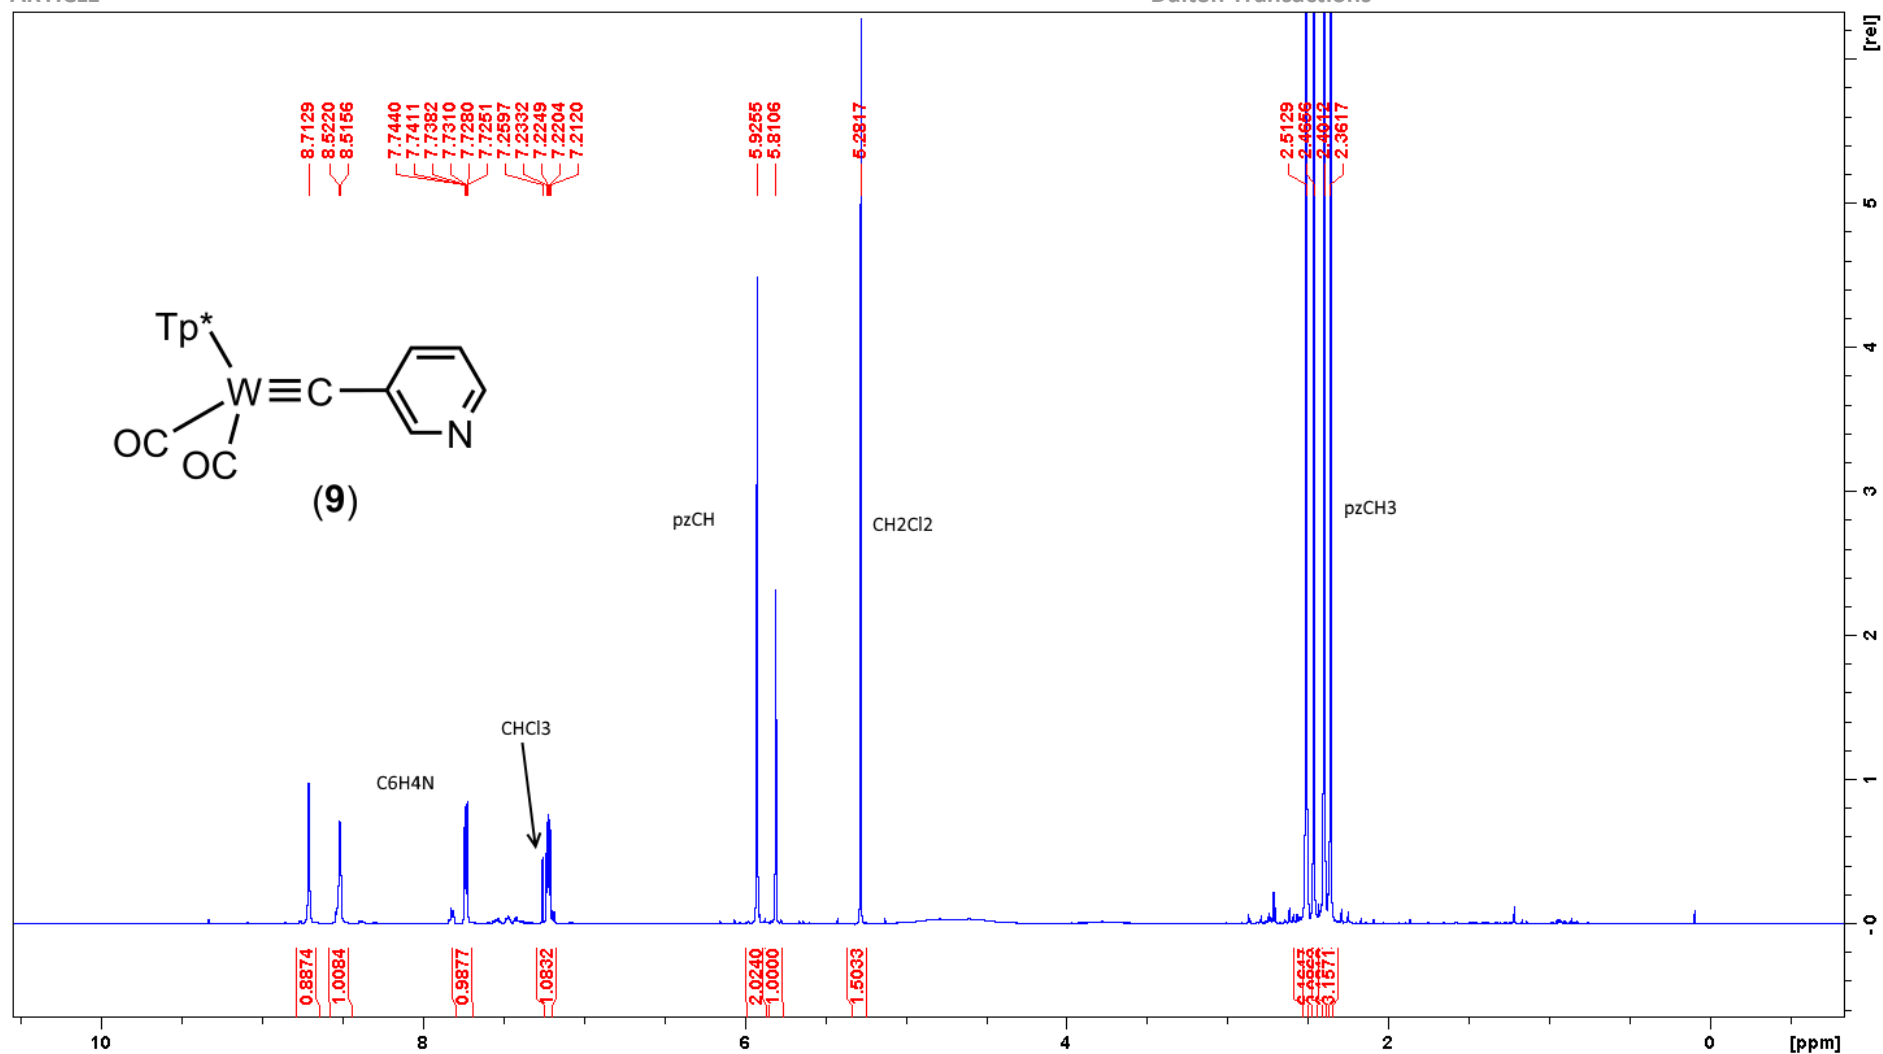

**Figure S21.** <sup>1</sup>H NMR spectrum (600 MHz, CDCl<sub>3</sub>, 25 °C, δ) of [NC<sub>5</sub>H<sub>4</sub>{C≡W(CO)<sub>2</sub>(Tp\*)}-3] (9).

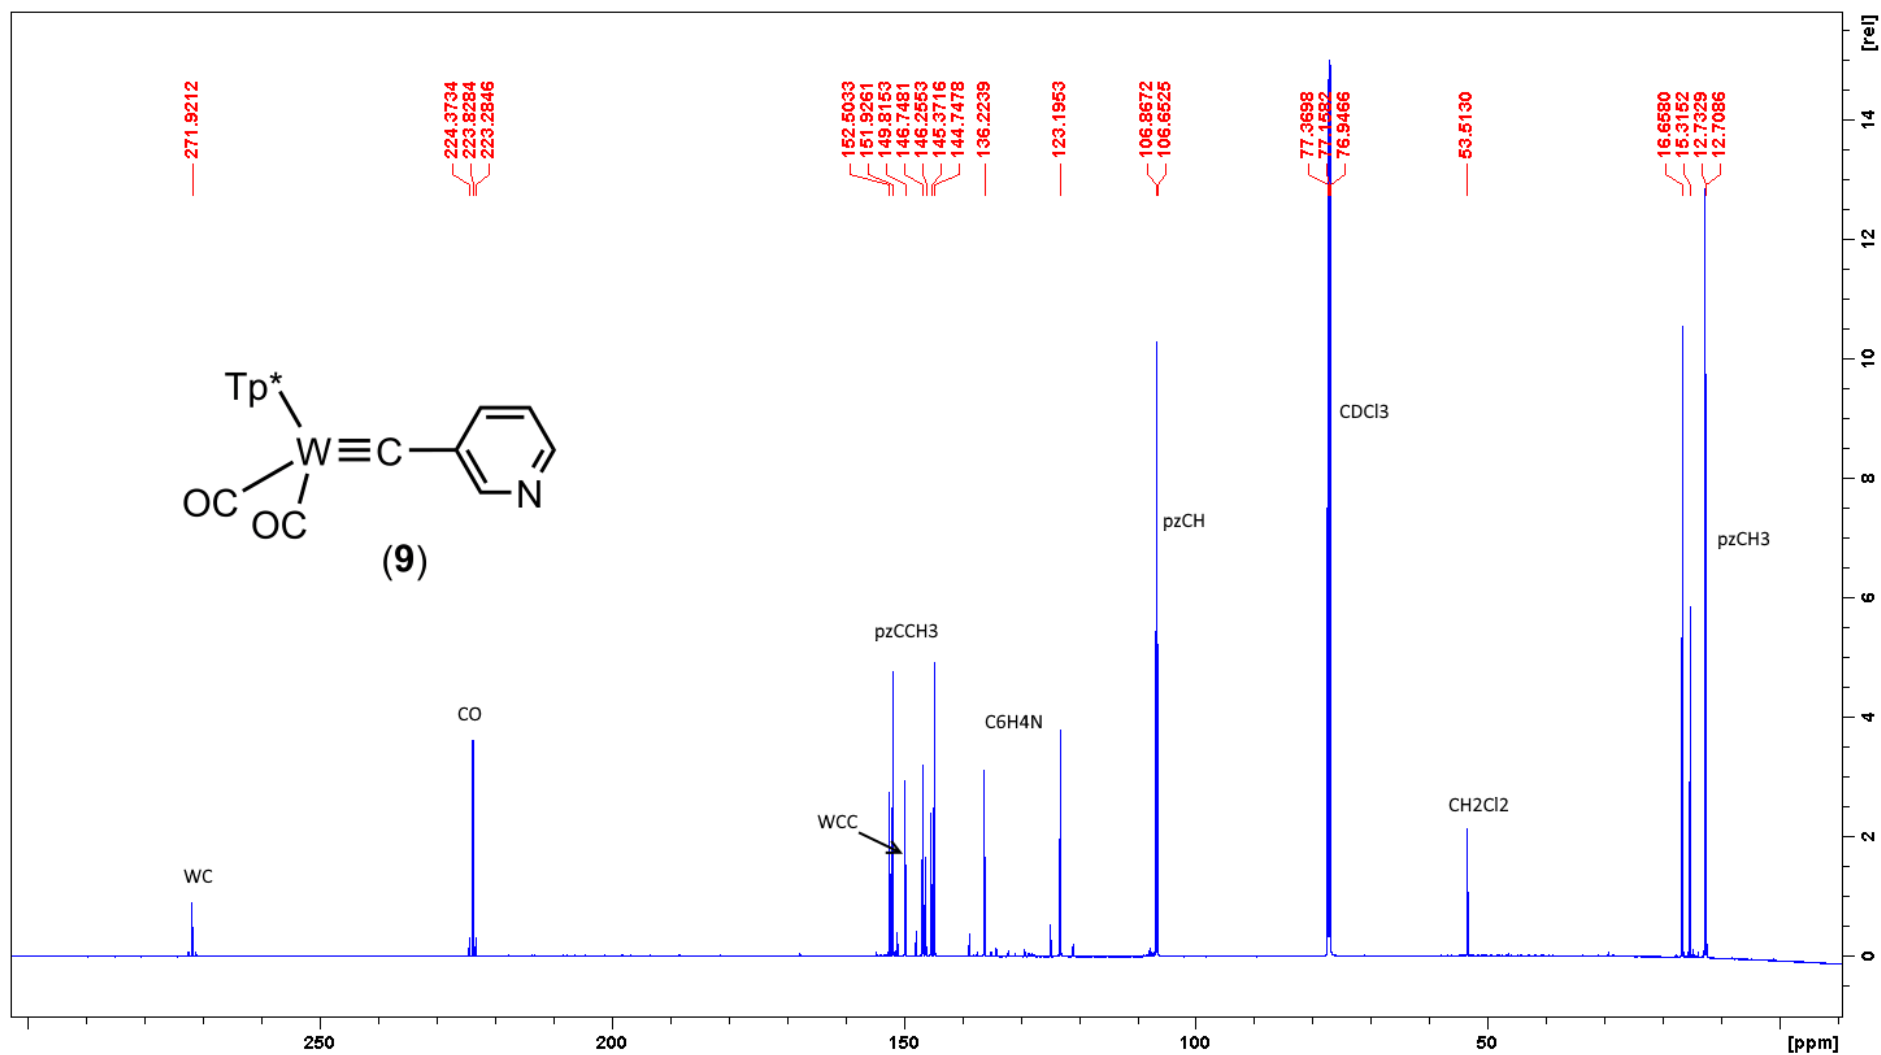

**Figure S22.**  $^{13}\text{C}\{^1\text{H}\}$  NMR spectrum (151 MHz,  $\text{CDCl}_3$ , 25 °C,  $\delta$ ) of  $[\text{NC}_5\text{H}_4\{\text{C}\equiv\text{W}(\text{CO})_2(\text{Tp}^*)\}-3]$  (9).

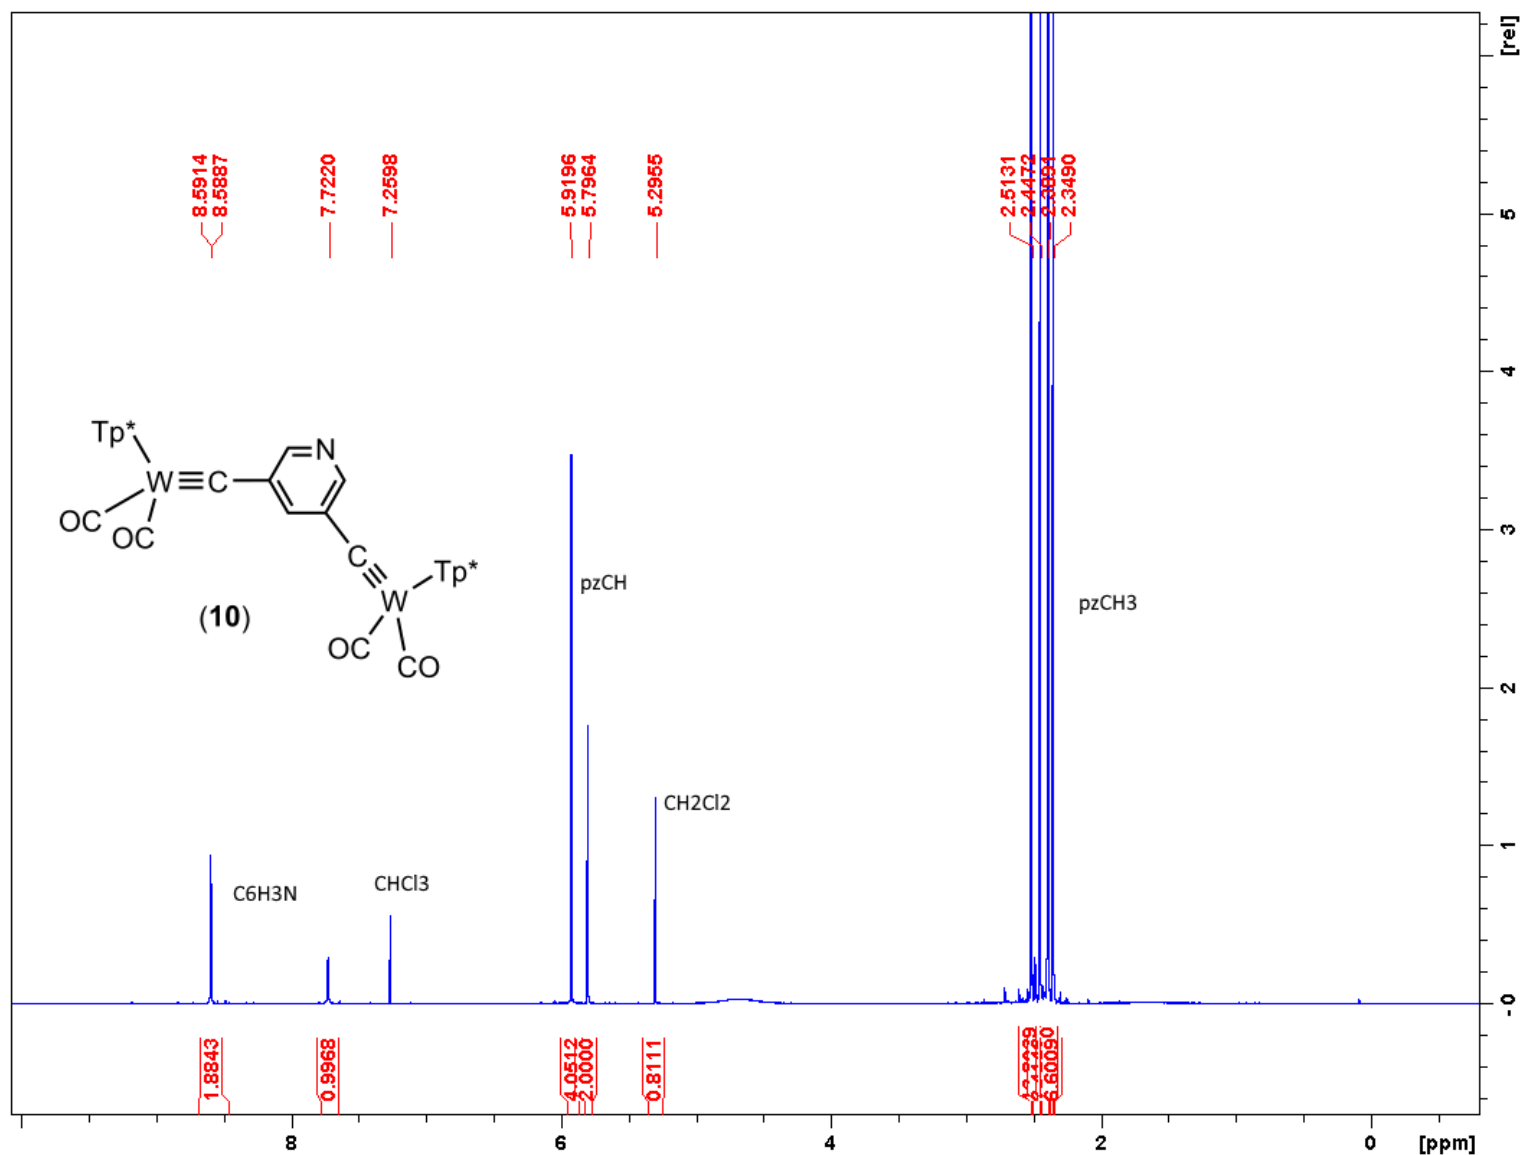



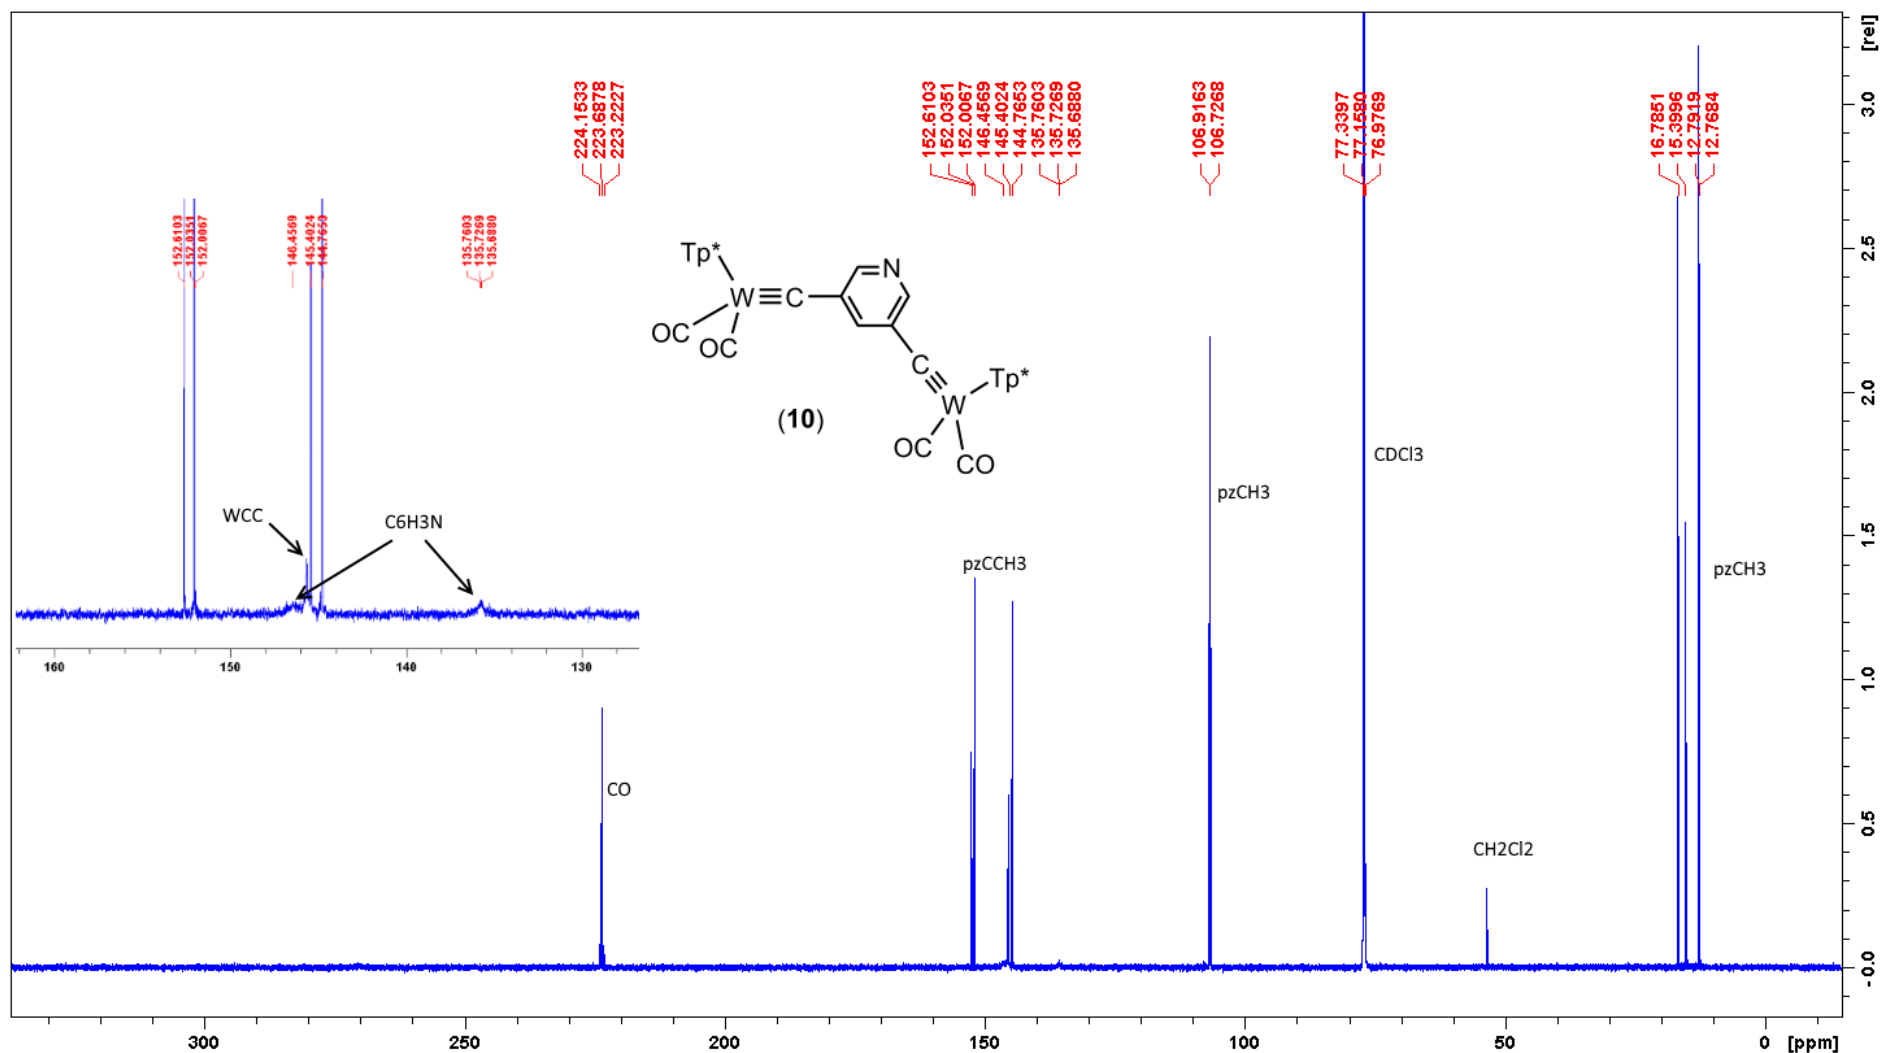

**Figure S24.**  $^{13}\text{C}\{^1\text{H}\}$  NMR spectrum (151 MHz,  $\text{CDCl}_3$ , 25 °C,  $\delta$ ) of  $[\text{NC}_5\text{H}_3\{\text{C}\equiv\text{W}(\text{CO})_2(\text{Tp}^*)\}_2-3,5]$  (10).

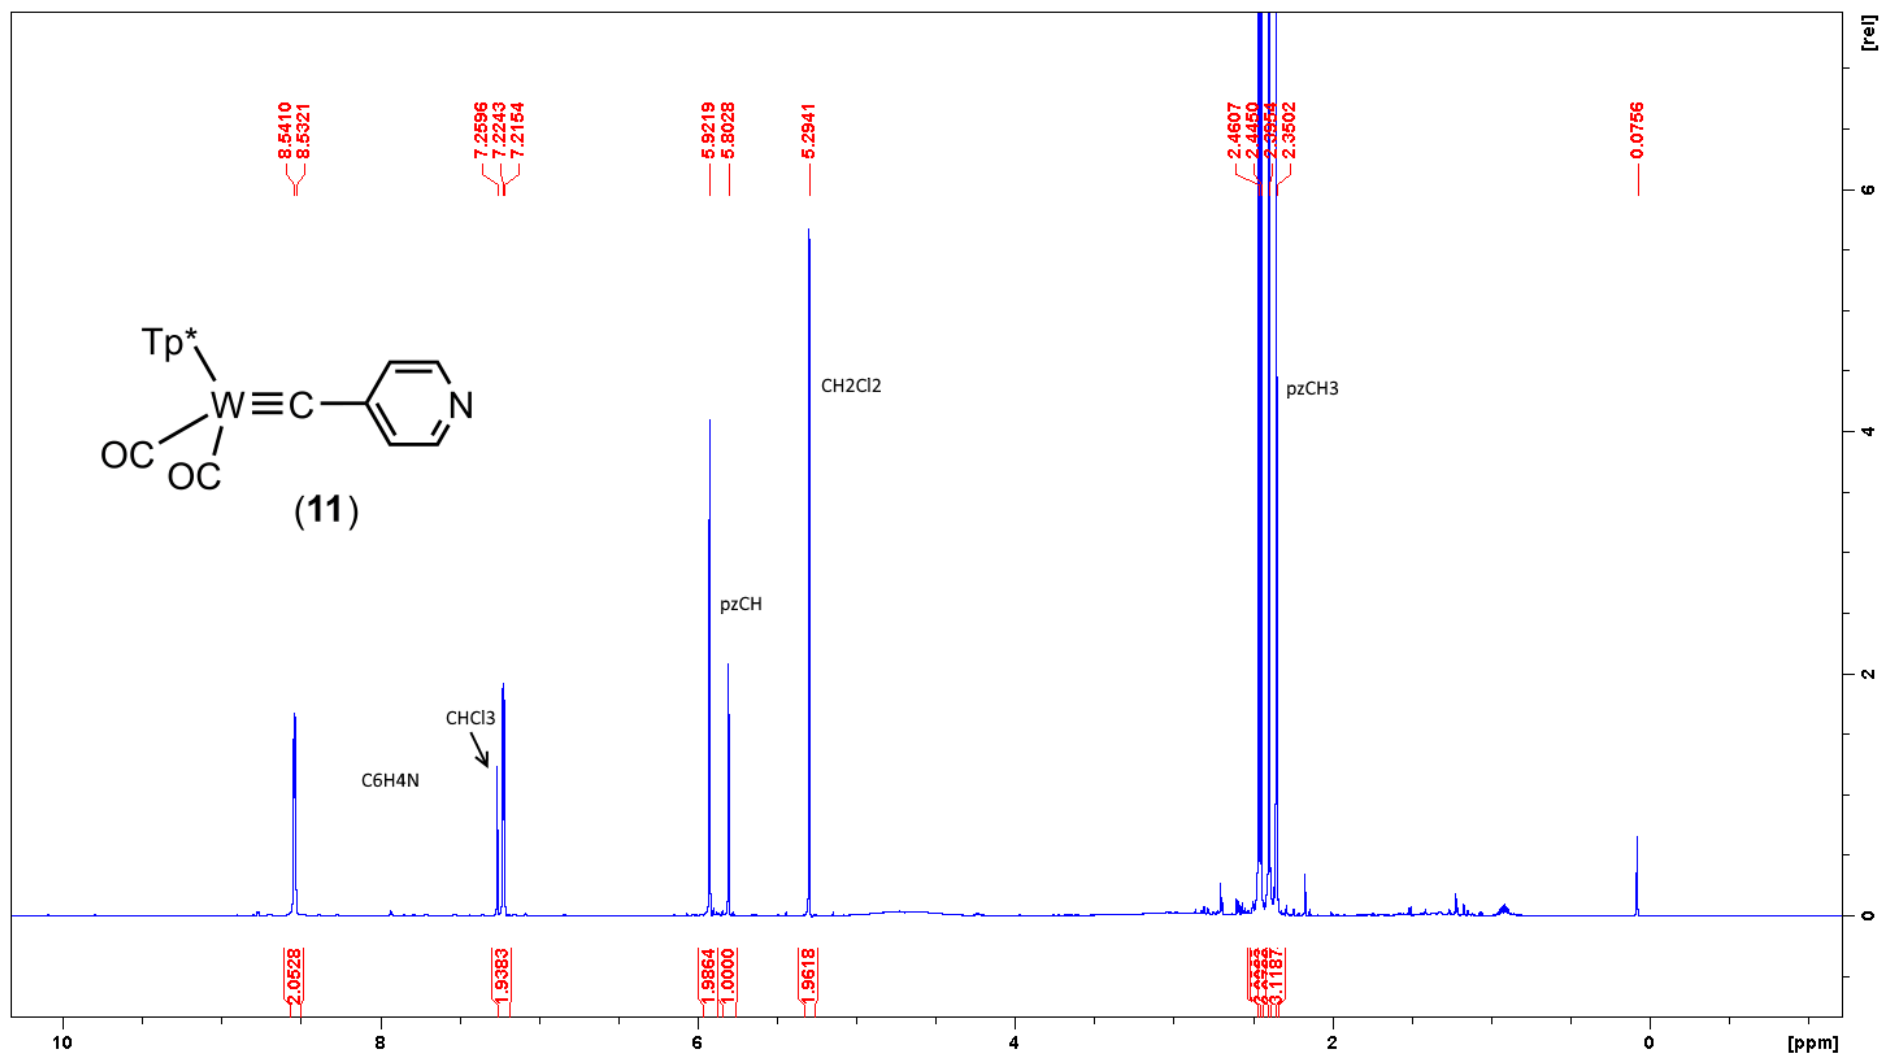

**Figure S25.**  $^1\text{H}$  NMR spectrum (400 MHz,  $\text{CDCl}_3$ , 25 °C,  $\delta$ ) of  $[\text{NC}_5\text{H}_4\{\text{C}\equiv\text{W}(\text{CO})_2(\text{Tp}^*)\}-4]$  (11).

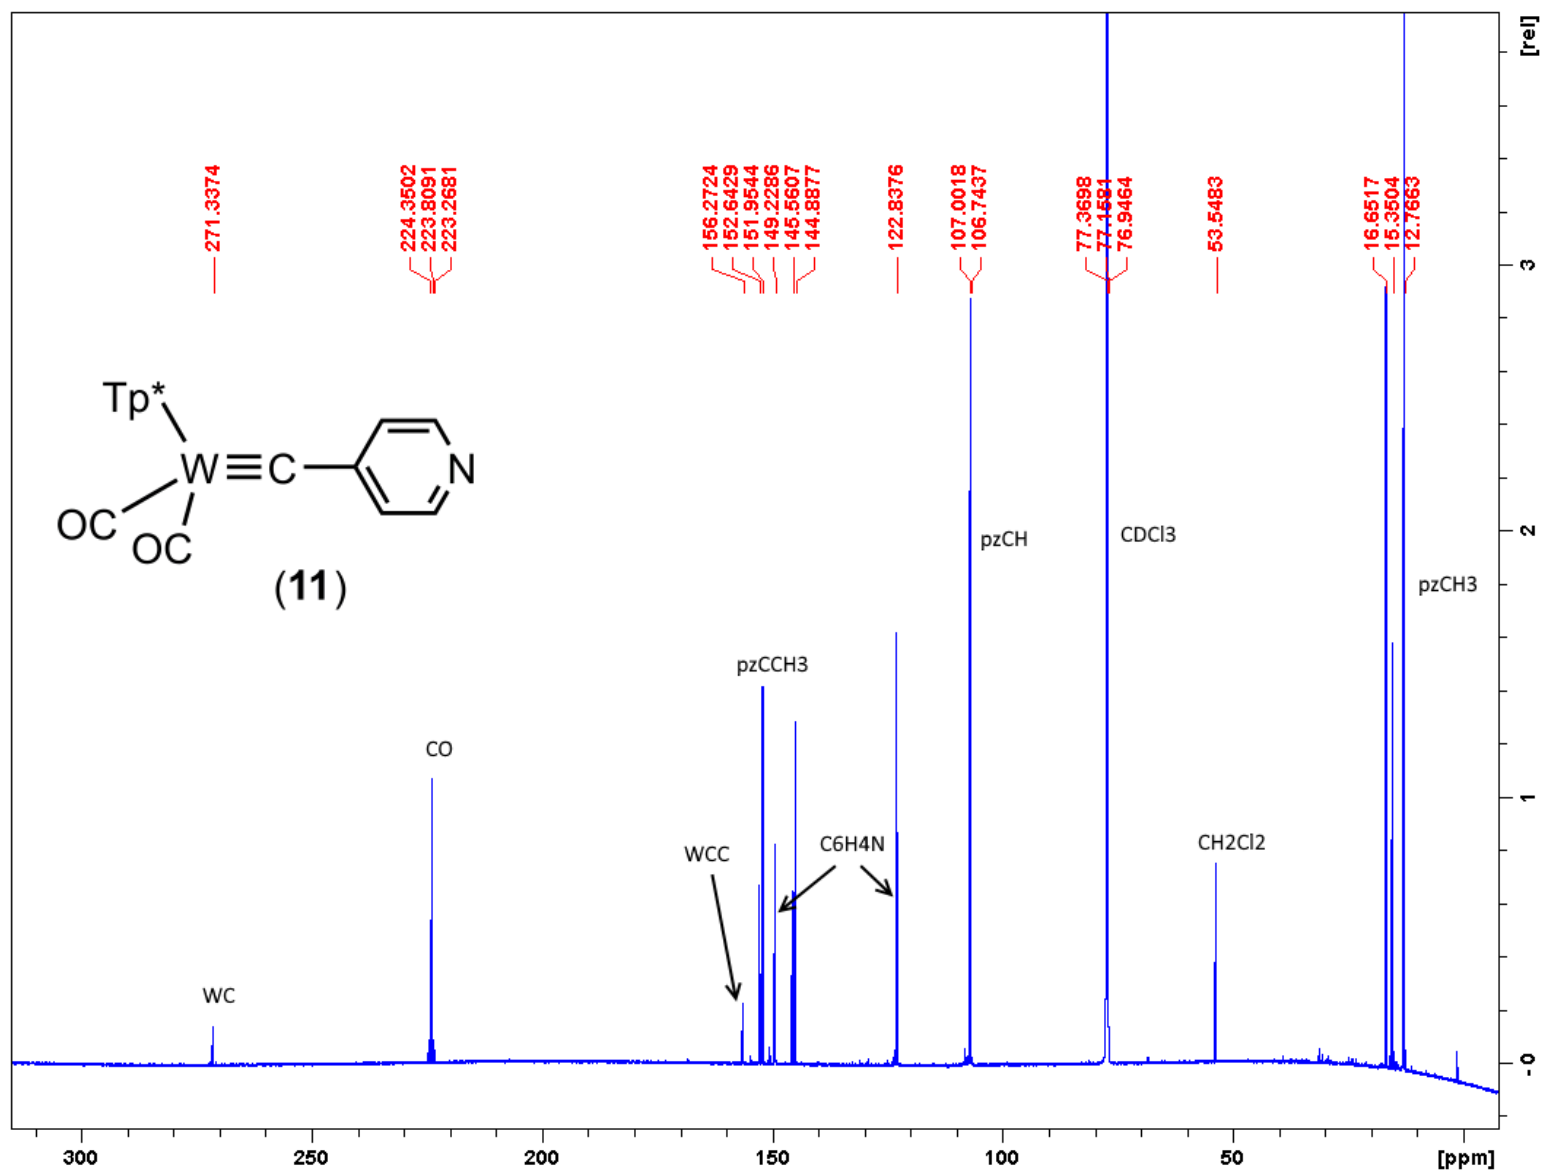

**Figure S26.**  $^{13}C\{^1H\}$  NMR spectrum (151 MHz,  $CDCl_3$ , 25 °C,  $\delta$ ) of  $[NC_5H_4\{C\equiv W(CO)_2(Tp^*)\}] \cdot 4$  (11).

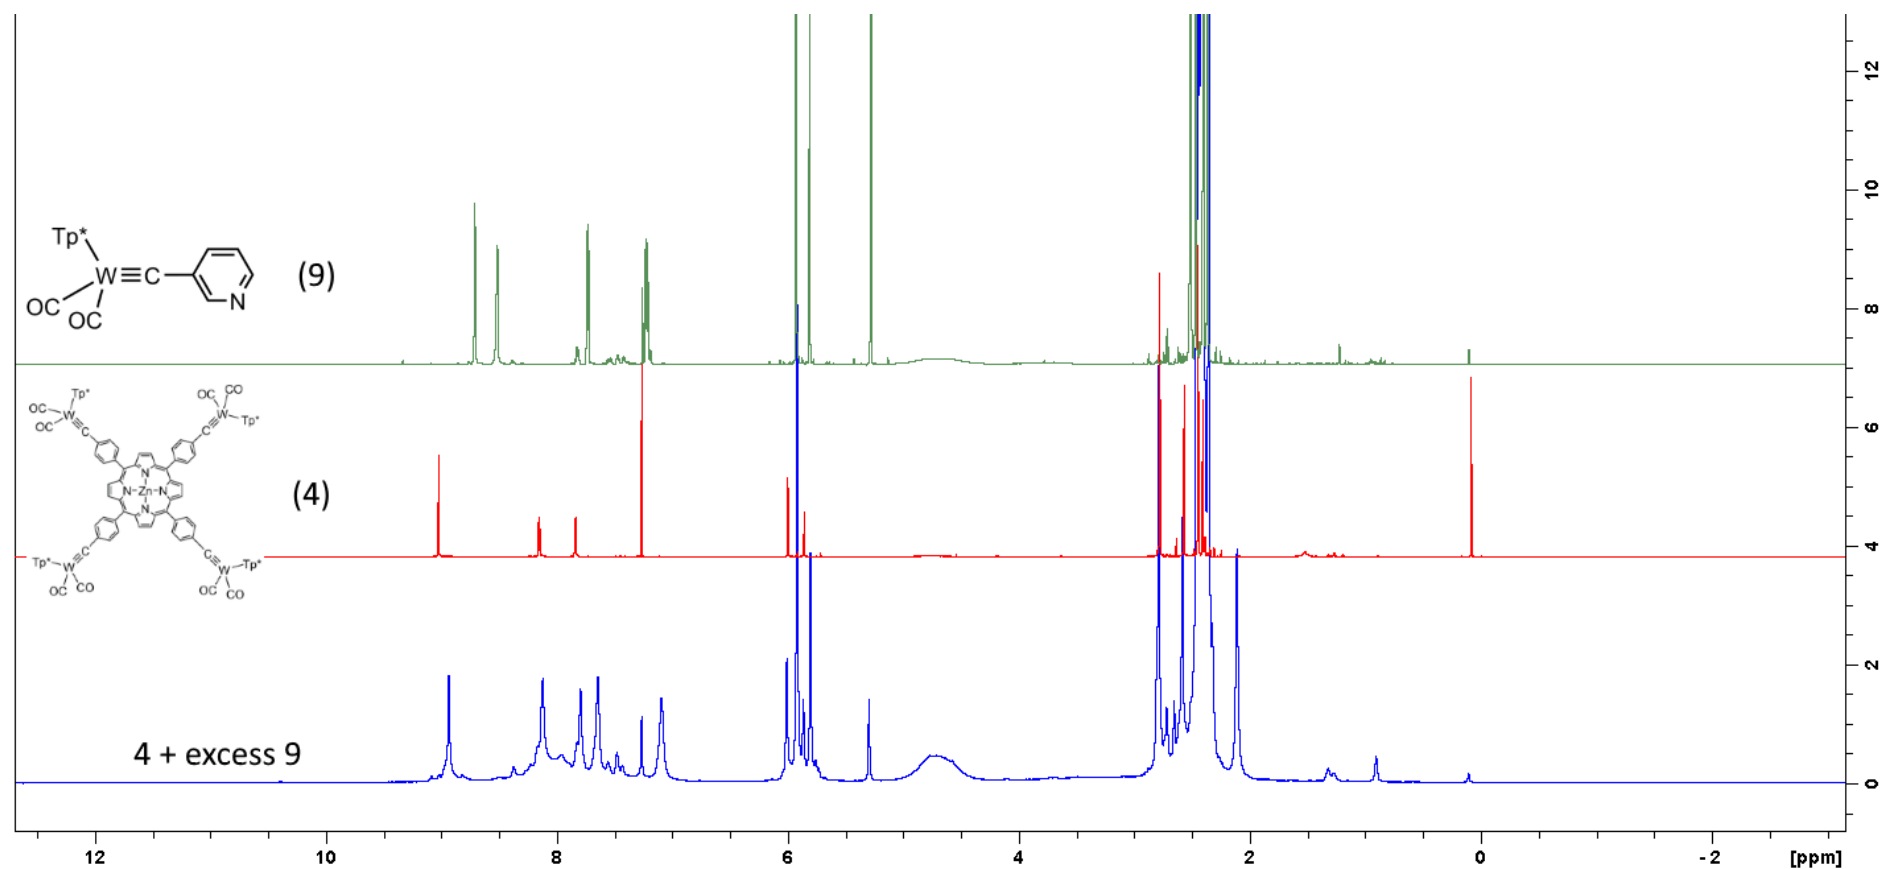

**Figure S27.** Comparison of  $^1\text{H}$  NMR spectra at 25 °C of **4**, **9** and a mixture of **4** and excess **9**.

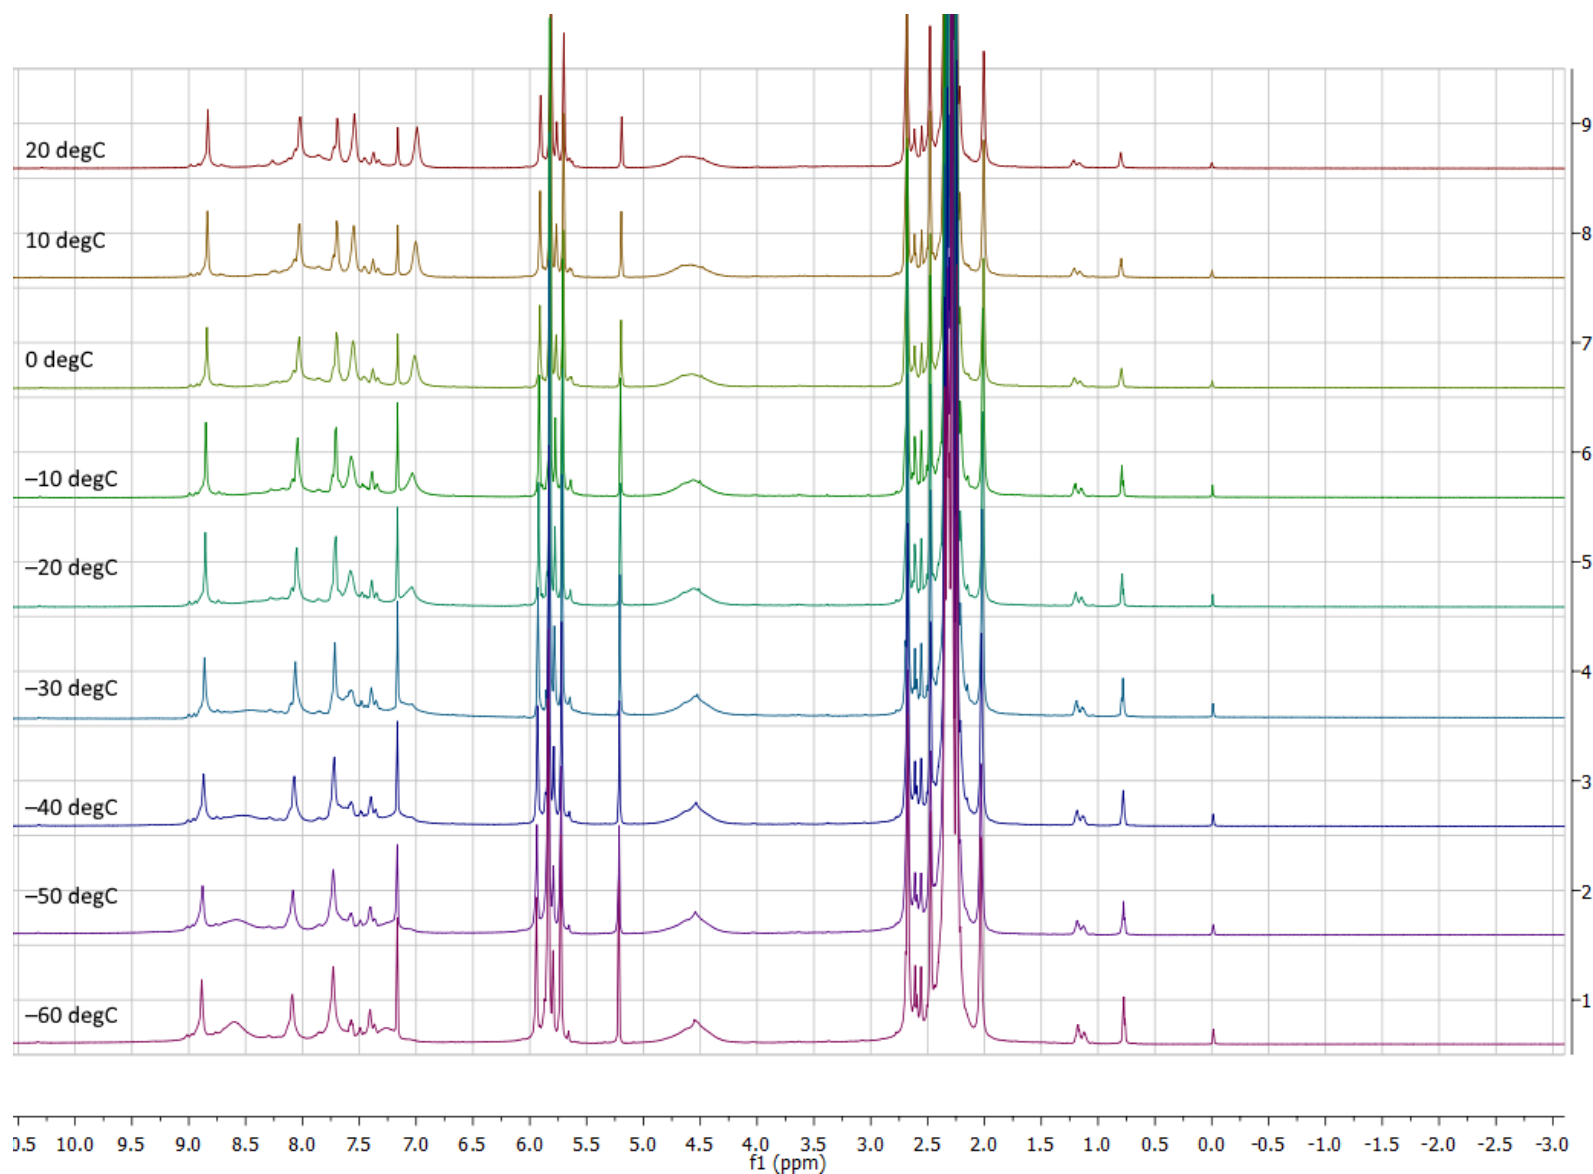

**Figure S28.** Variable-temperature  $^1\text{H}$  NMR spectrum (700 MHz,  $\text{CDCl}_3$ ,  $\delta$ ) of a mixture of **4** and excess **9**.

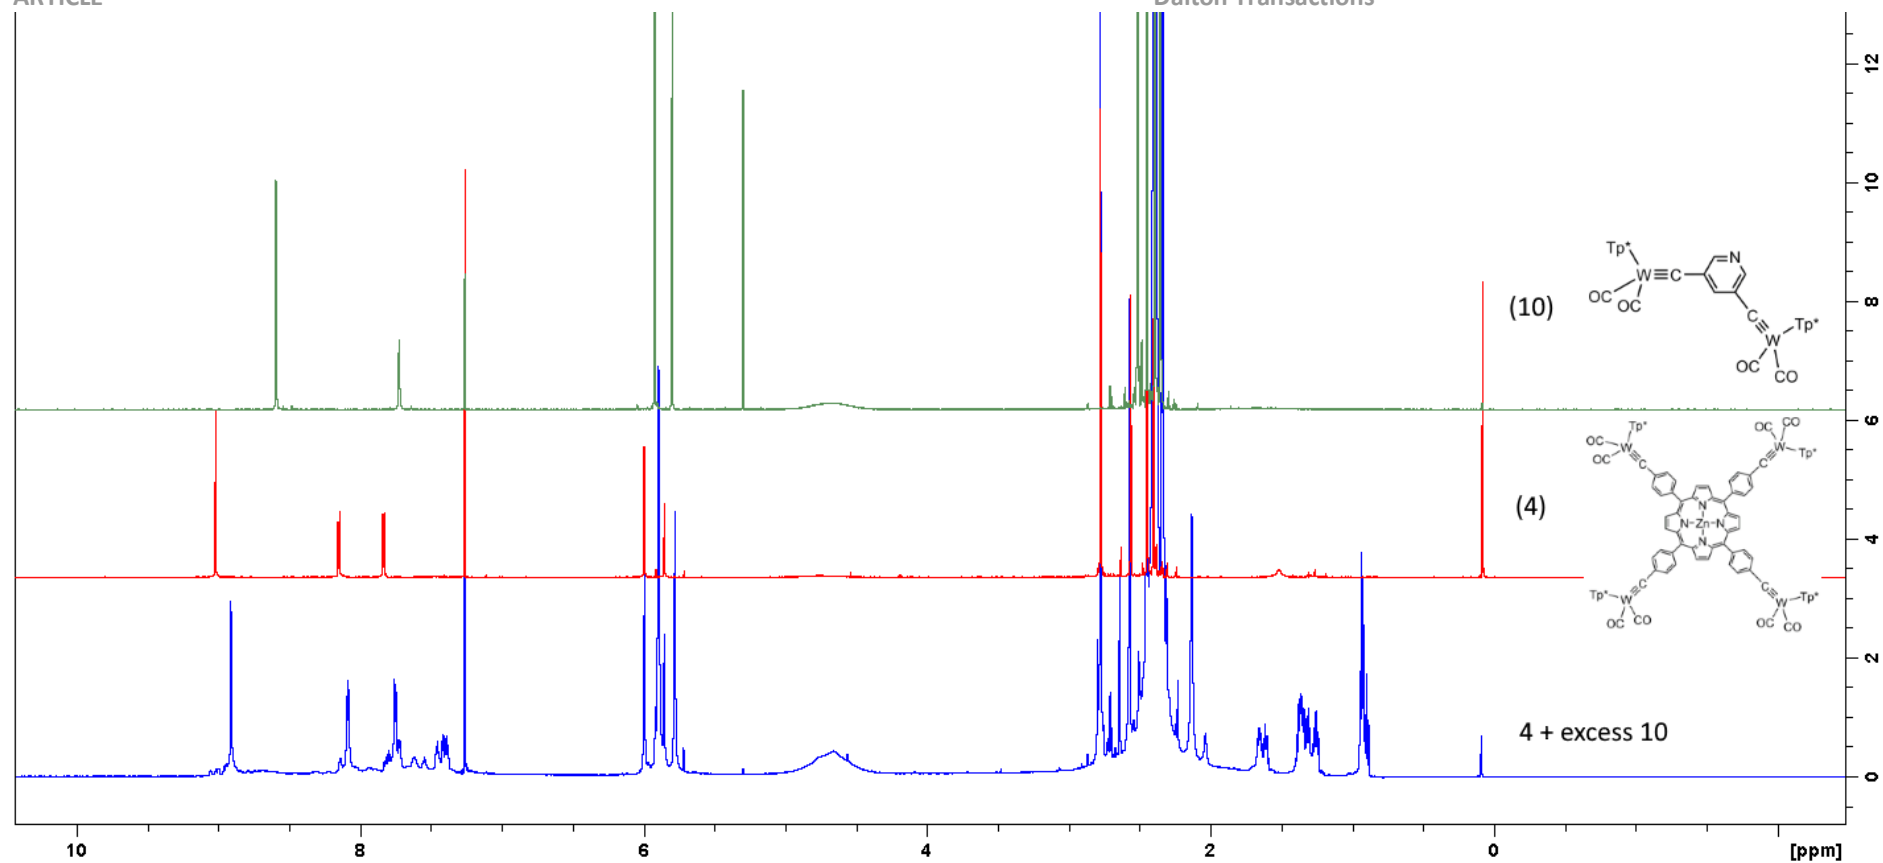

**Figure S29.** Comparison of  $^1\text{H}$  NMR spectra at 25 °C of **4**, **10** and a mixture of **4** containing excess **10**.

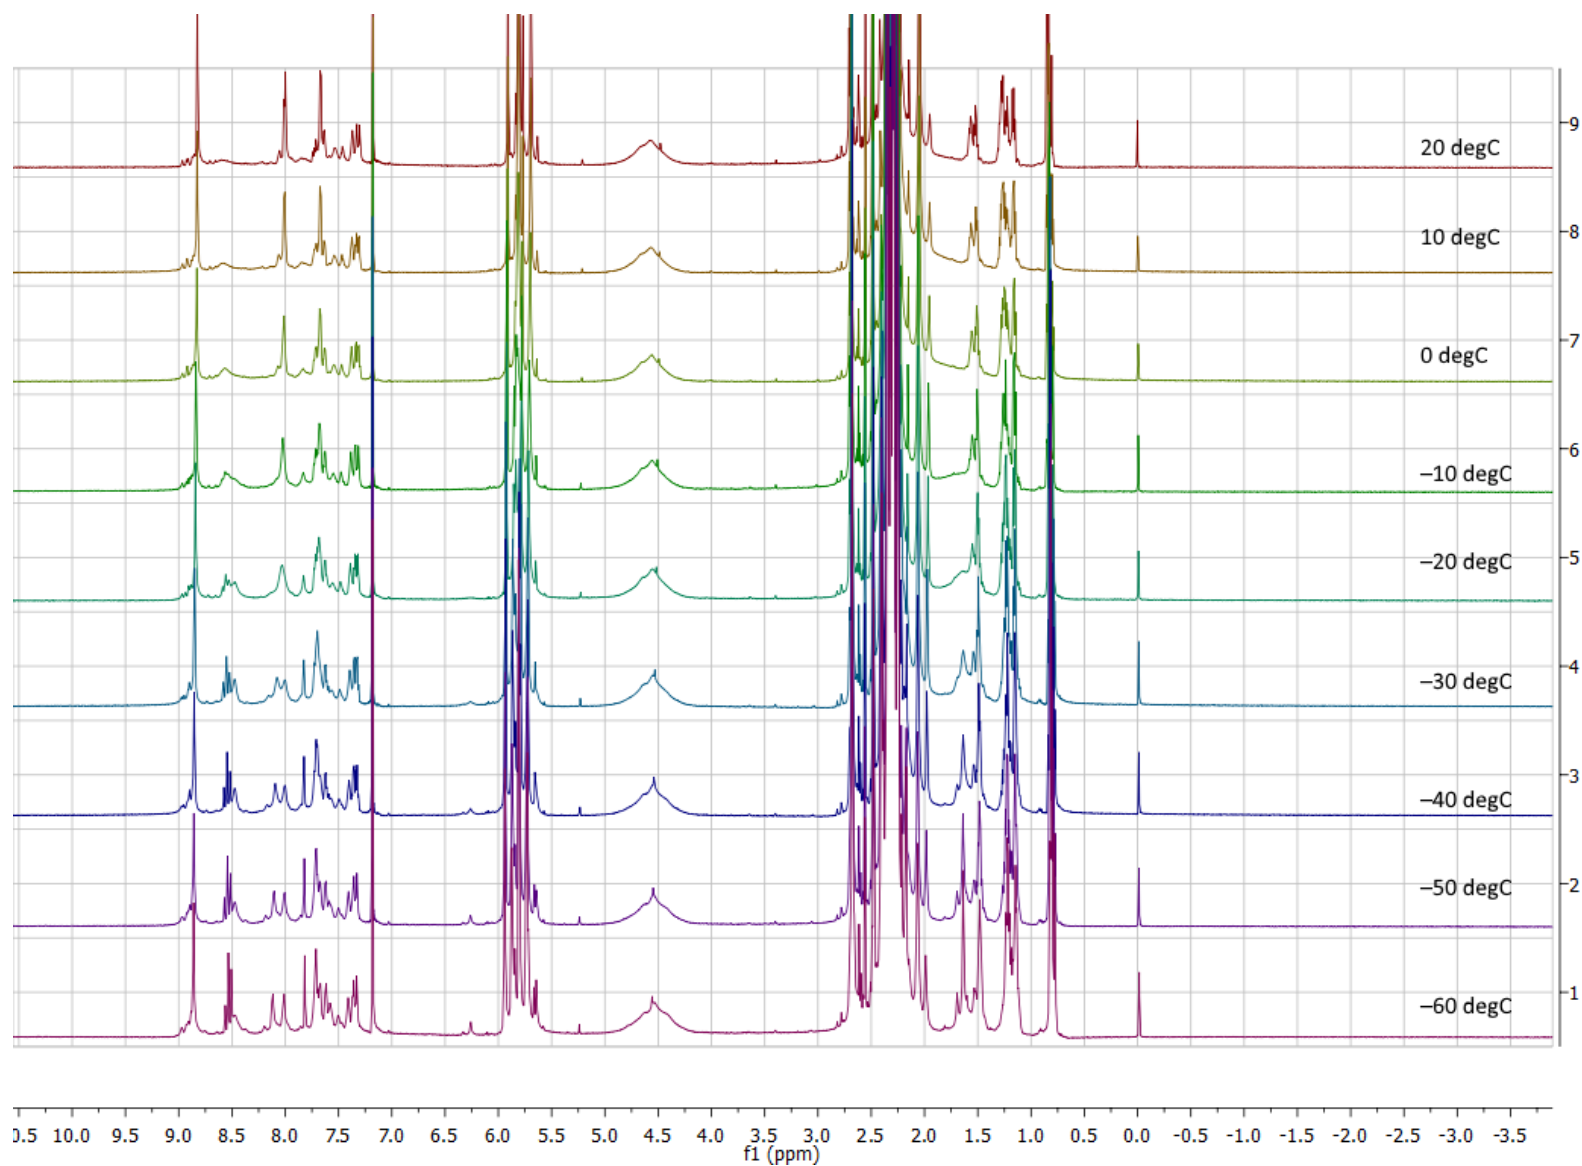

**Figure S30.** Variable-temperature  $^1\text{H}$  NMR spectrum (700 MHz,  $\text{CDCl}_3$ ,  $\delta$ ) of a solution of **4** containing excess **10**.

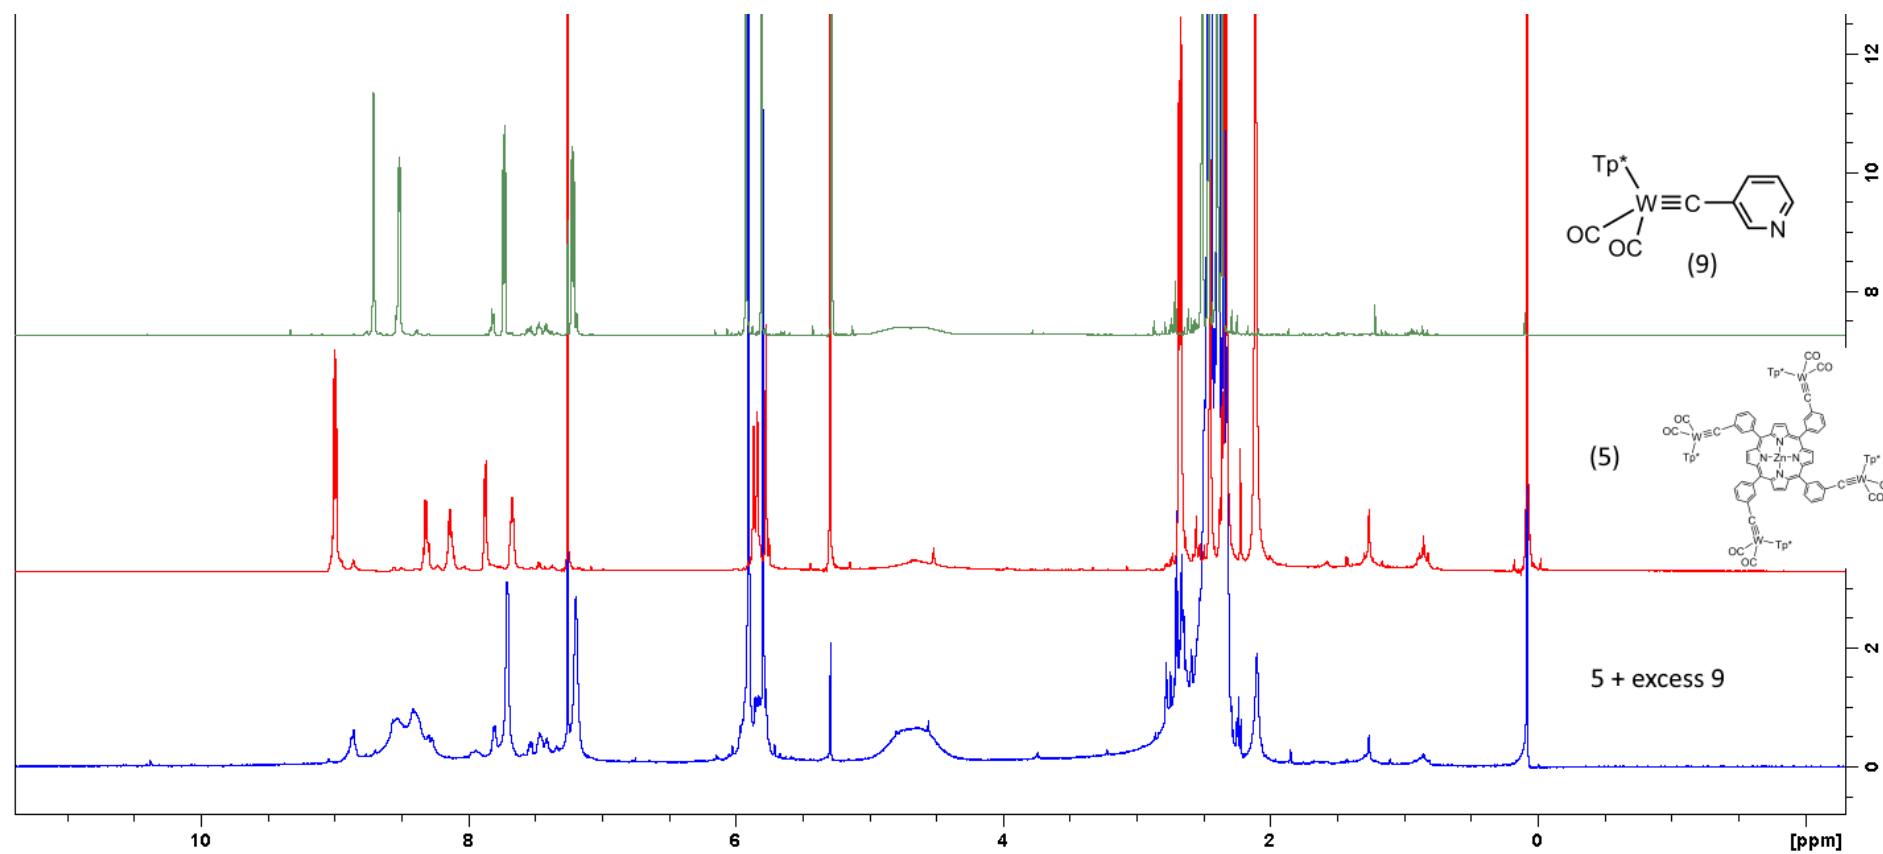



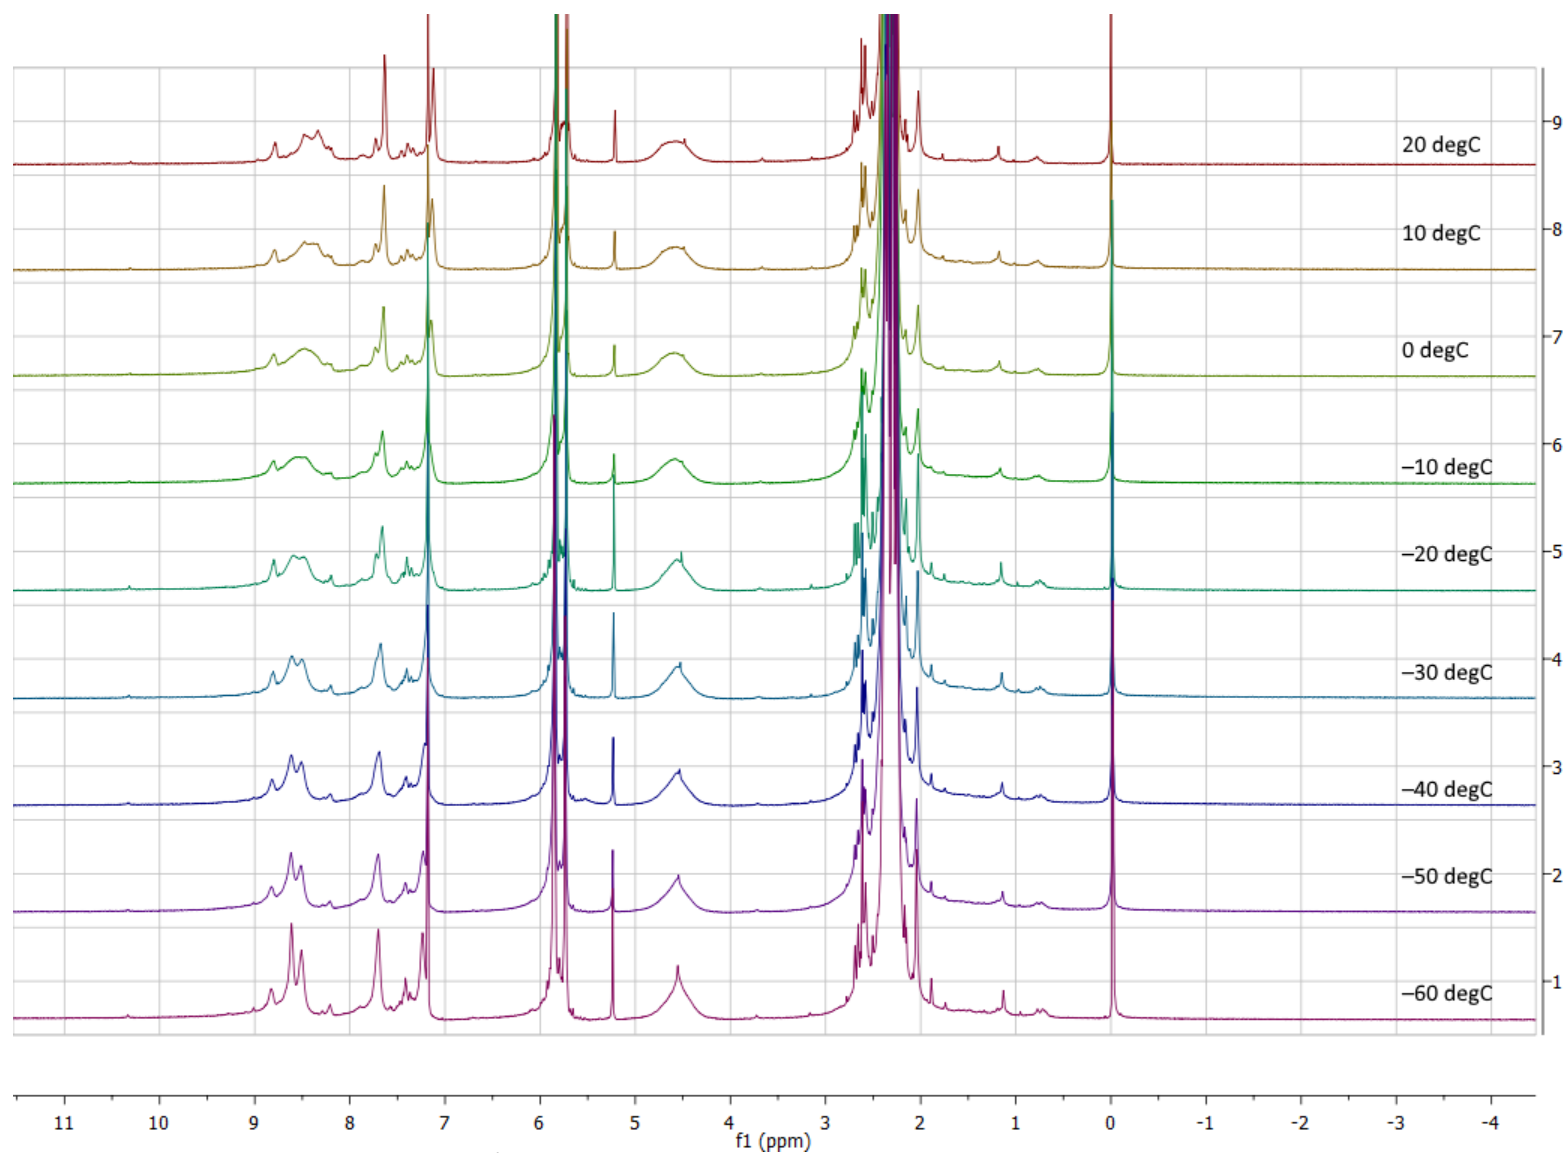

**Figure S32.** Variable-temperature  $^1\text{H}$  NMR spectrum (700 MHz,  $\text{CDCl}_3$ ,  $\delta$ ) of a mixture of **5** and excess **9**.

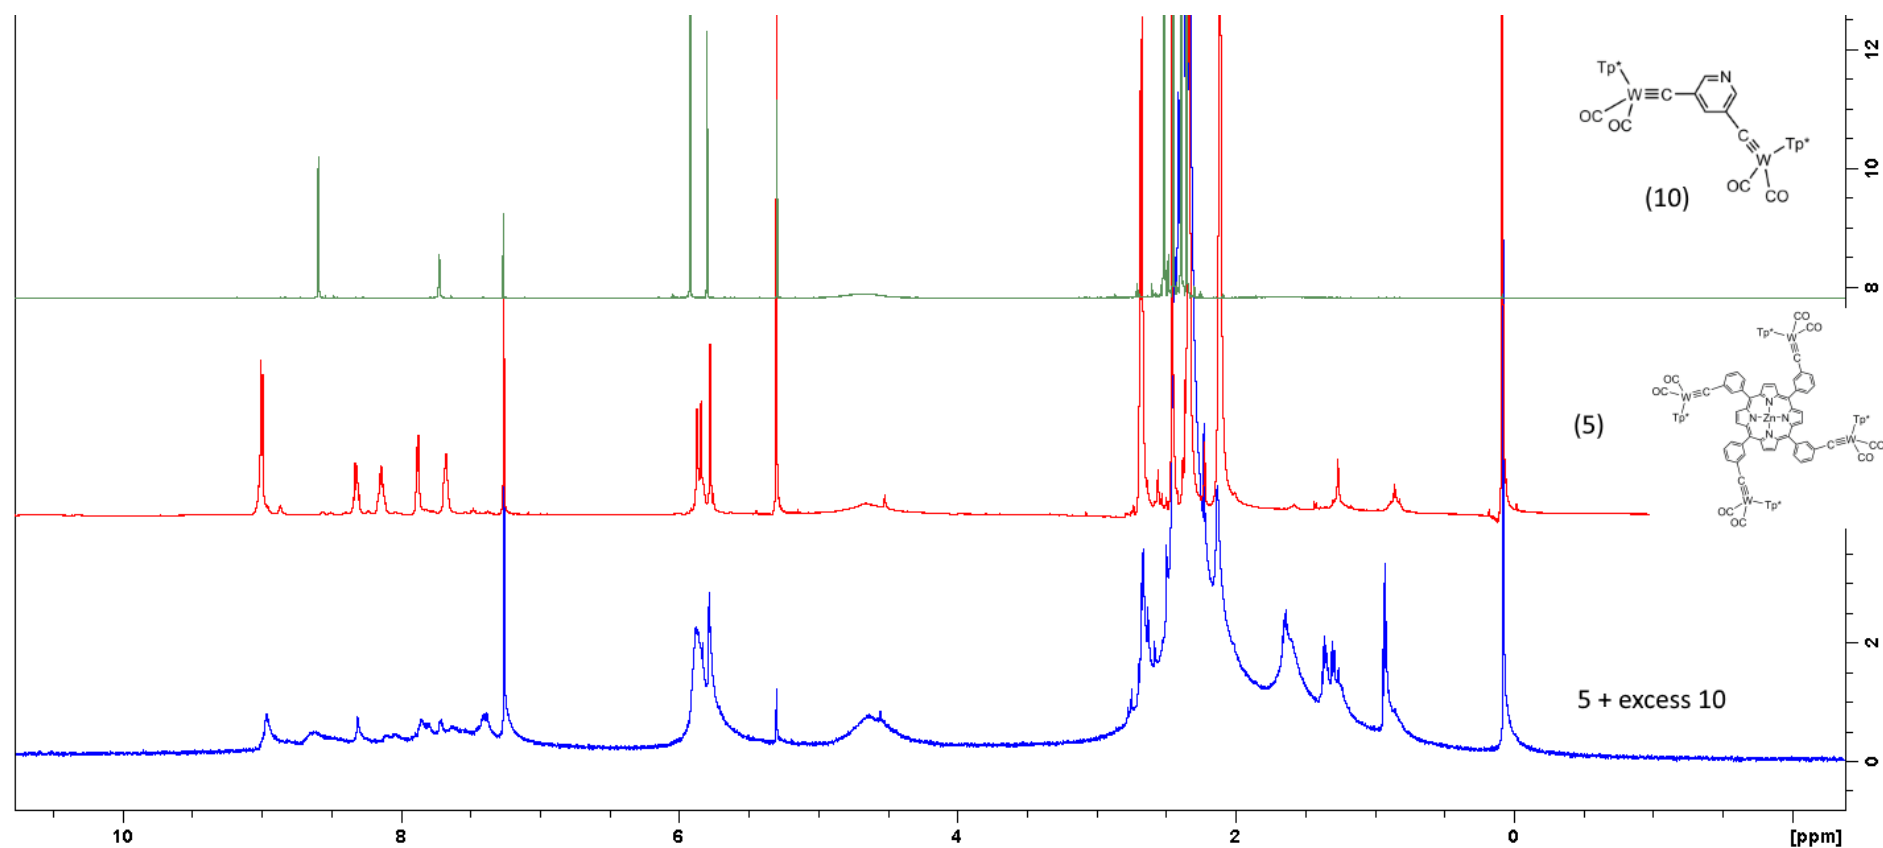

**Figure S33.** Comparison of  $^1\text{H}$  NMR spectra at 25 °C of **5**, **10** and a mixture of **5** and excess **10**.

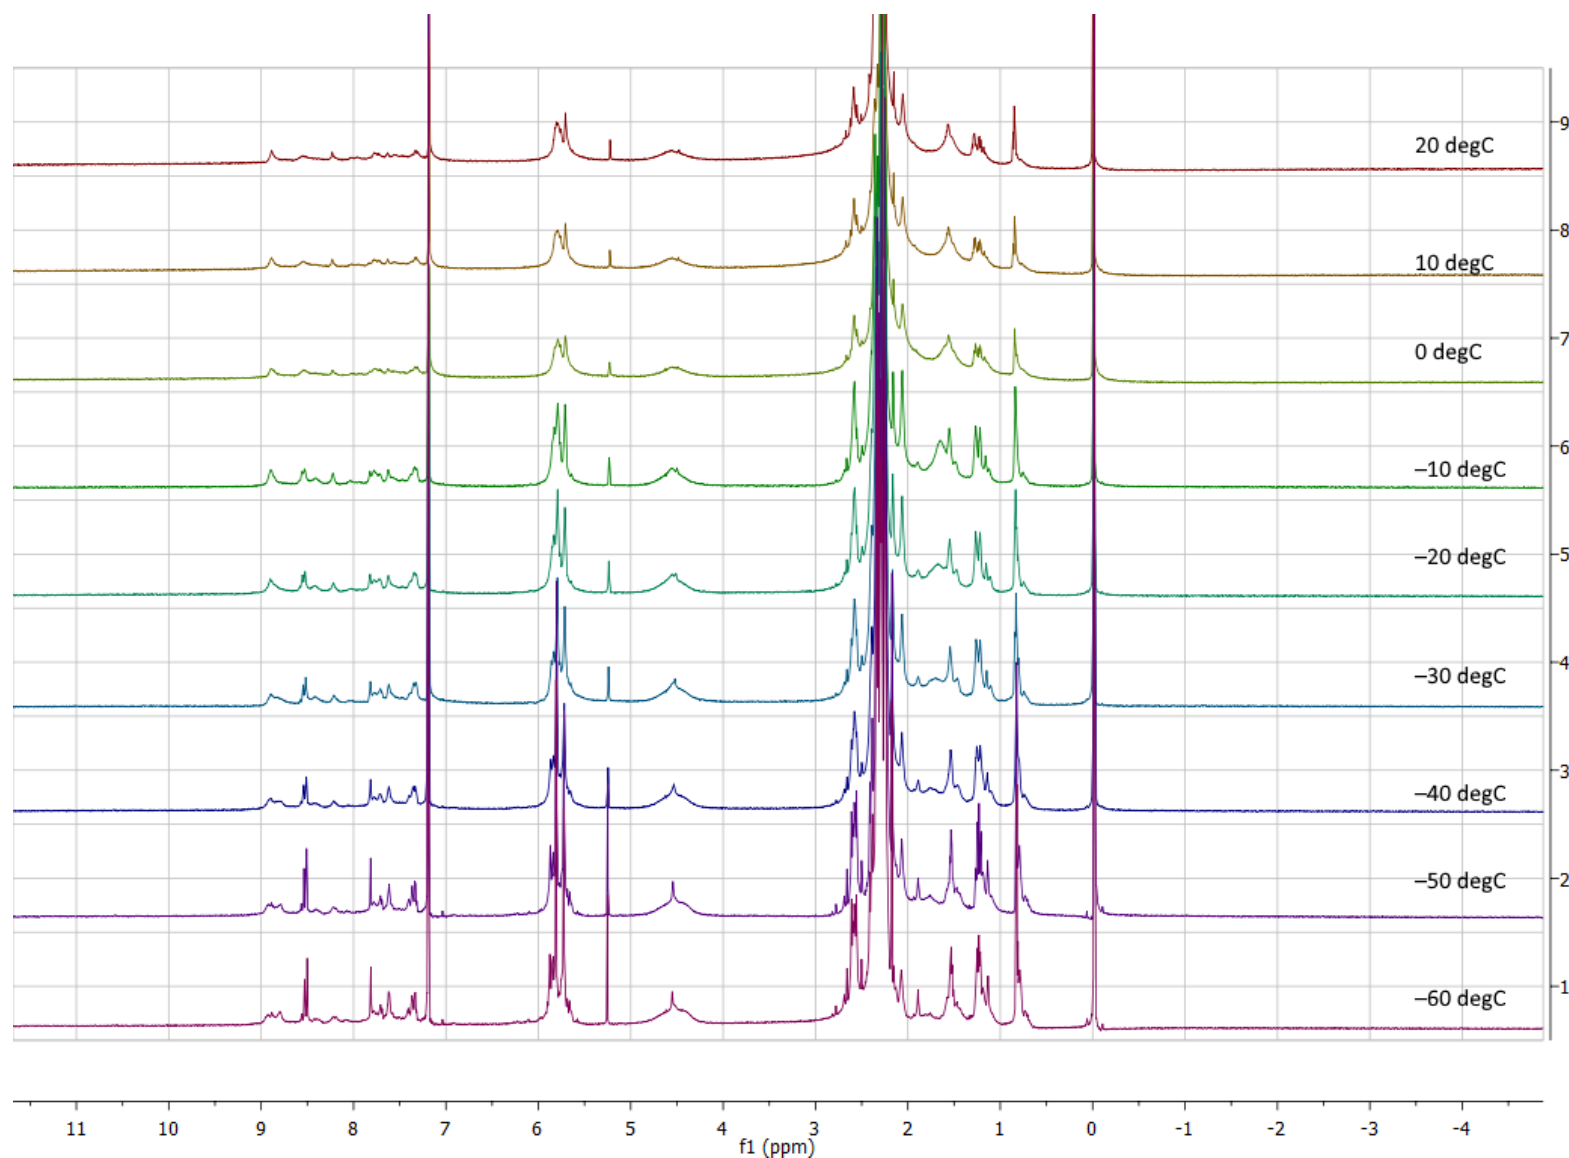

**Figure S34.** Variable-temperature  $^1\text{H}$  NMR spectrum (700 MHz,  $\text{CDCl}_3$ ,  $\delta$ ) of a mixture of **5** and excess **10**.

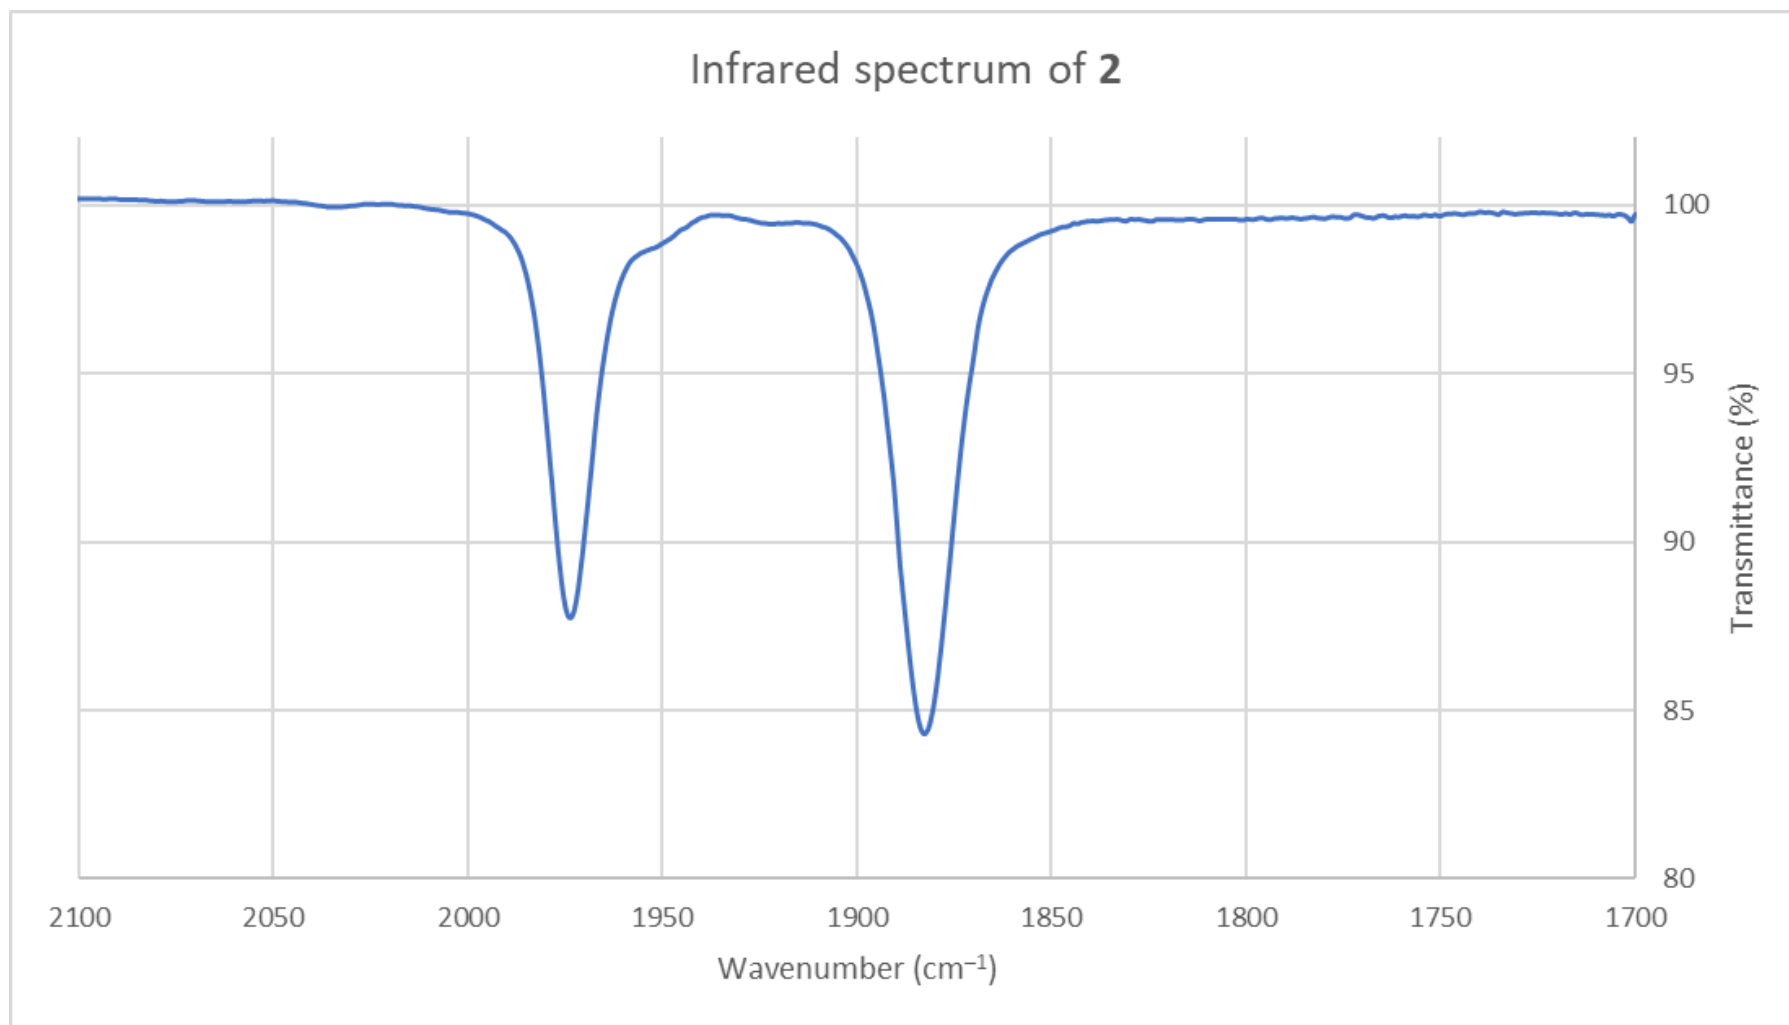

**Figure S35.** Infrared spectrum (CH<sub>2</sub>Cl<sub>2</sub>, cm<sup>-1</sup>) of **2**.

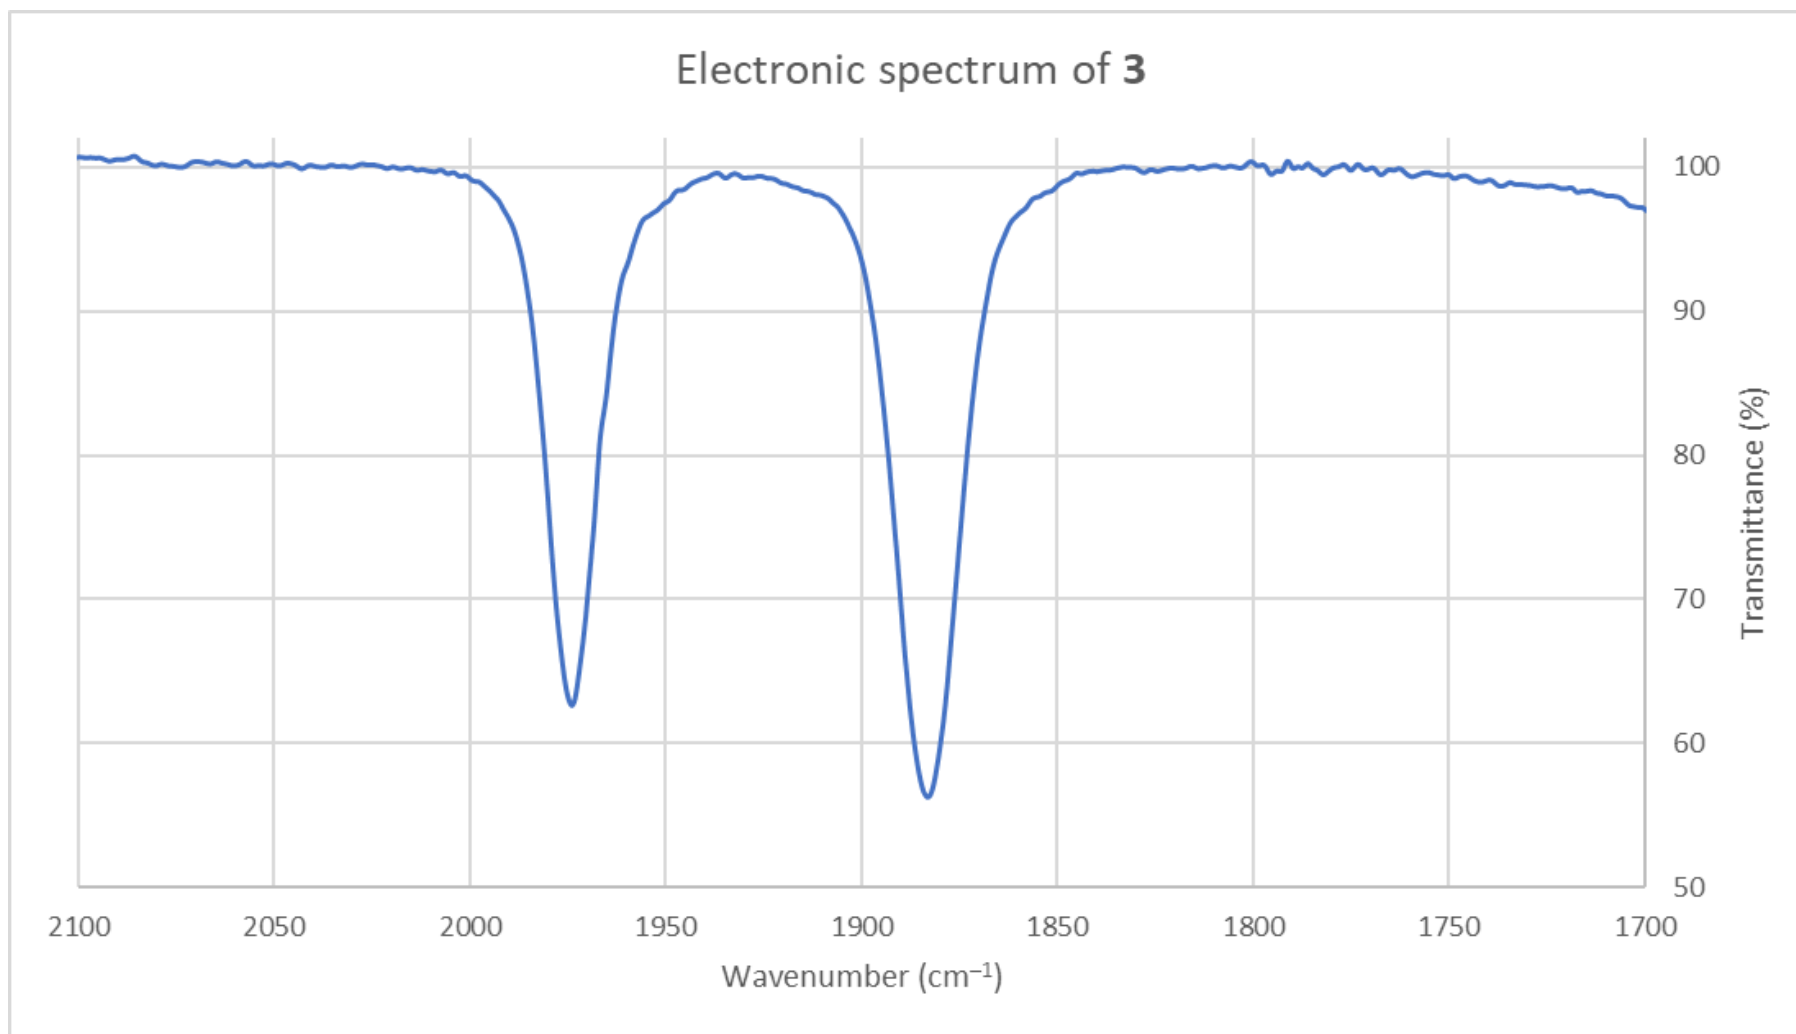

**Figure S36.** Infrared spectrum (CH<sub>2</sub>Cl<sub>2</sub>, cm<sup>-1</sup>) of **3**.

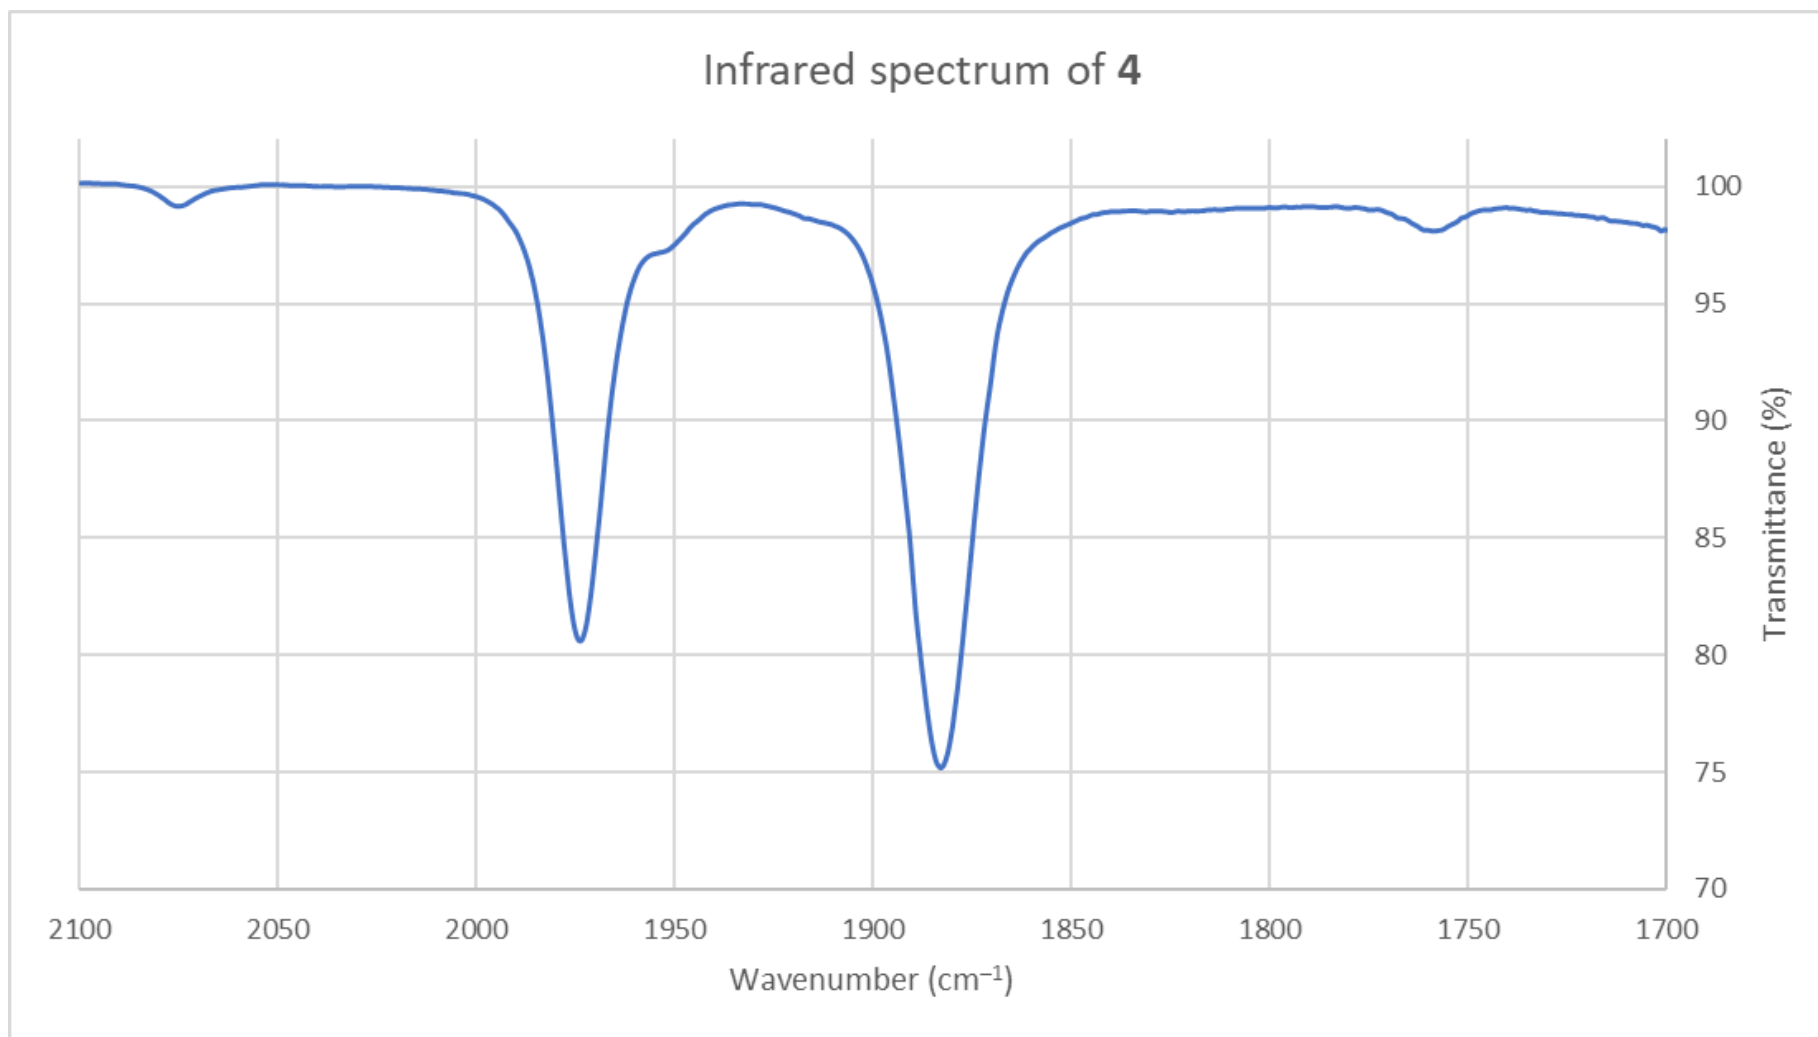

**Figure S37.** Infrared spectrum (CH<sub>2</sub>Cl<sub>2</sub>, cm<sup>-1</sup>) of **4**.

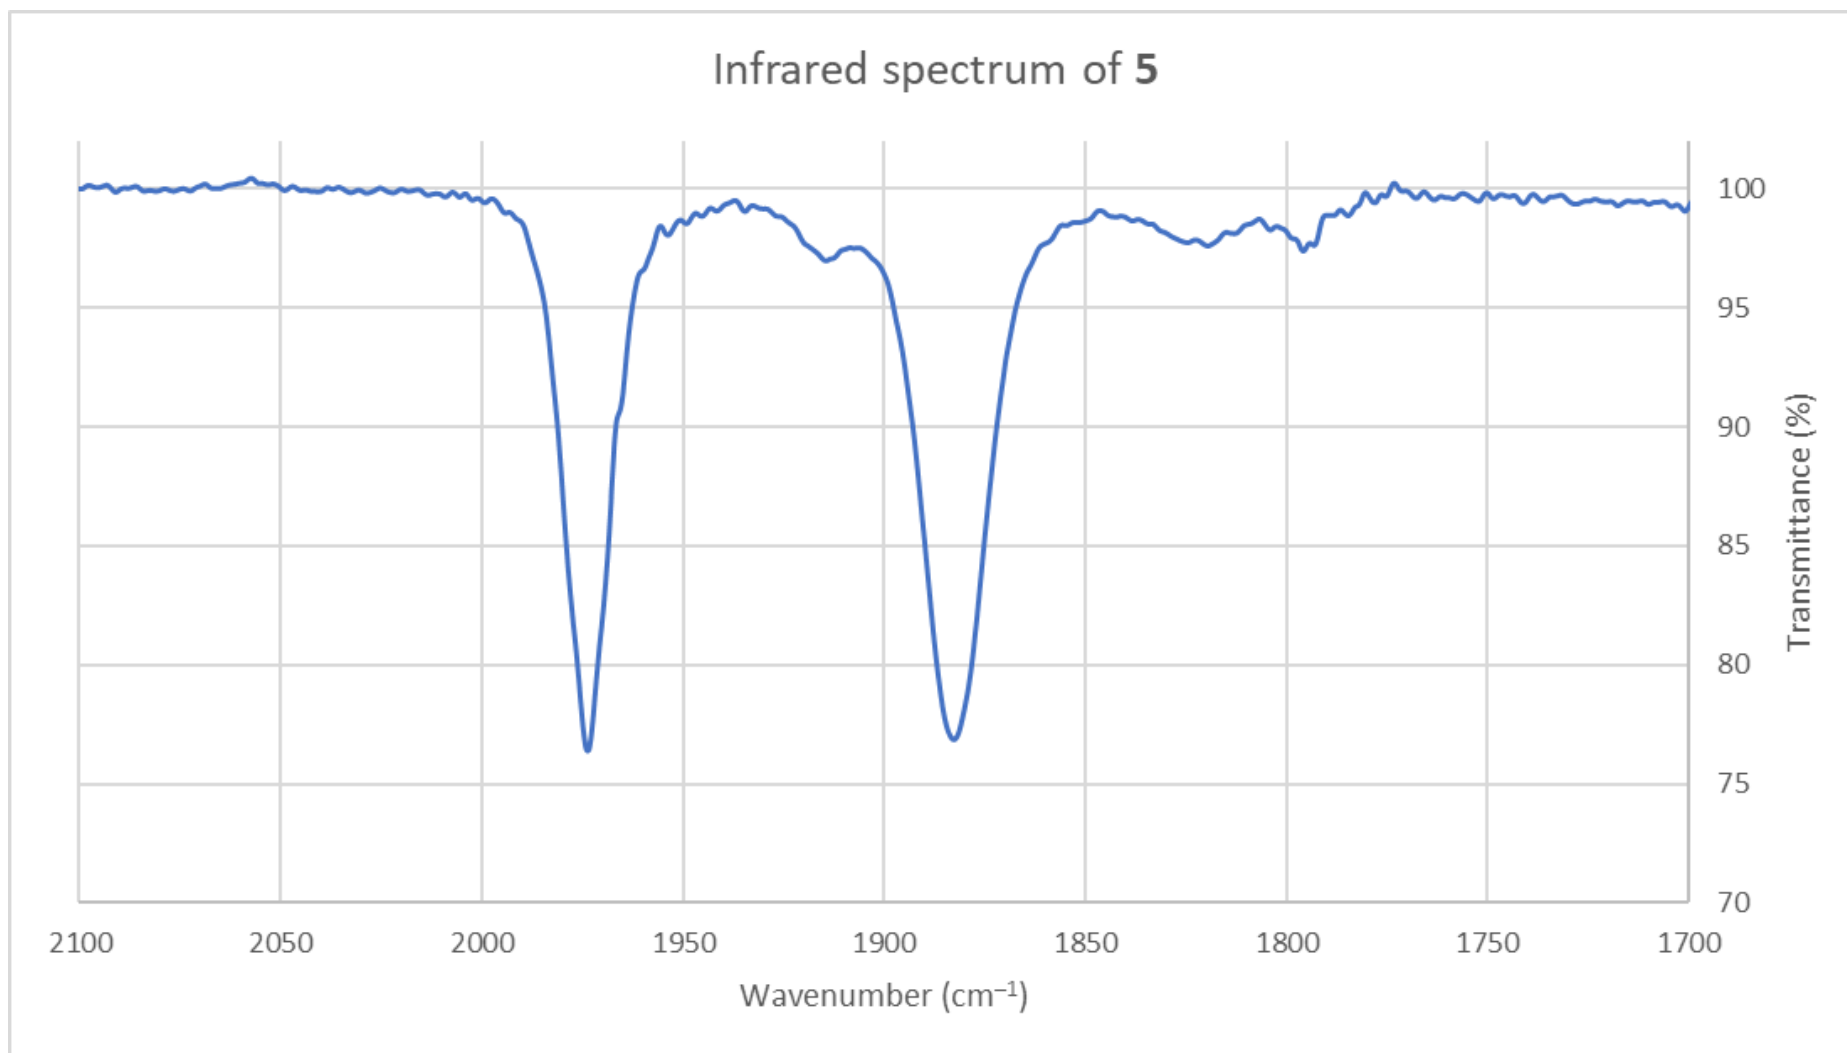

**Figure S38.** Infrared spectrum (CH<sub>2</sub>Cl<sub>2</sub>, cm<sup>-1</sup>) of **5**.

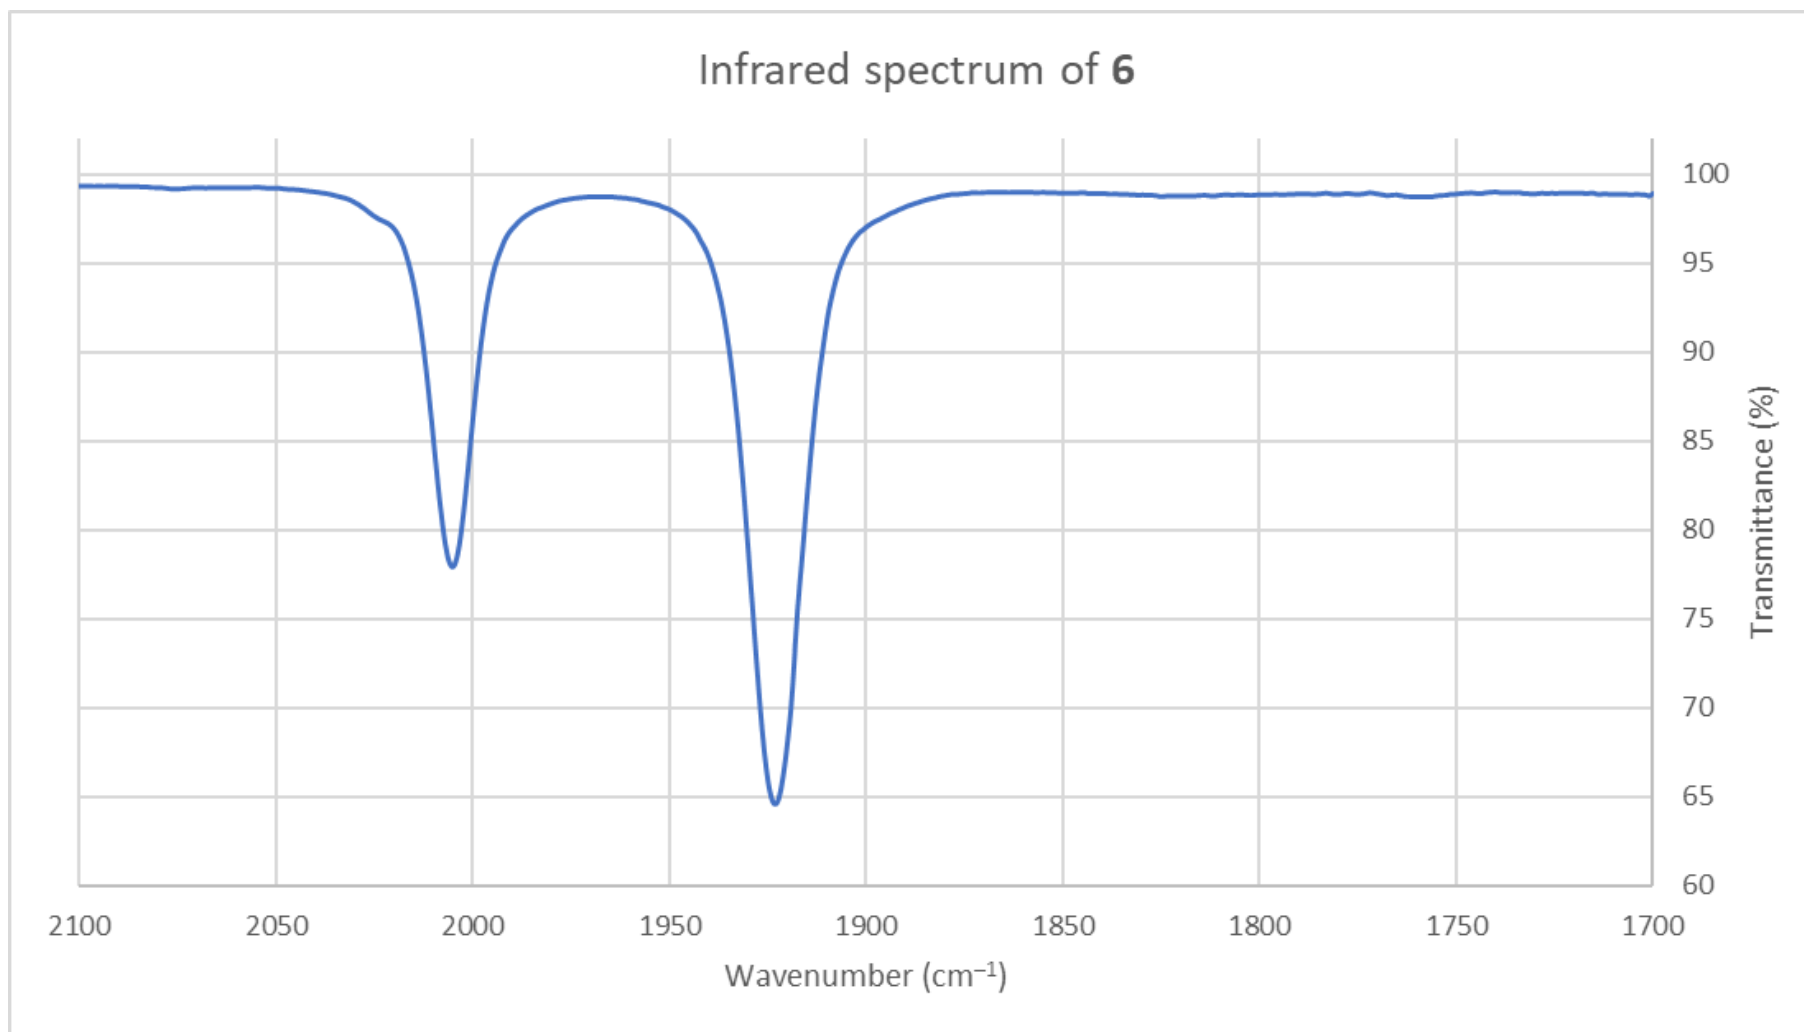

**Figure S40.** Infrared spectrum (CH<sub>2</sub>Cl<sub>2</sub>, cm<sup>-1</sup>) of **6**.



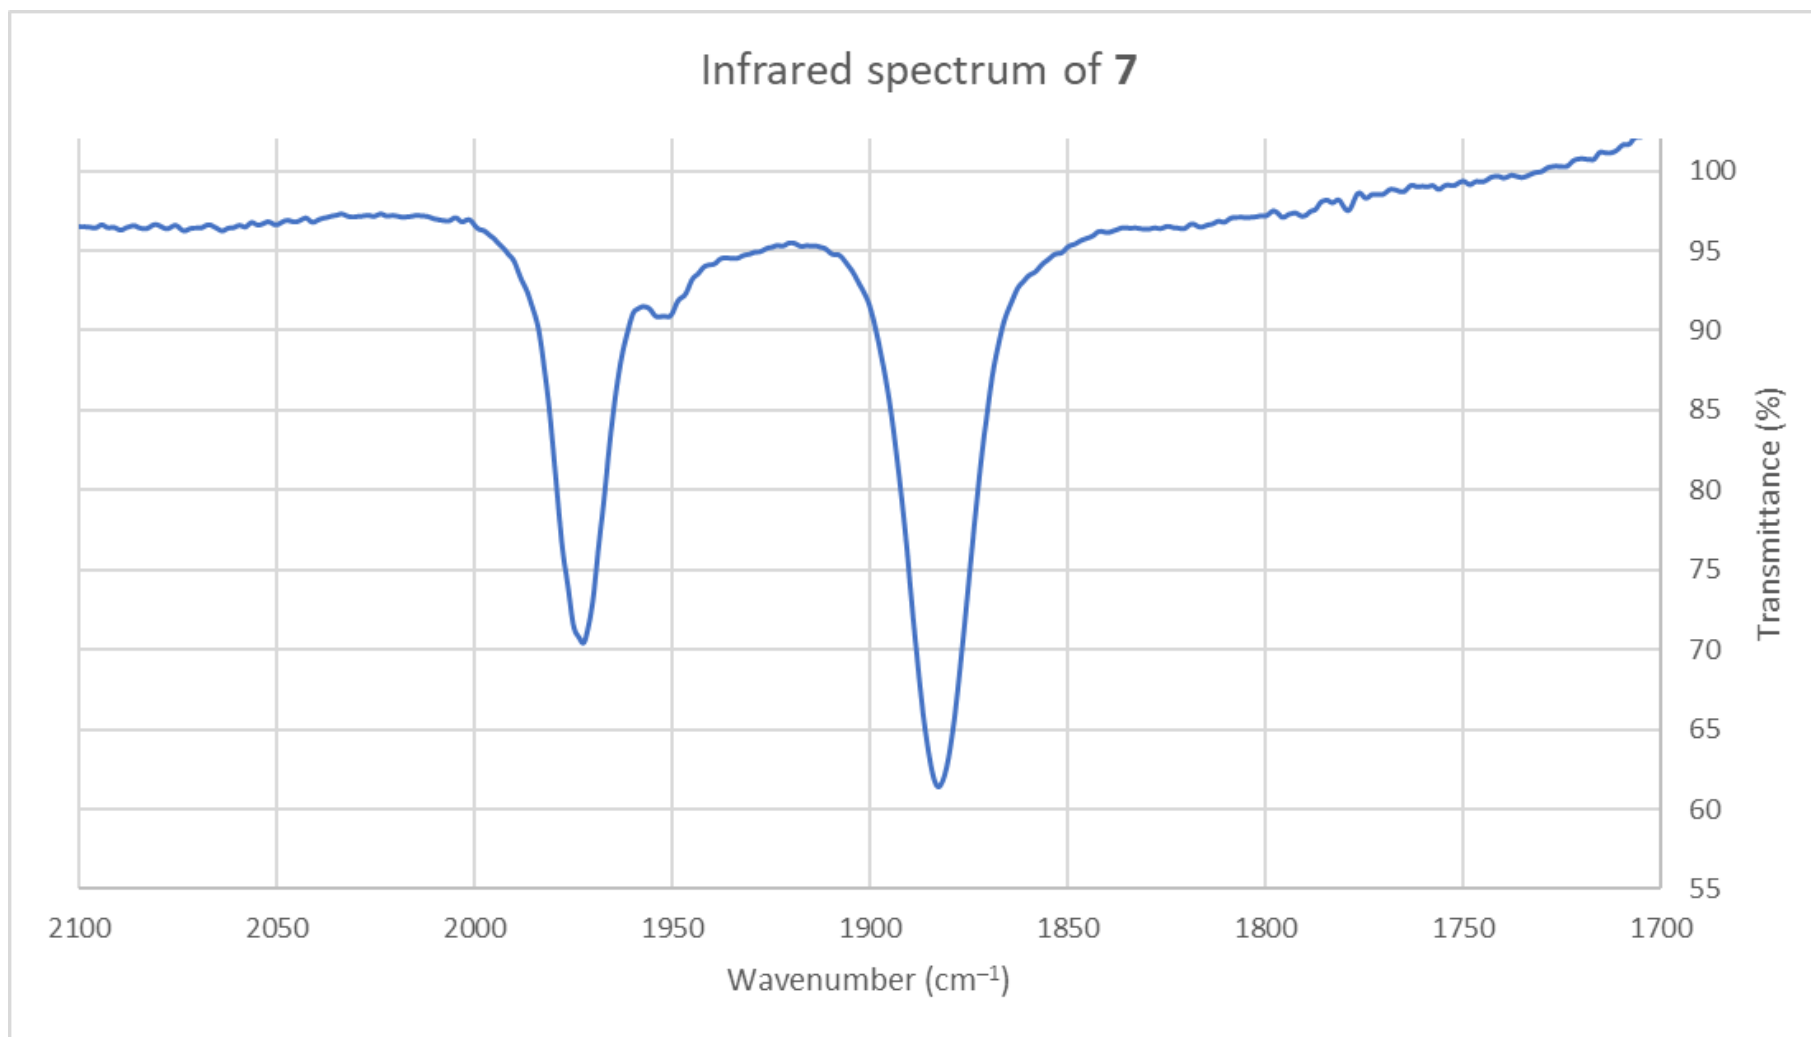

**Figure S41.** Infrared spectrum (CH<sub>2</sub>Cl<sub>2</sub>, cm<sup>-1</sup>) of **7**.

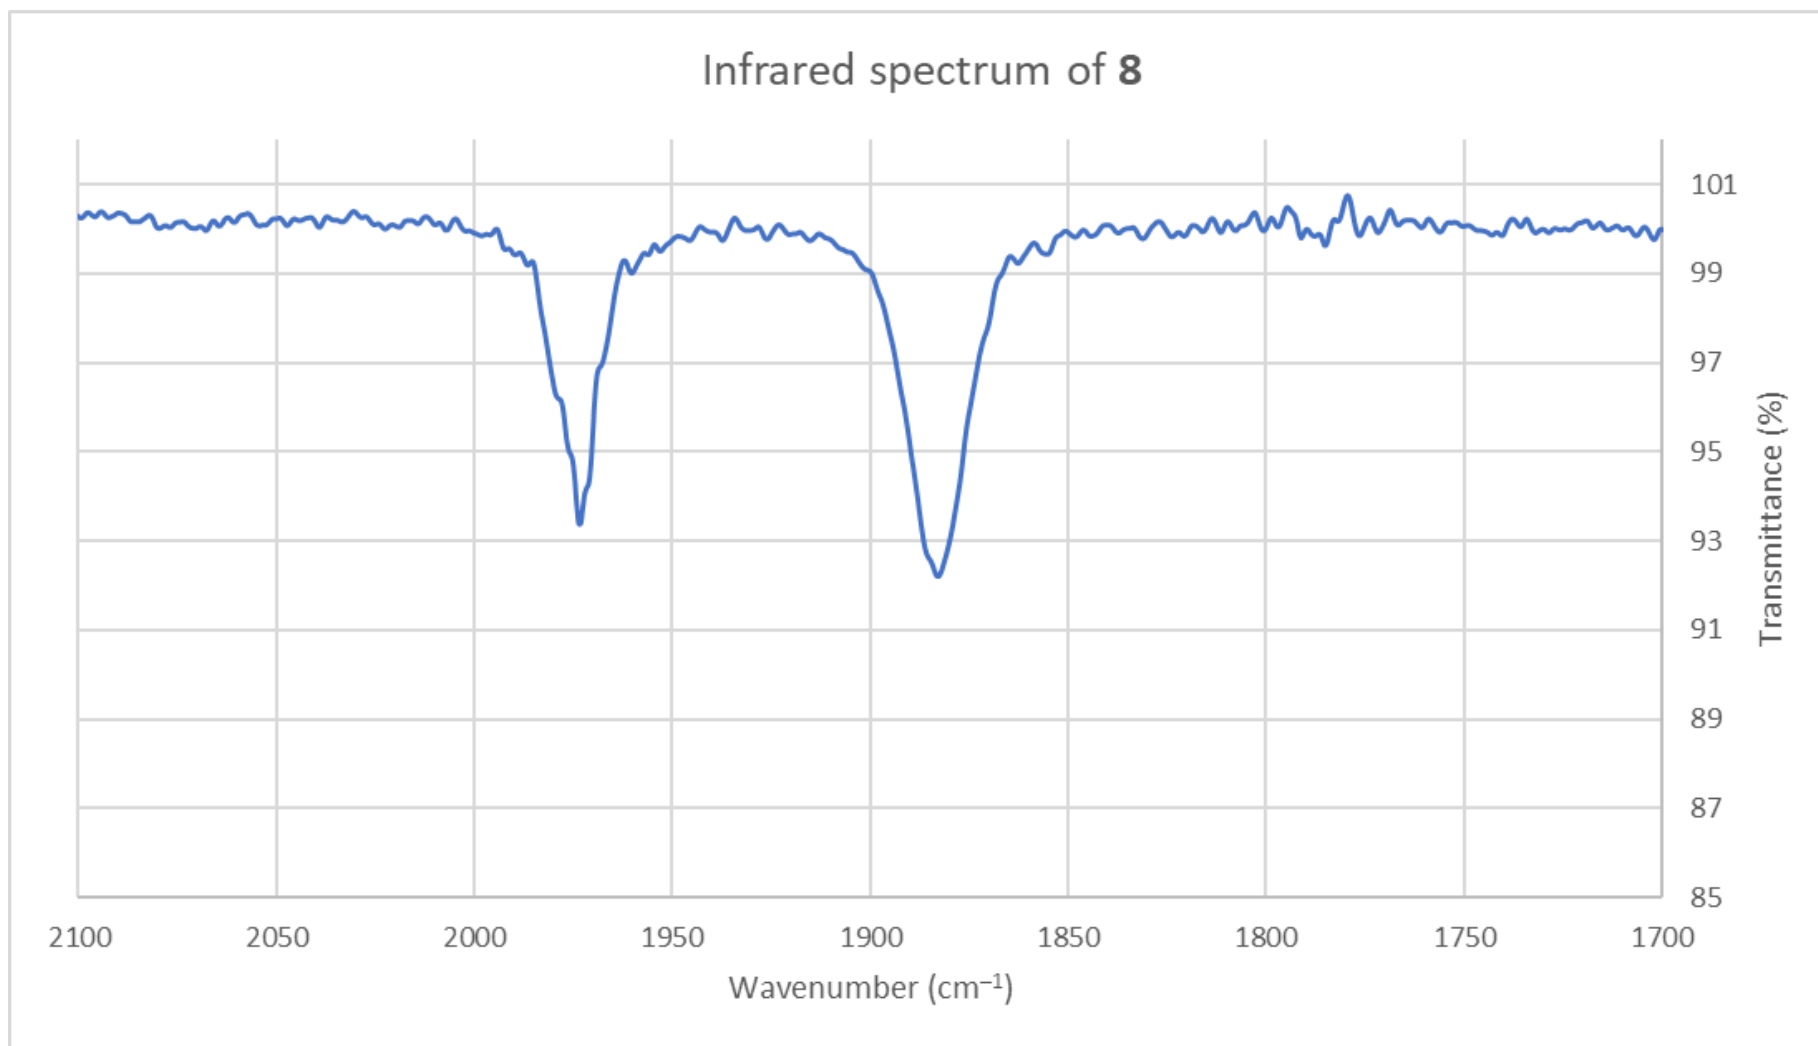

**Figure S42.** Infrared spectrum (CH<sub>2</sub>Cl<sub>2</sub>, cm<sup>-1</sup>) of **8**.

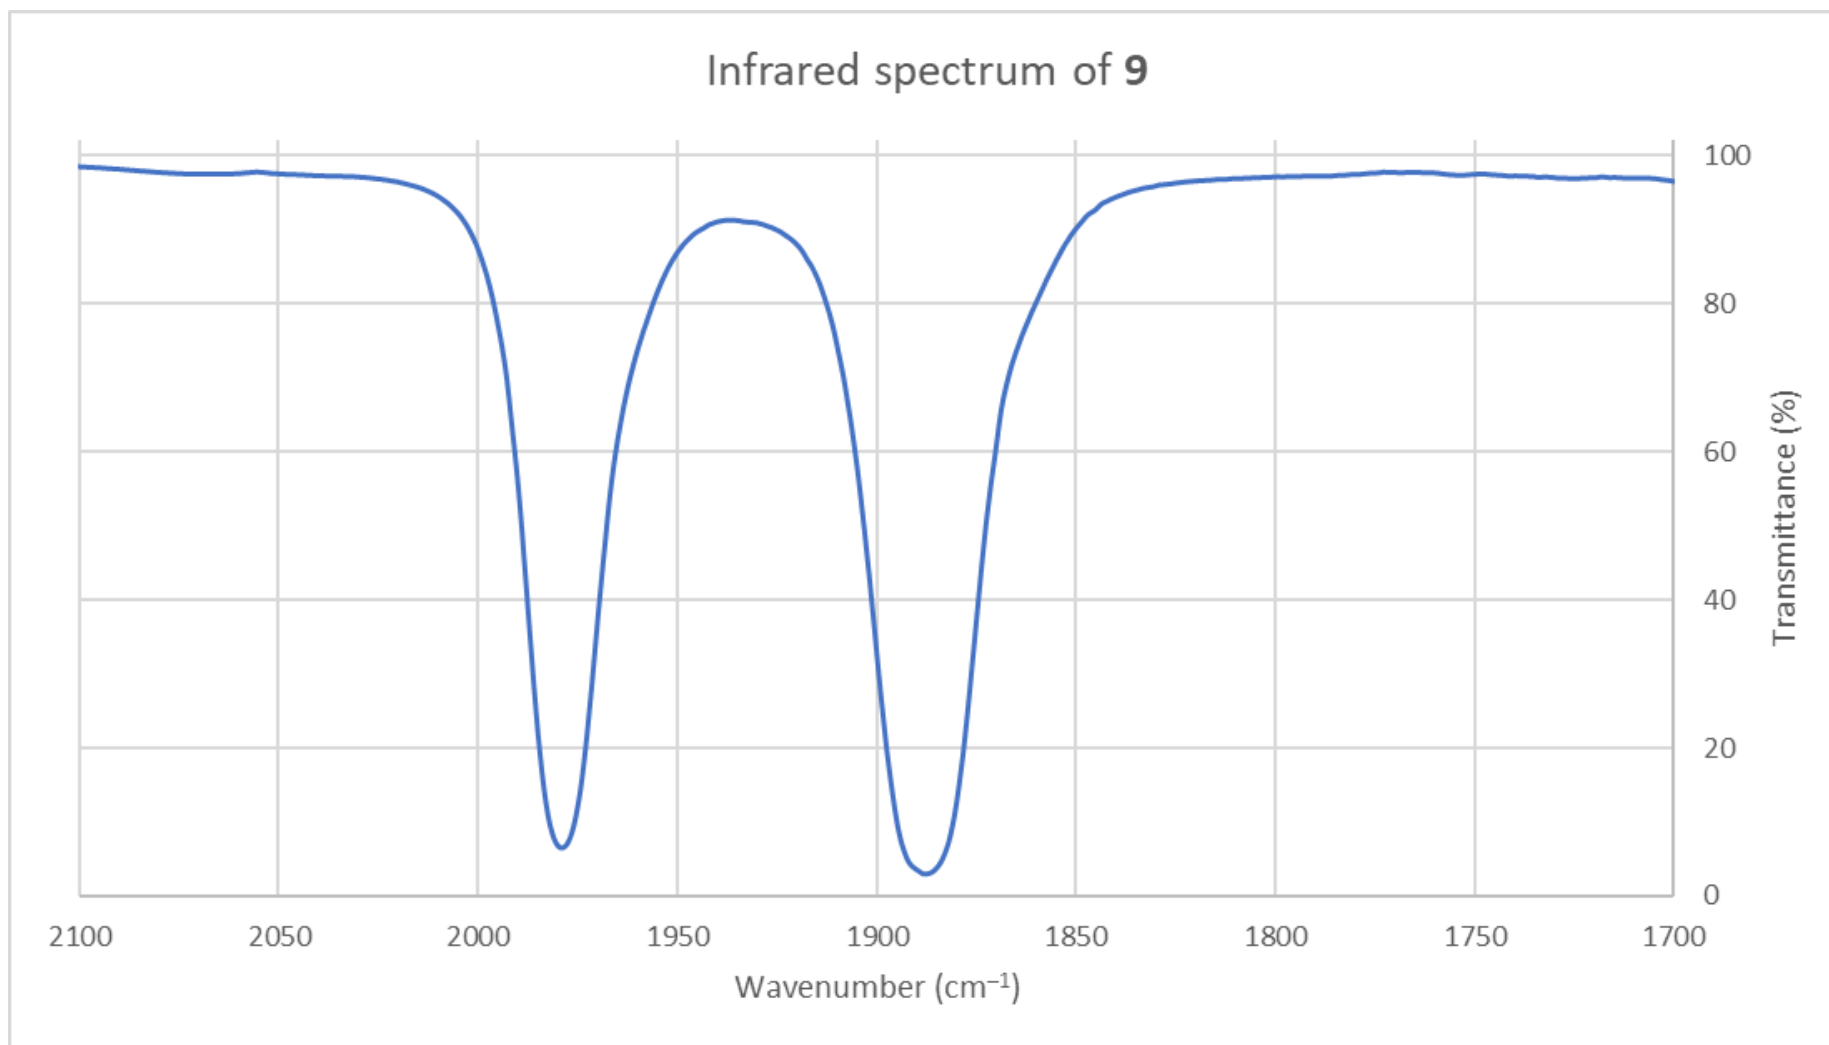

**Figure S43.** Infrared spectrum (CH<sub>2</sub>Cl<sub>2</sub>, cm<sup>-1</sup>) of [NC<sub>5</sub>H<sub>4</sub>{C≡W(CO)<sub>2</sub>(Tp\*)}-3] (**9**).

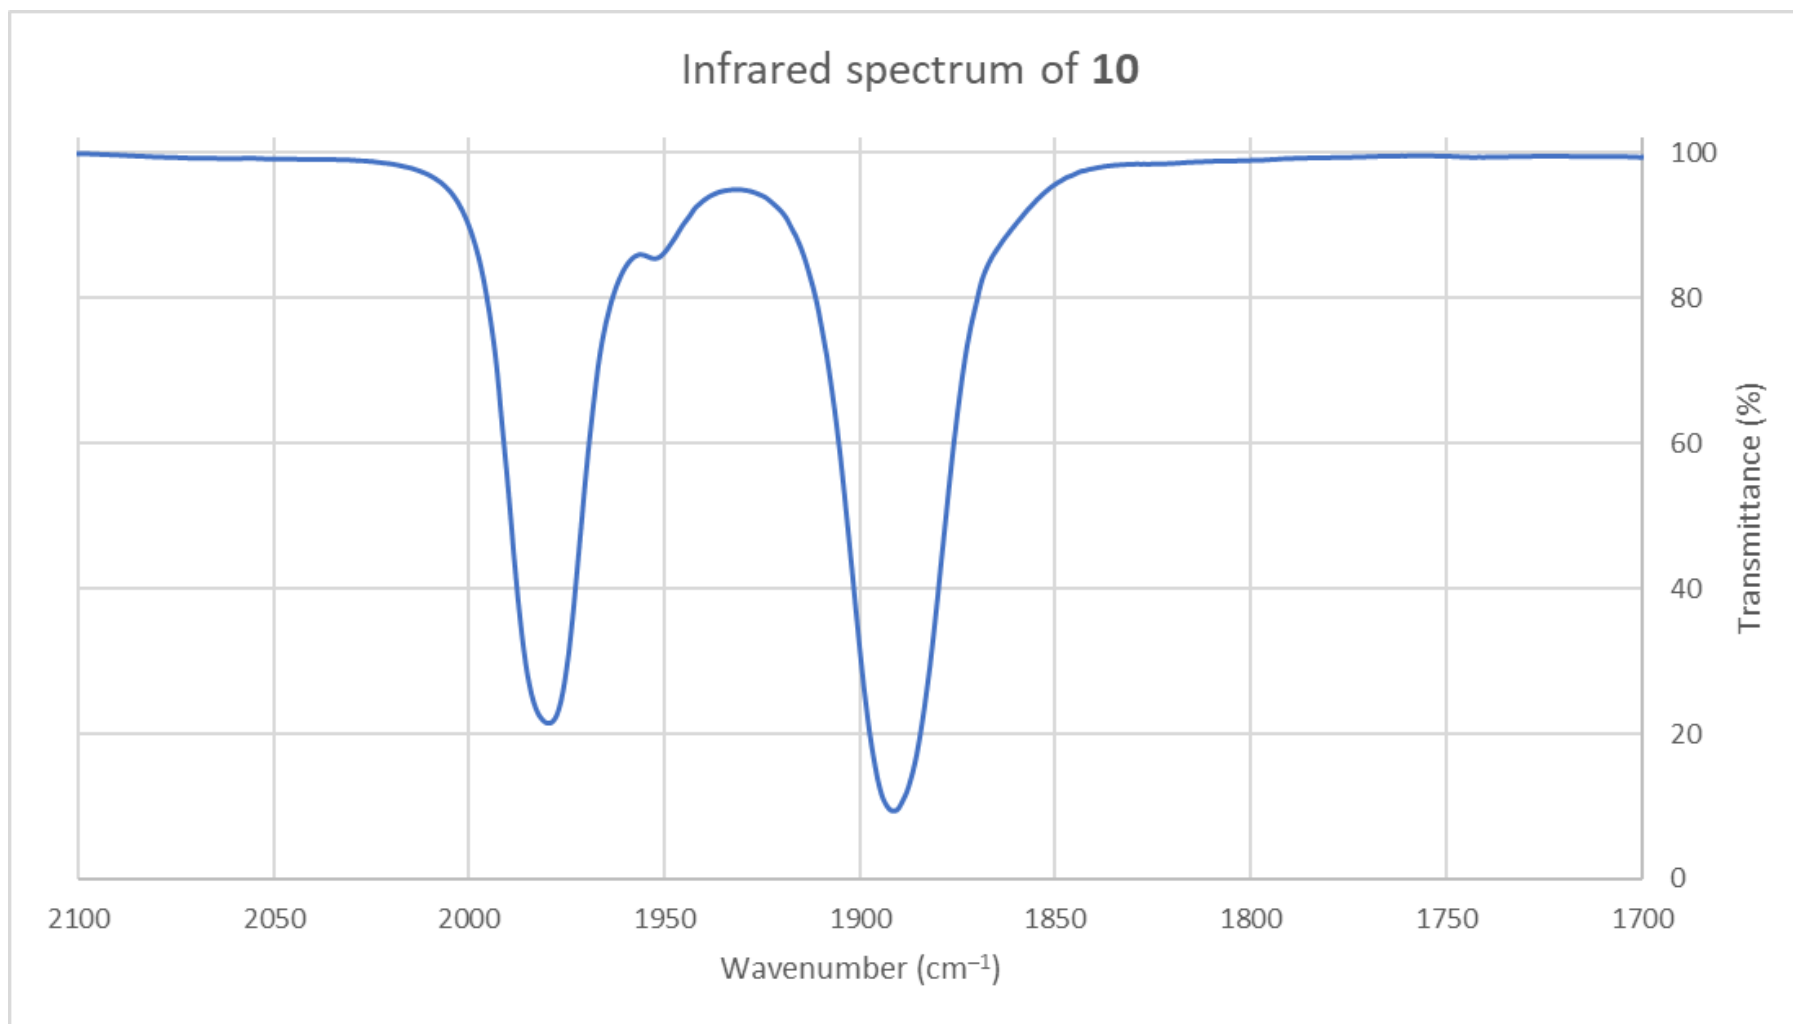

**Figure S44.** Infrared spectrum ( $\text{CH}_2\text{Cl}_2$ ,  $\text{cm}^{-1}$ ) of  $[\text{NC}_5\text{H}_3\{\text{C}\equiv\text{W}(\text{CO})_2(\text{Tp}^*)\}_2\text{-3,5}]$  (**10**).

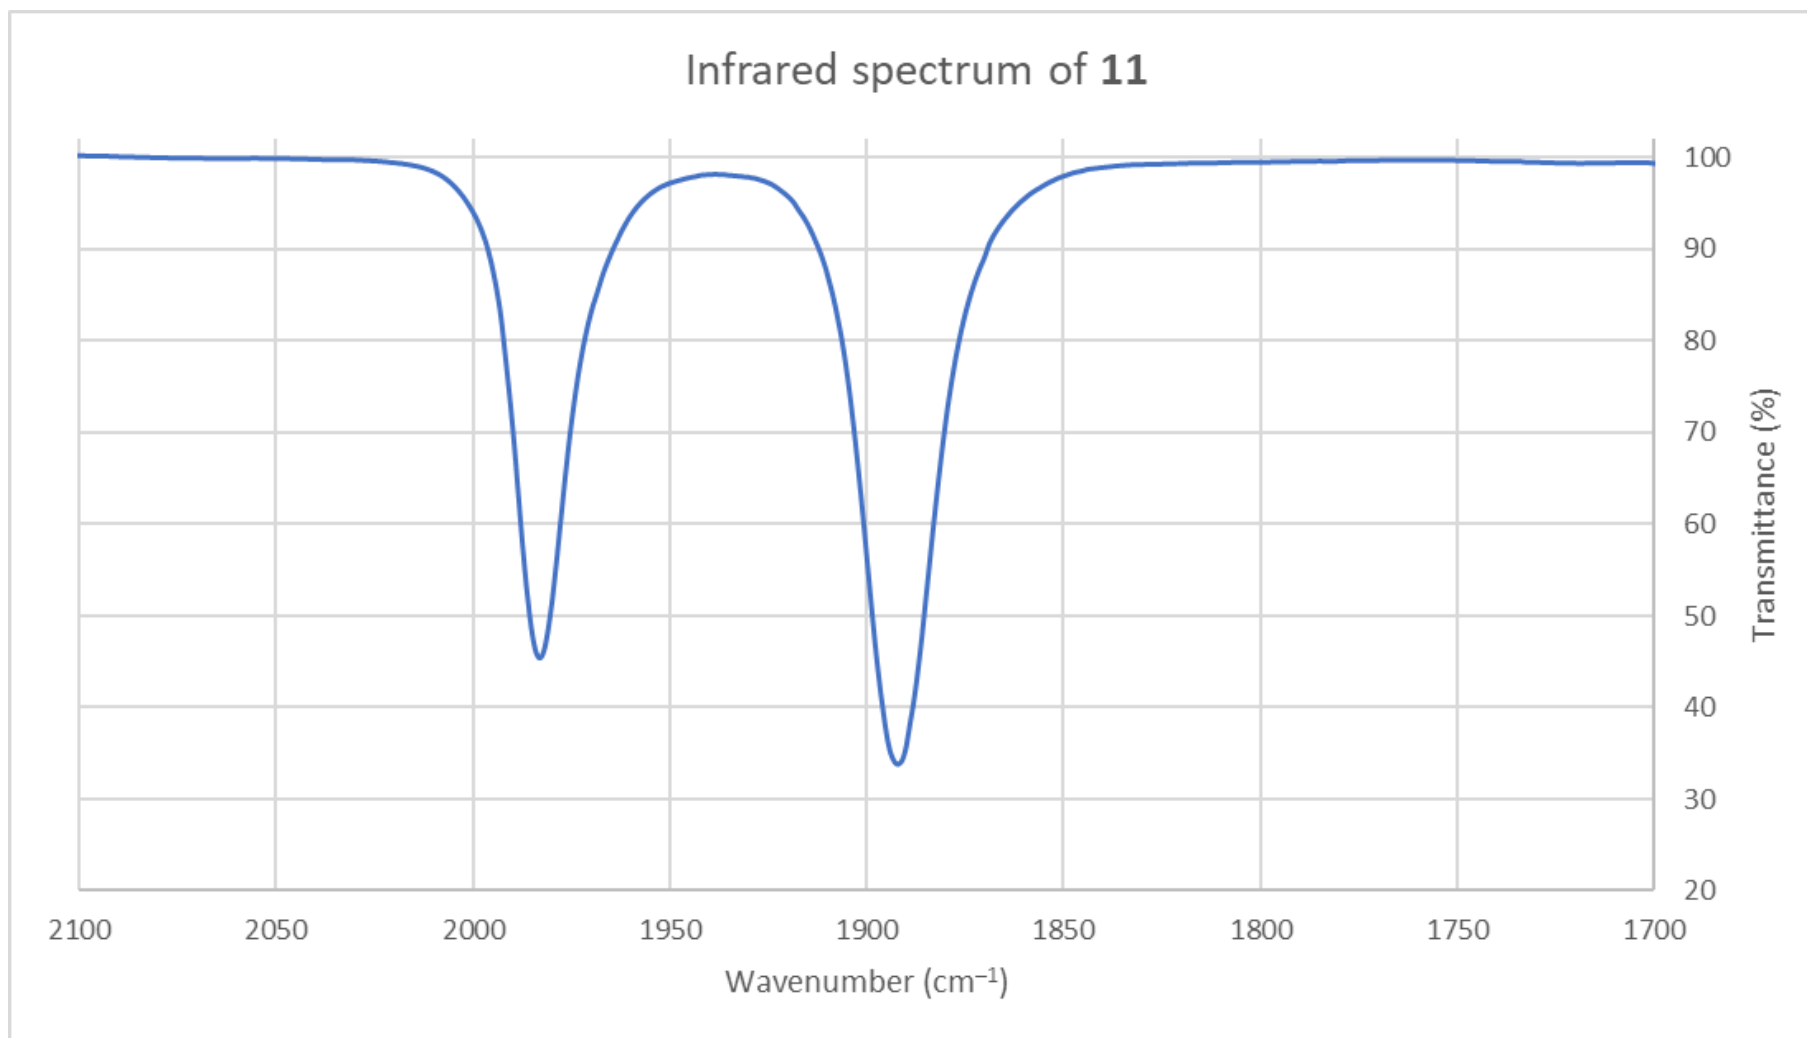

**Figure S45.** Infrared spectrum (CH<sub>2</sub>Cl<sub>2</sub>, cm<sup>-1</sup>) of [NC<sub>5</sub>H<sub>4</sub>{C≡W(CO)<sub>2</sub>(Tp\*)}-4] (**11**).

## Selected electronic spectra

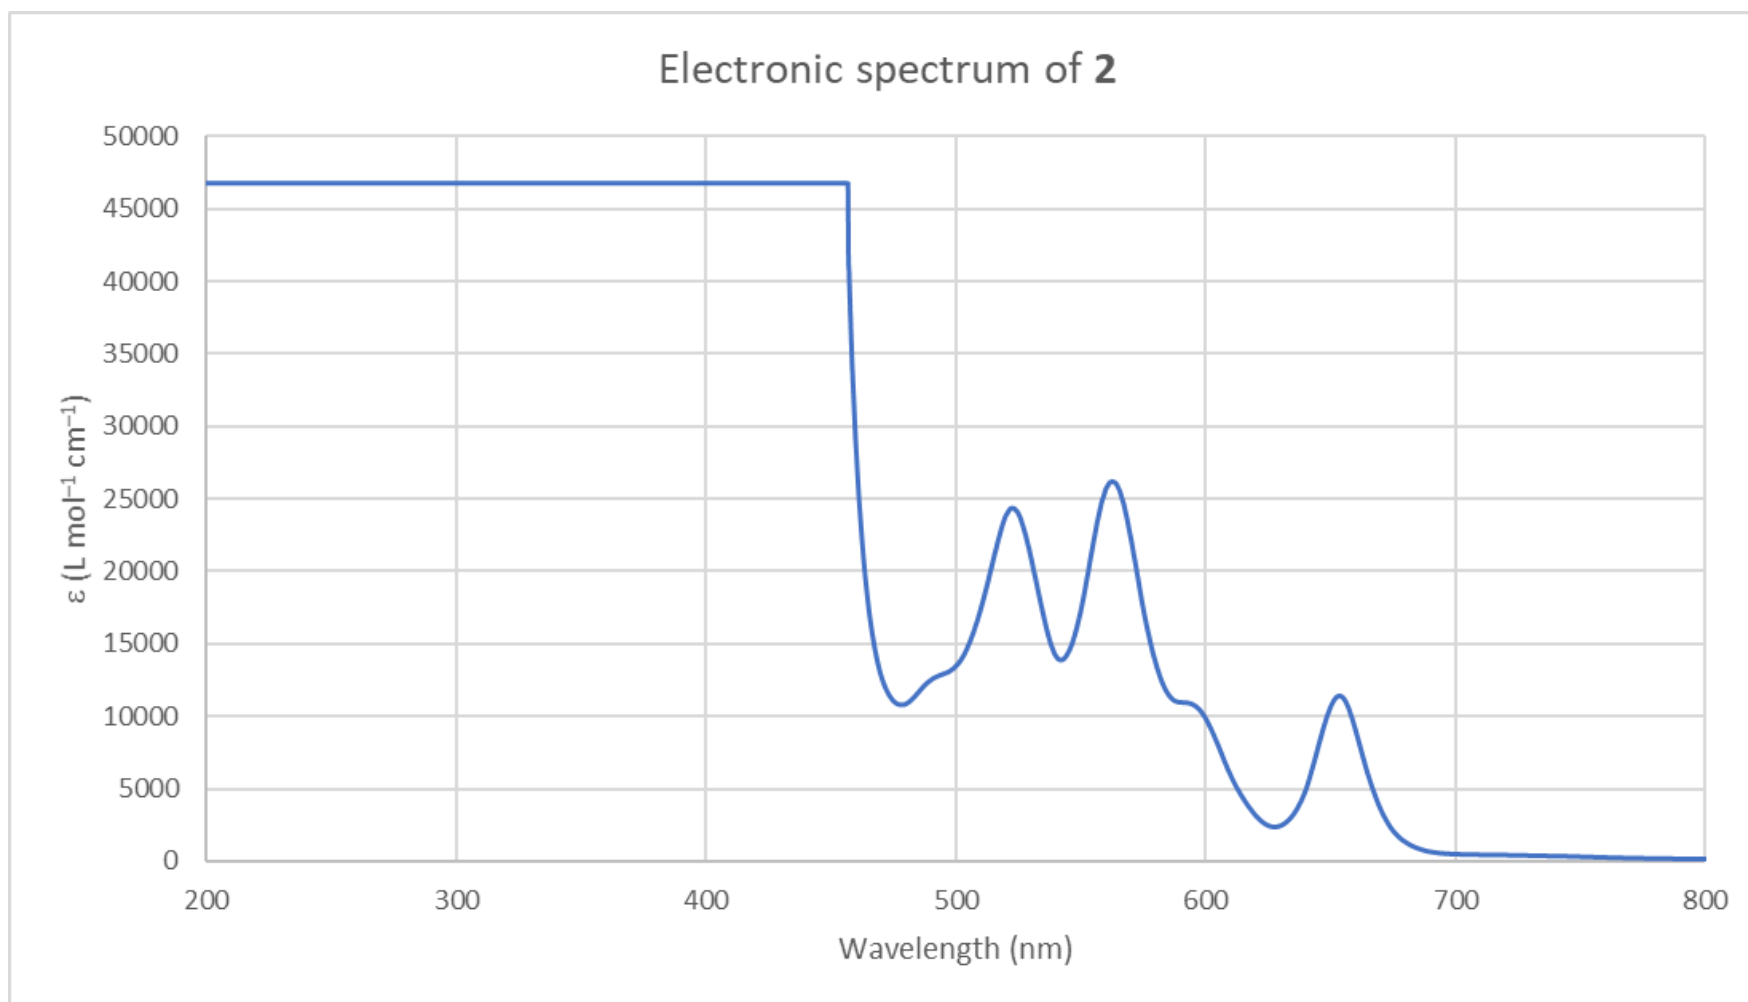

**Figure S46.** Electronic spectrum ( $\text{CH}_2\text{Cl}_2$ ) of **2** ( $1.1 \times 10^{-4} \text{ M}$ ).

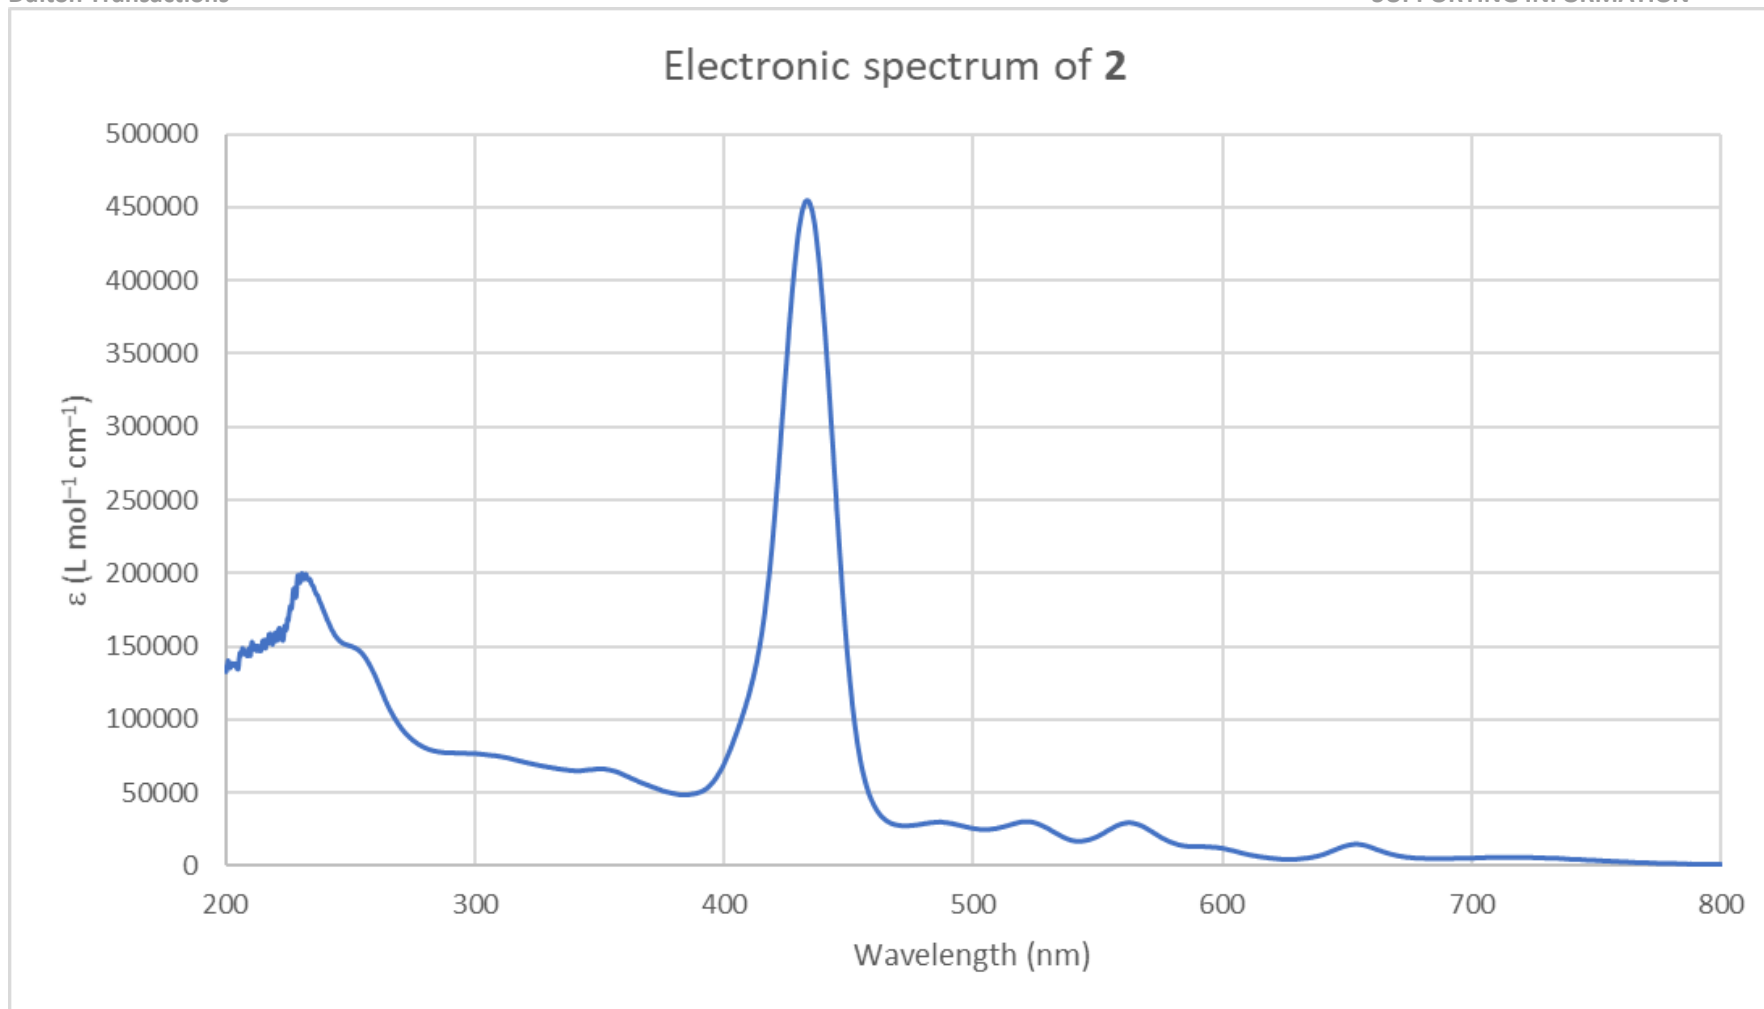

**Figure S47.** Electronic spectrum ( $\text{CH}_2\text{Cl}_2$ ) of **2** ( $5.3 \times 10^{-6} \text{ M}$ ).

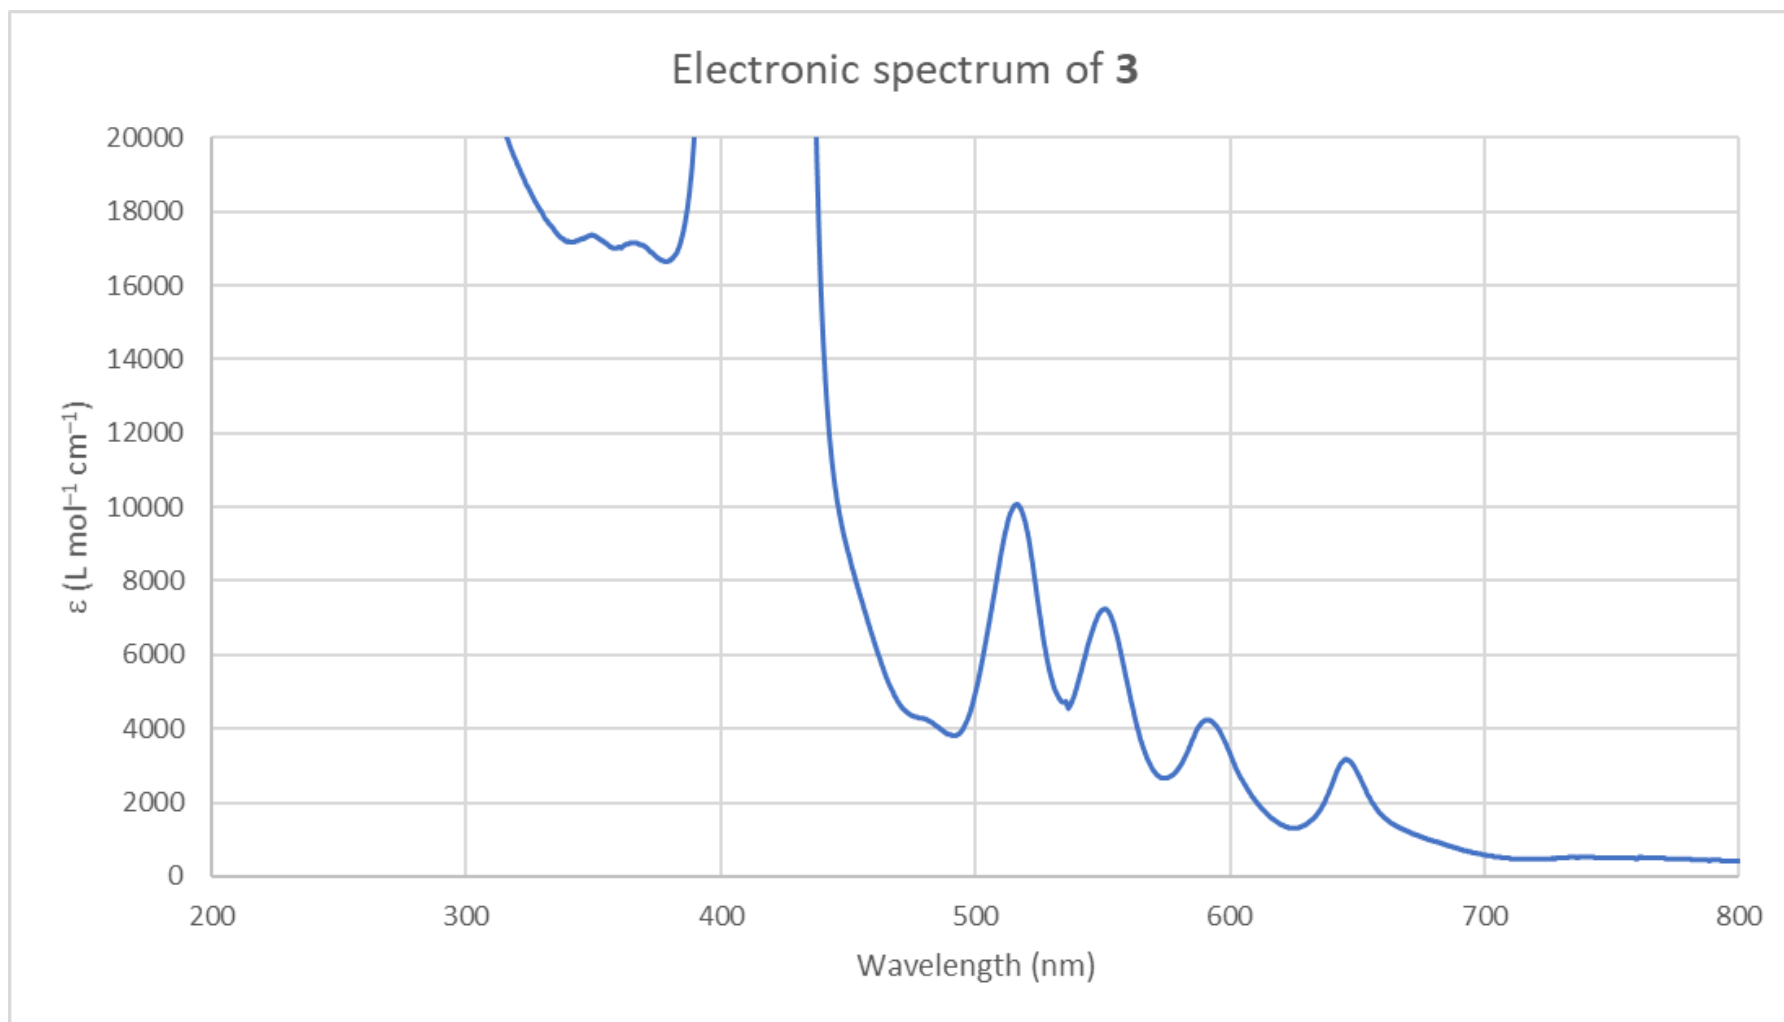

**Figure S48.** Electronic spectrum ( $\text{CH}_2\text{Cl}_2$ ) of **3** ( $3.6 \times 10^{-5} \text{ M}$ ).



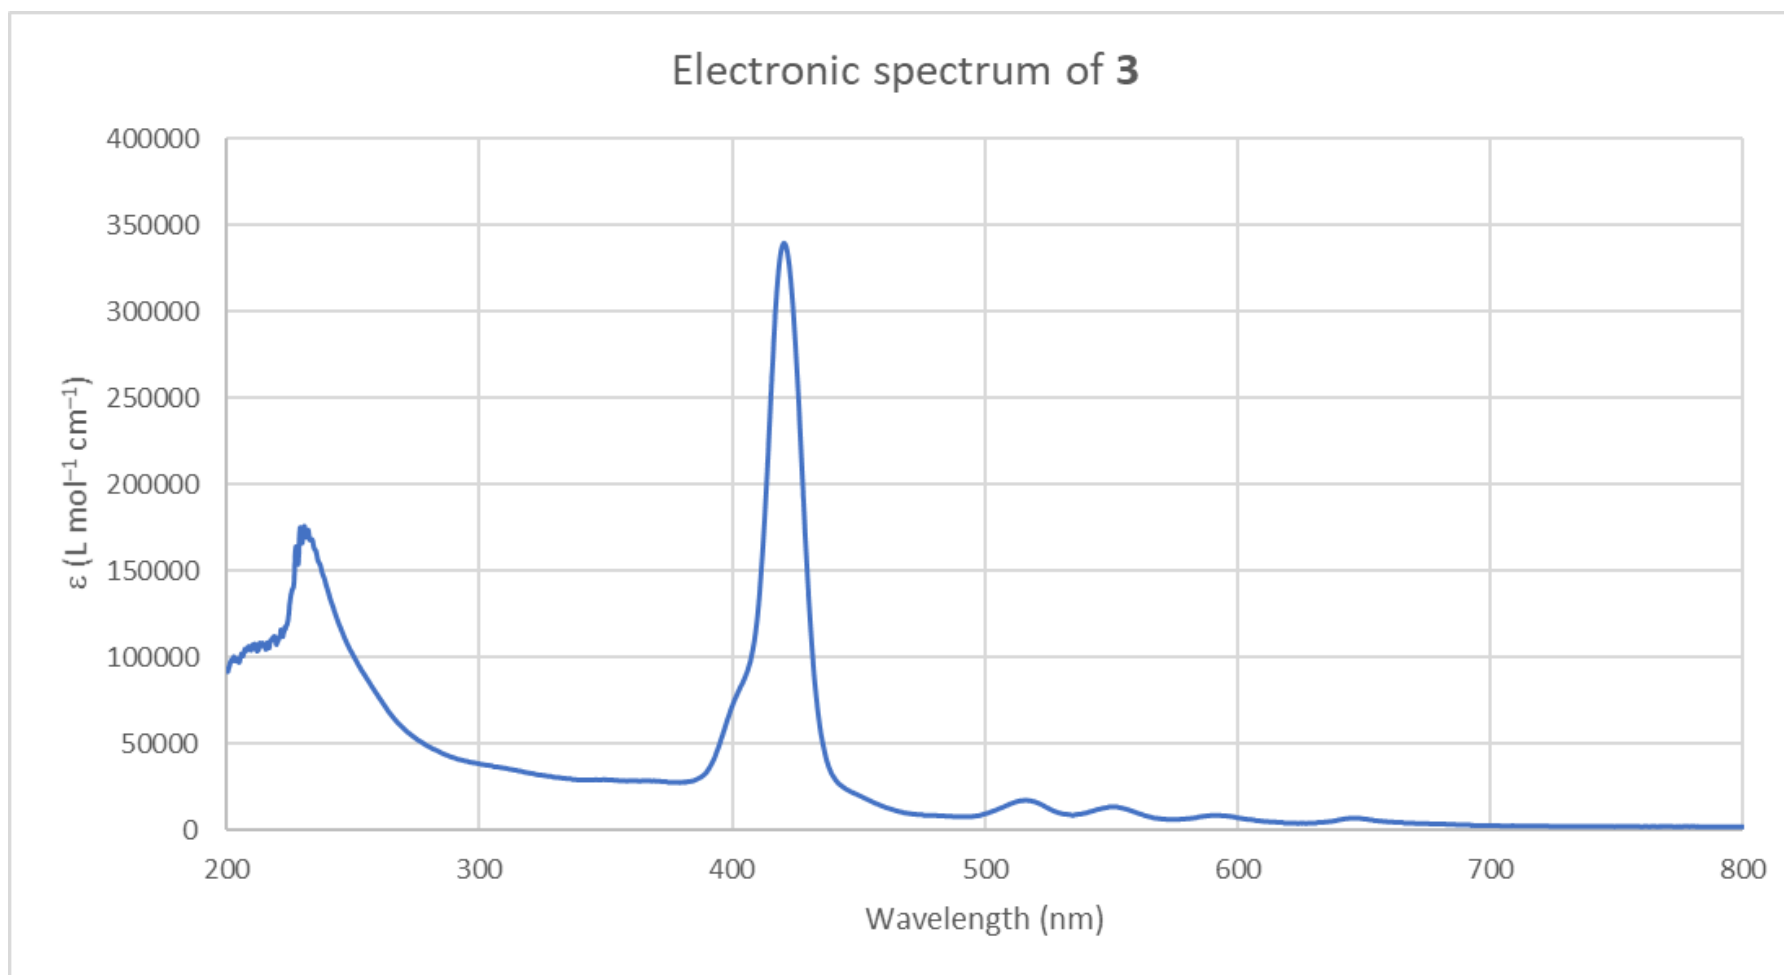

**Figure S49.** Electronic spectrum ( $\text{CH}_2\text{Cl}_2$ ) of **3** ( $3.6 \times 10^{-6}$  M).

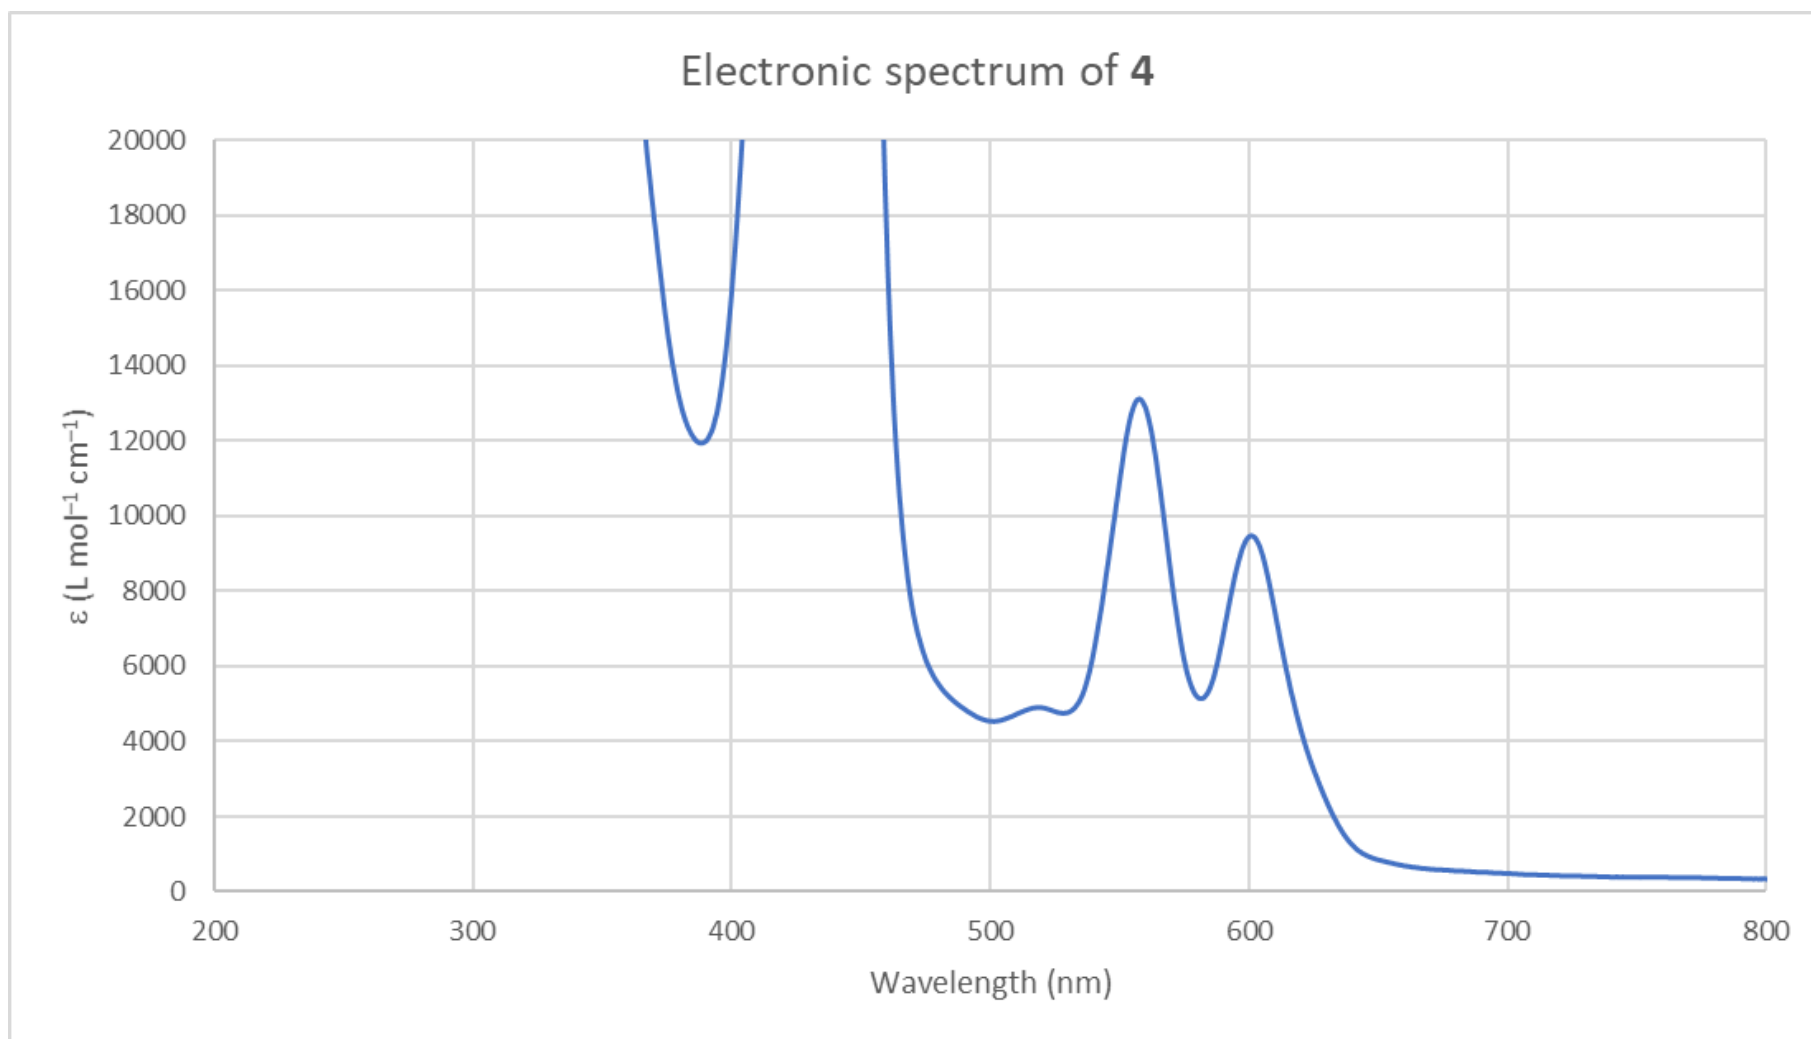

**Figure S50.** Electronic spectrum ( $\text{CH}_2\text{Cl}_2$ ) of **4** ( $1.2 \times 10^{-4} \text{ M}$ ).

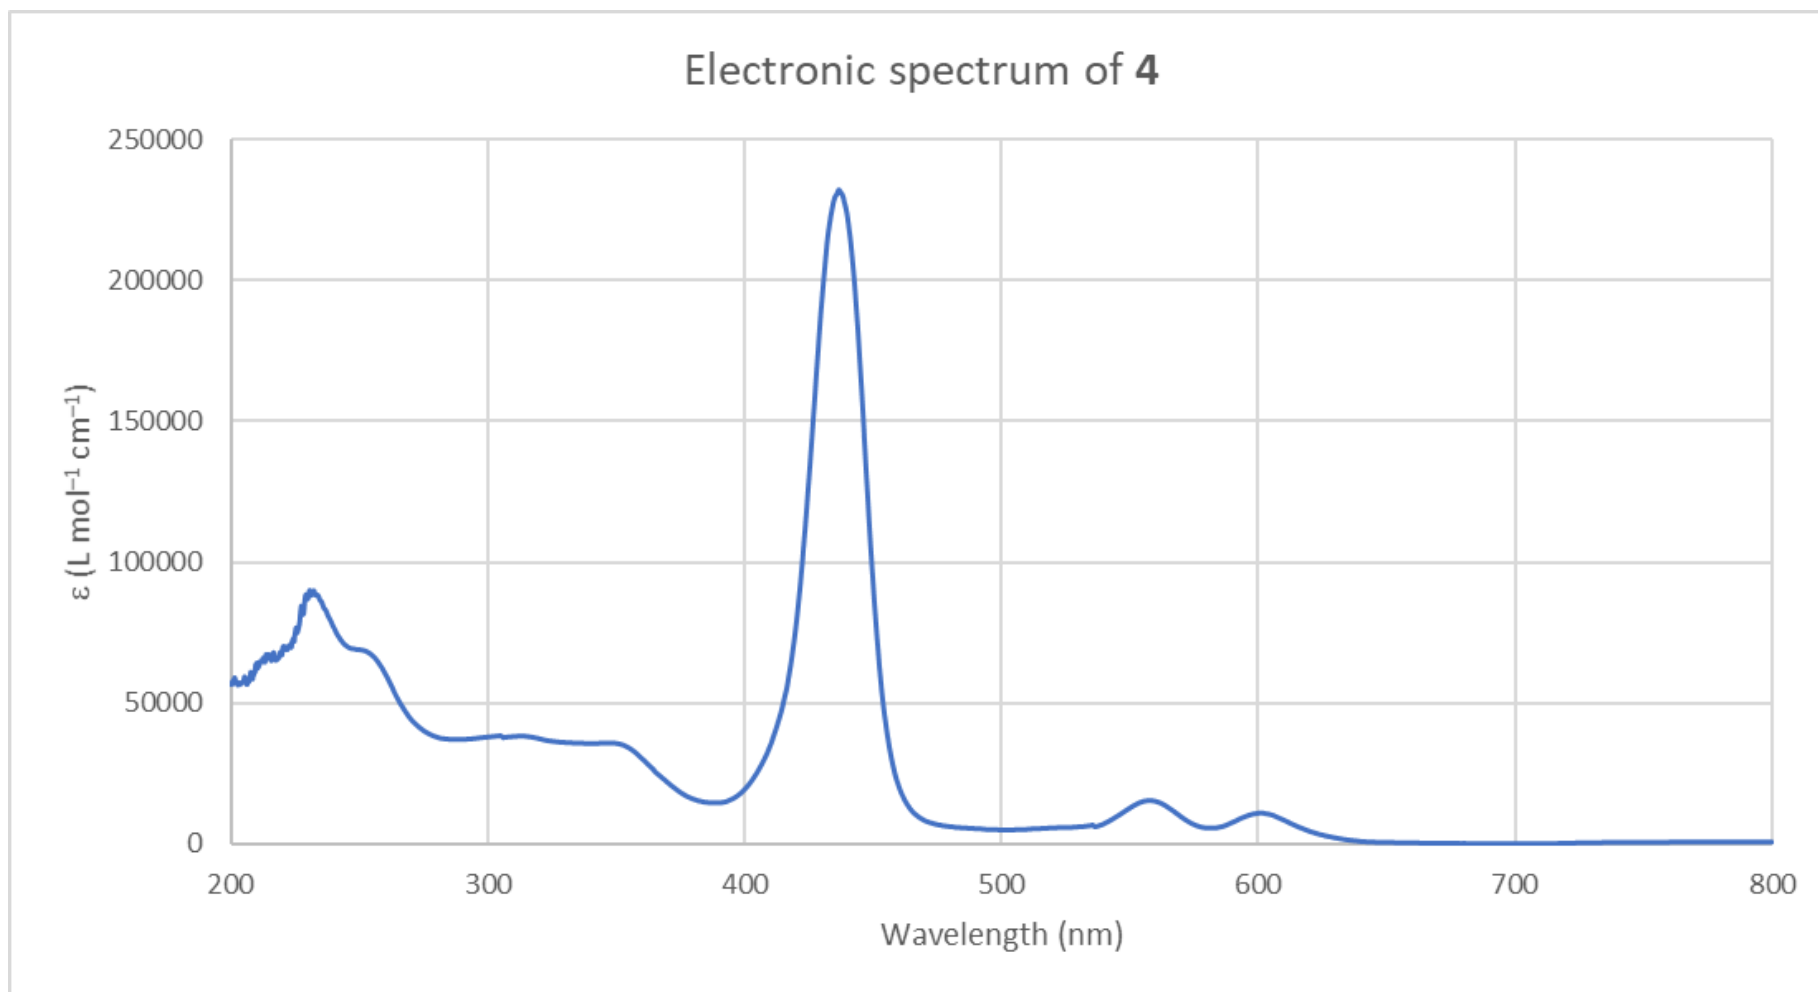

**Figure S51.** Electronic spectrum ( $\text{CH}_2\text{Cl}_2$ ) of **4** ( $1.2 \times 10^{-5} \text{ M}$ ).

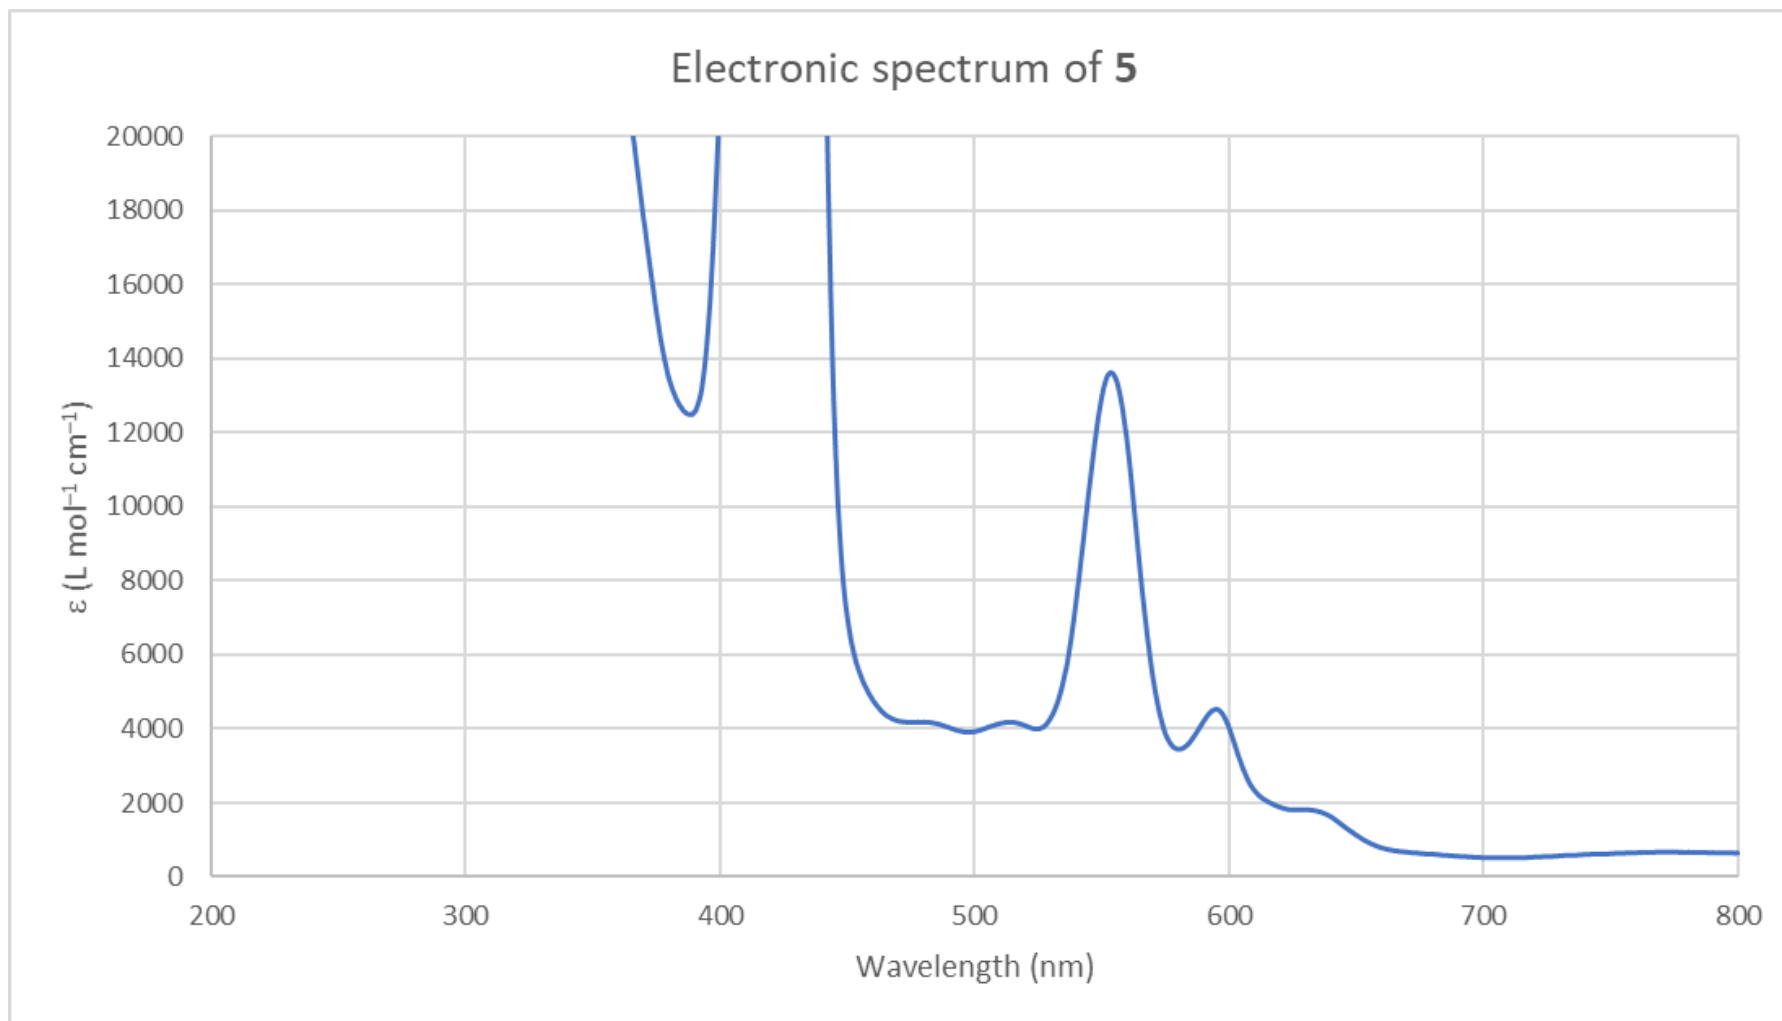

**Figure S52.** Electronic spectrum (CH<sub>2</sub>Cl<sub>2</sub>) of **5** ( $1.2 \times 10^{-4}$  M).

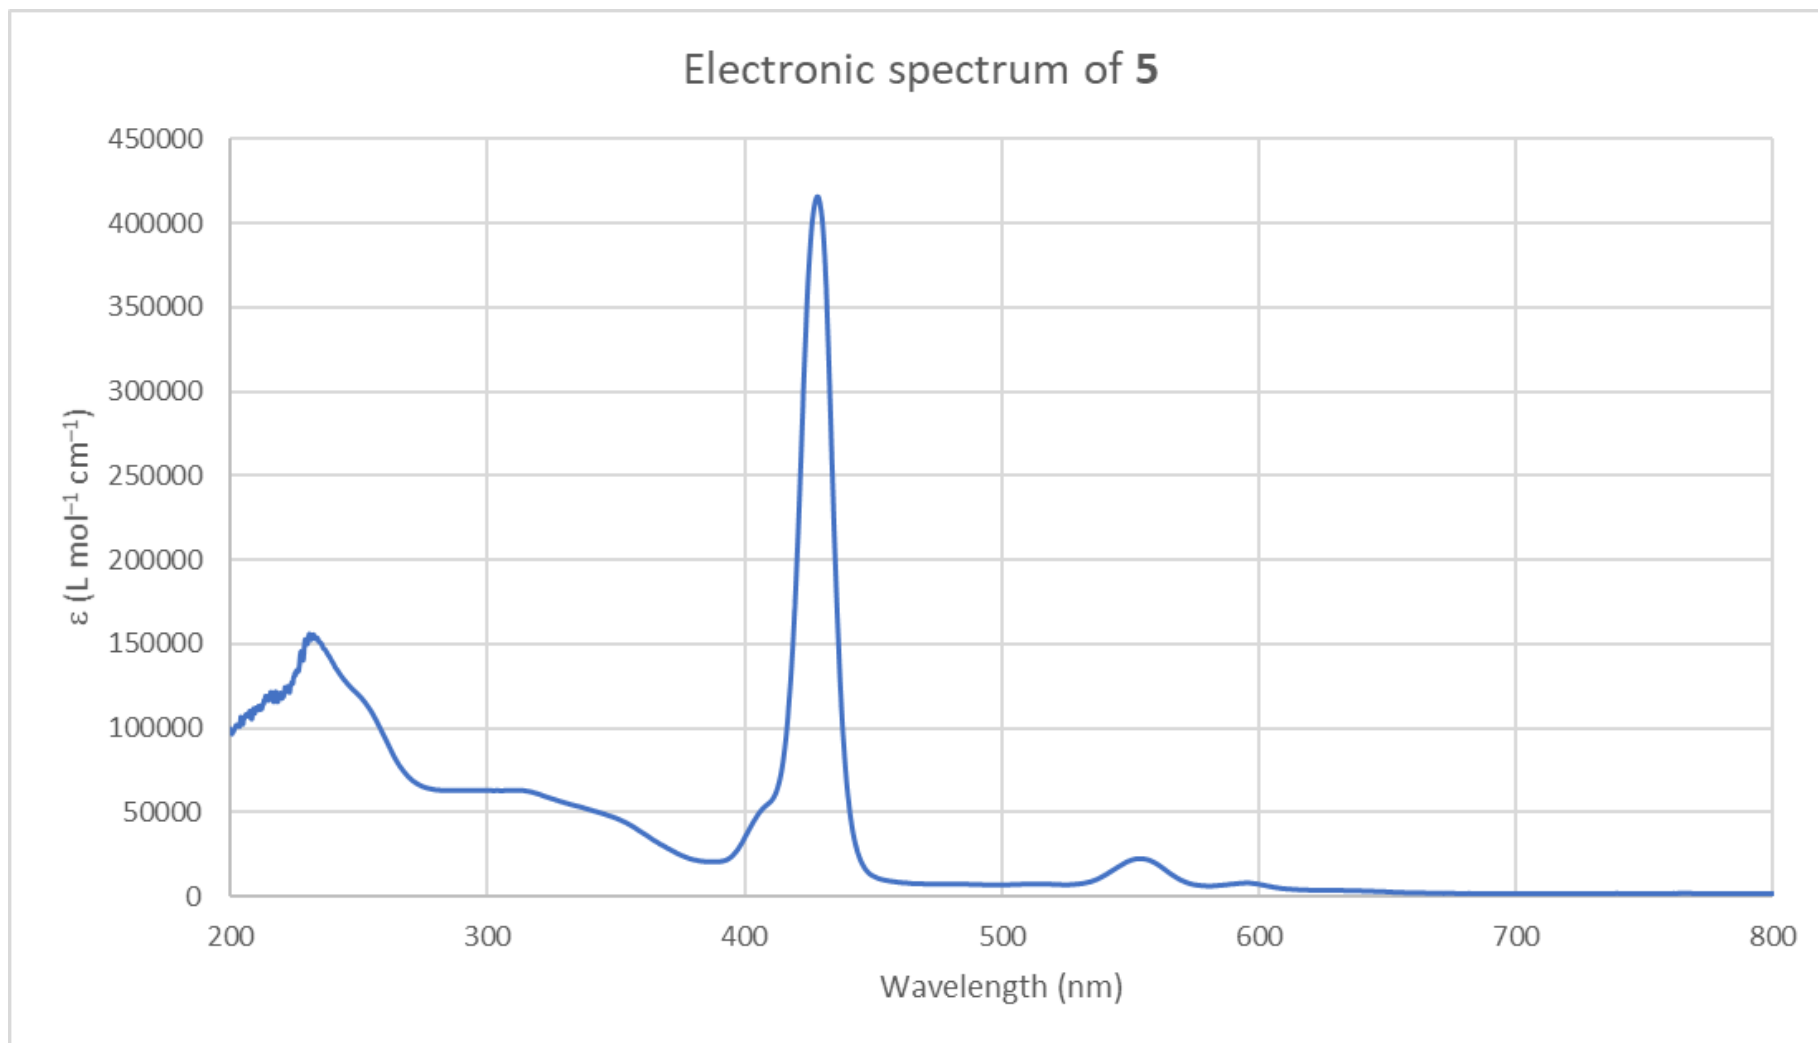

**Figure S53.** Electronic spectrum ( $\text{CH}_2\text{Cl}_2$ ) of **5** ( $6.8 \times 10^{-6} \text{ M}$ ).

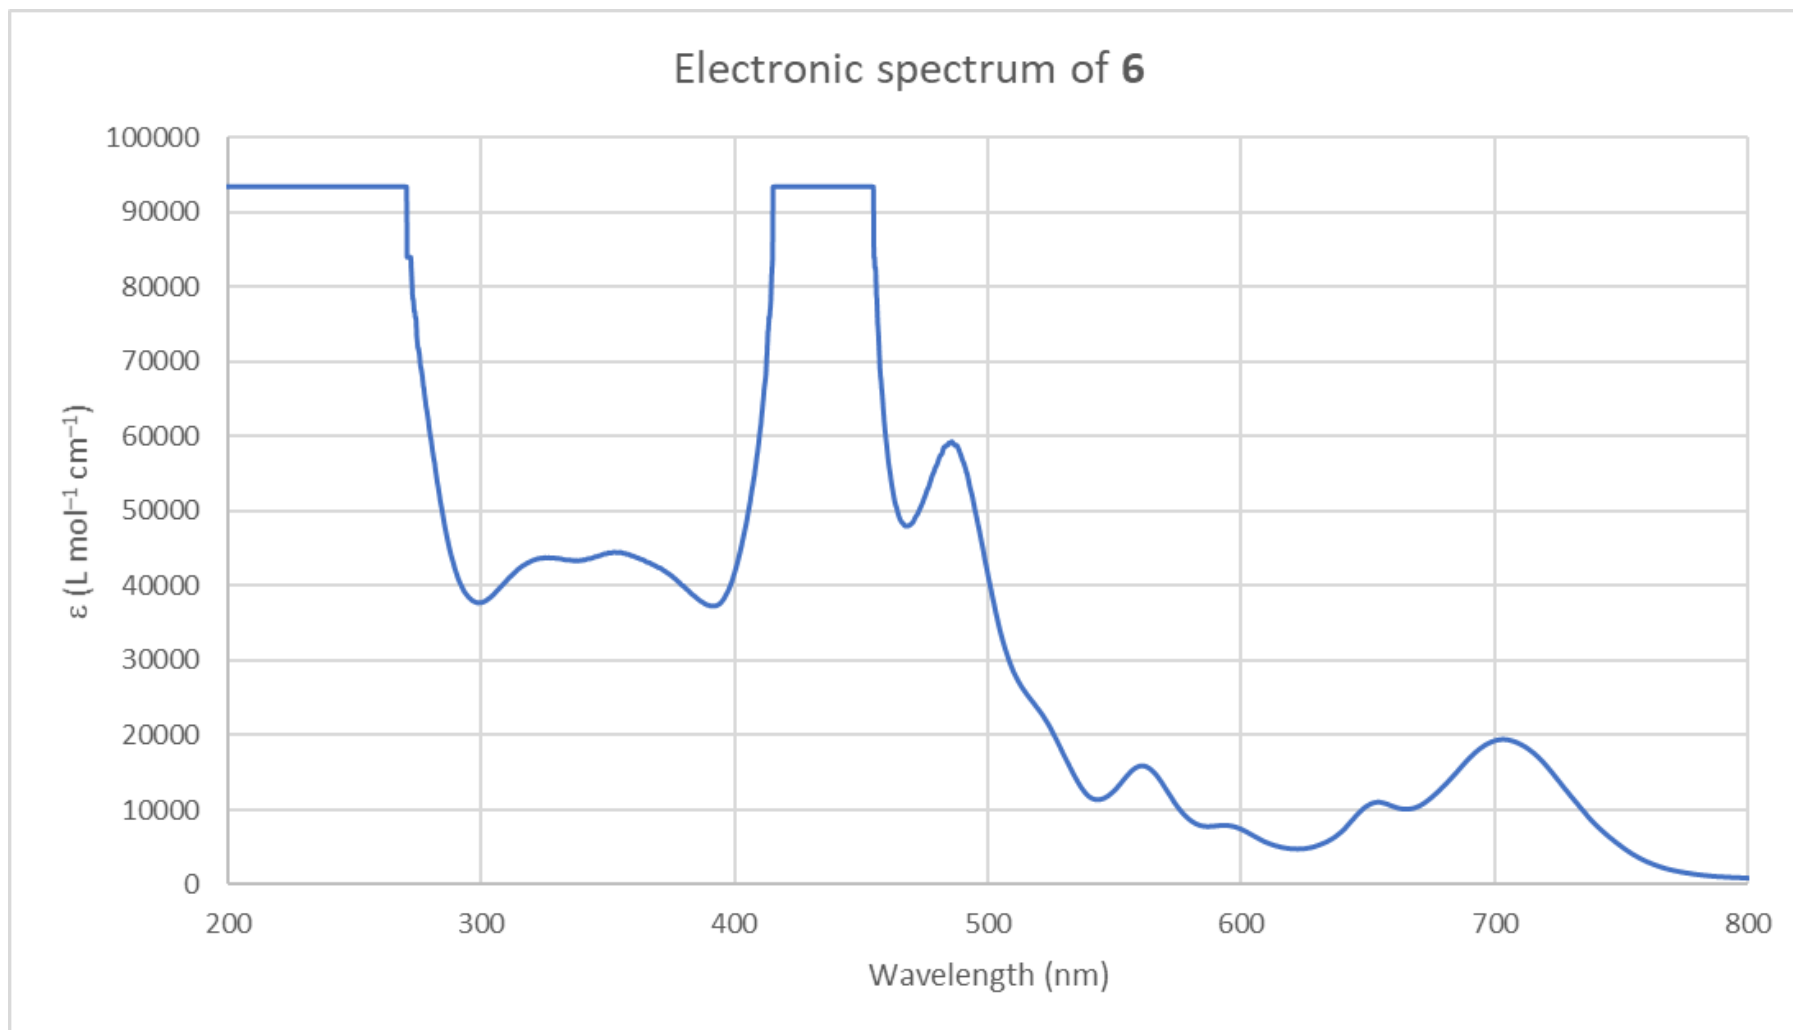

**Figure S54.** Electronic spectrum ( $\text{CH}_2\text{Cl}_2$ ) of **6** ( $5.4 \times 10^{-5} \text{ M}$ ).

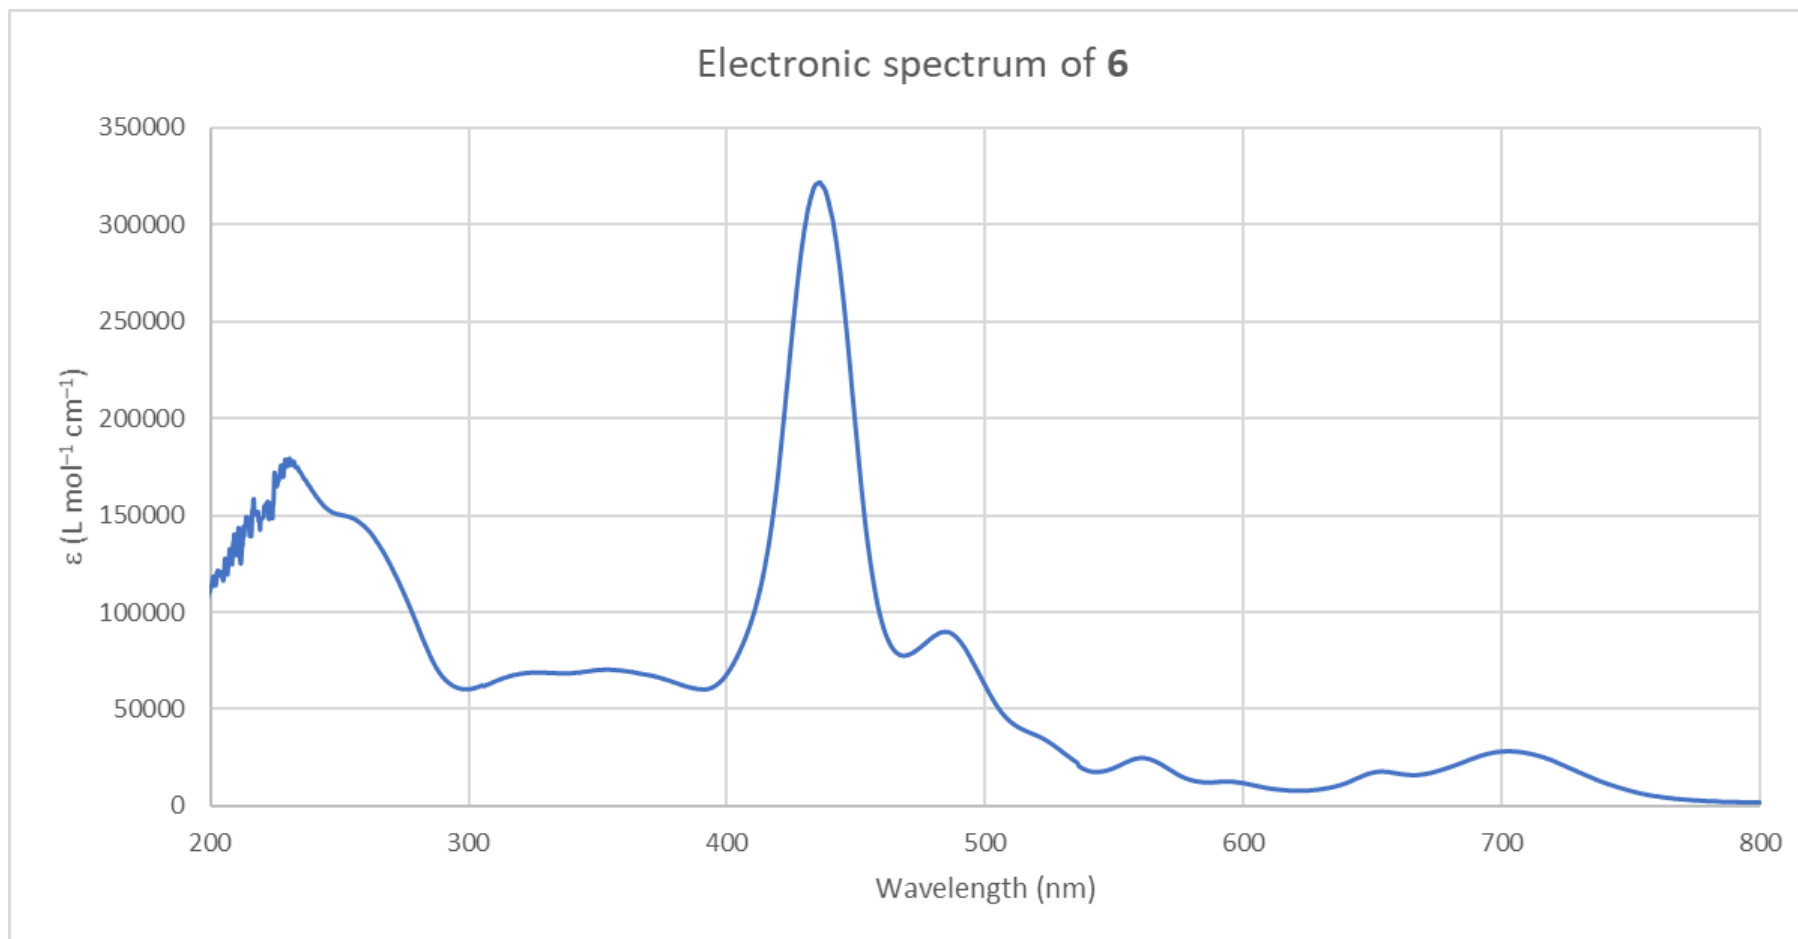

**Figure S55.** Electronic spectrum ( $\text{CH}_2\text{Cl}_2$ ) of **6** ( $8.9 \times 10^{-6} \text{ M}$ ).

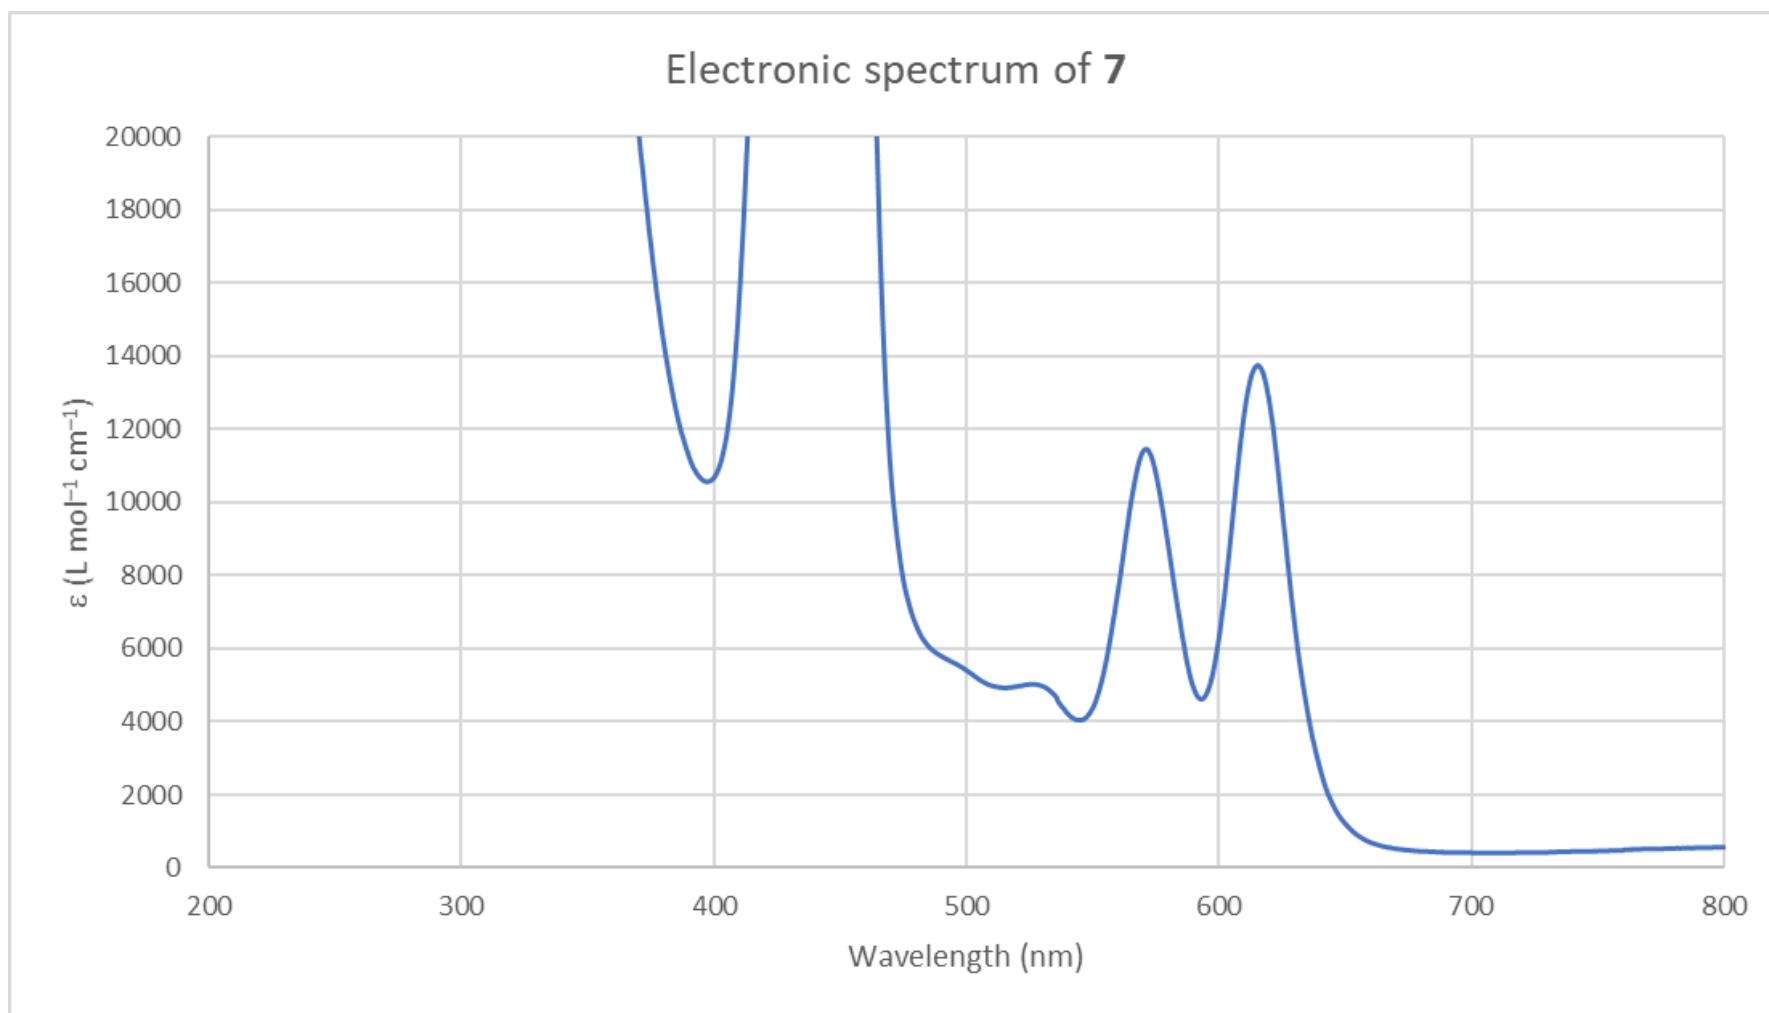

**Figure S56.** Electronic spectrum ( $\text{CH}_2\text{Cl}_2$ ) of **3** ( $1.2 \times 10^{-4} \text{ M}$ ) in the presence of excess 4-dimethylaminopyridine (**7**).



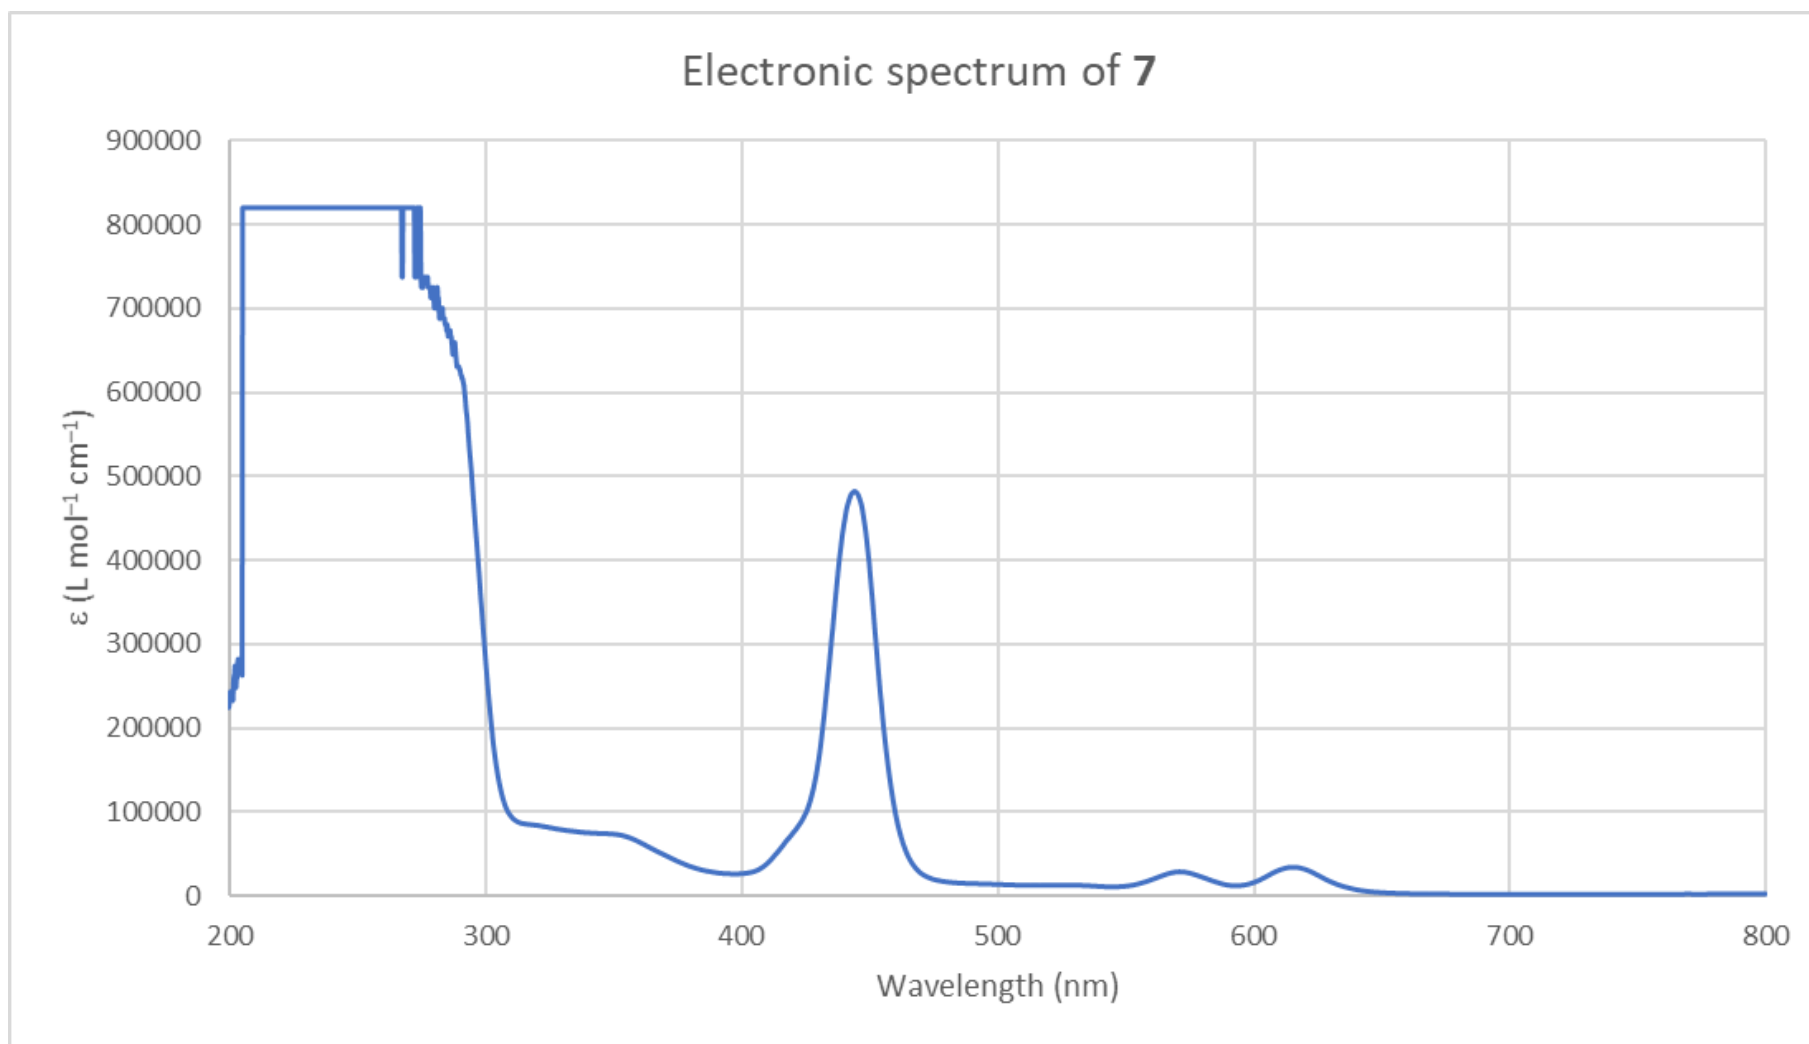

**Figure S57.** Electronic spectrum ( $\text{CH}_2\text{Cl}_2$ ) of **3** ( $6.1 \times 10^{-6} \text{ M}$ ) in the presence of excess 4-dimethylaminopyridine (**7**).

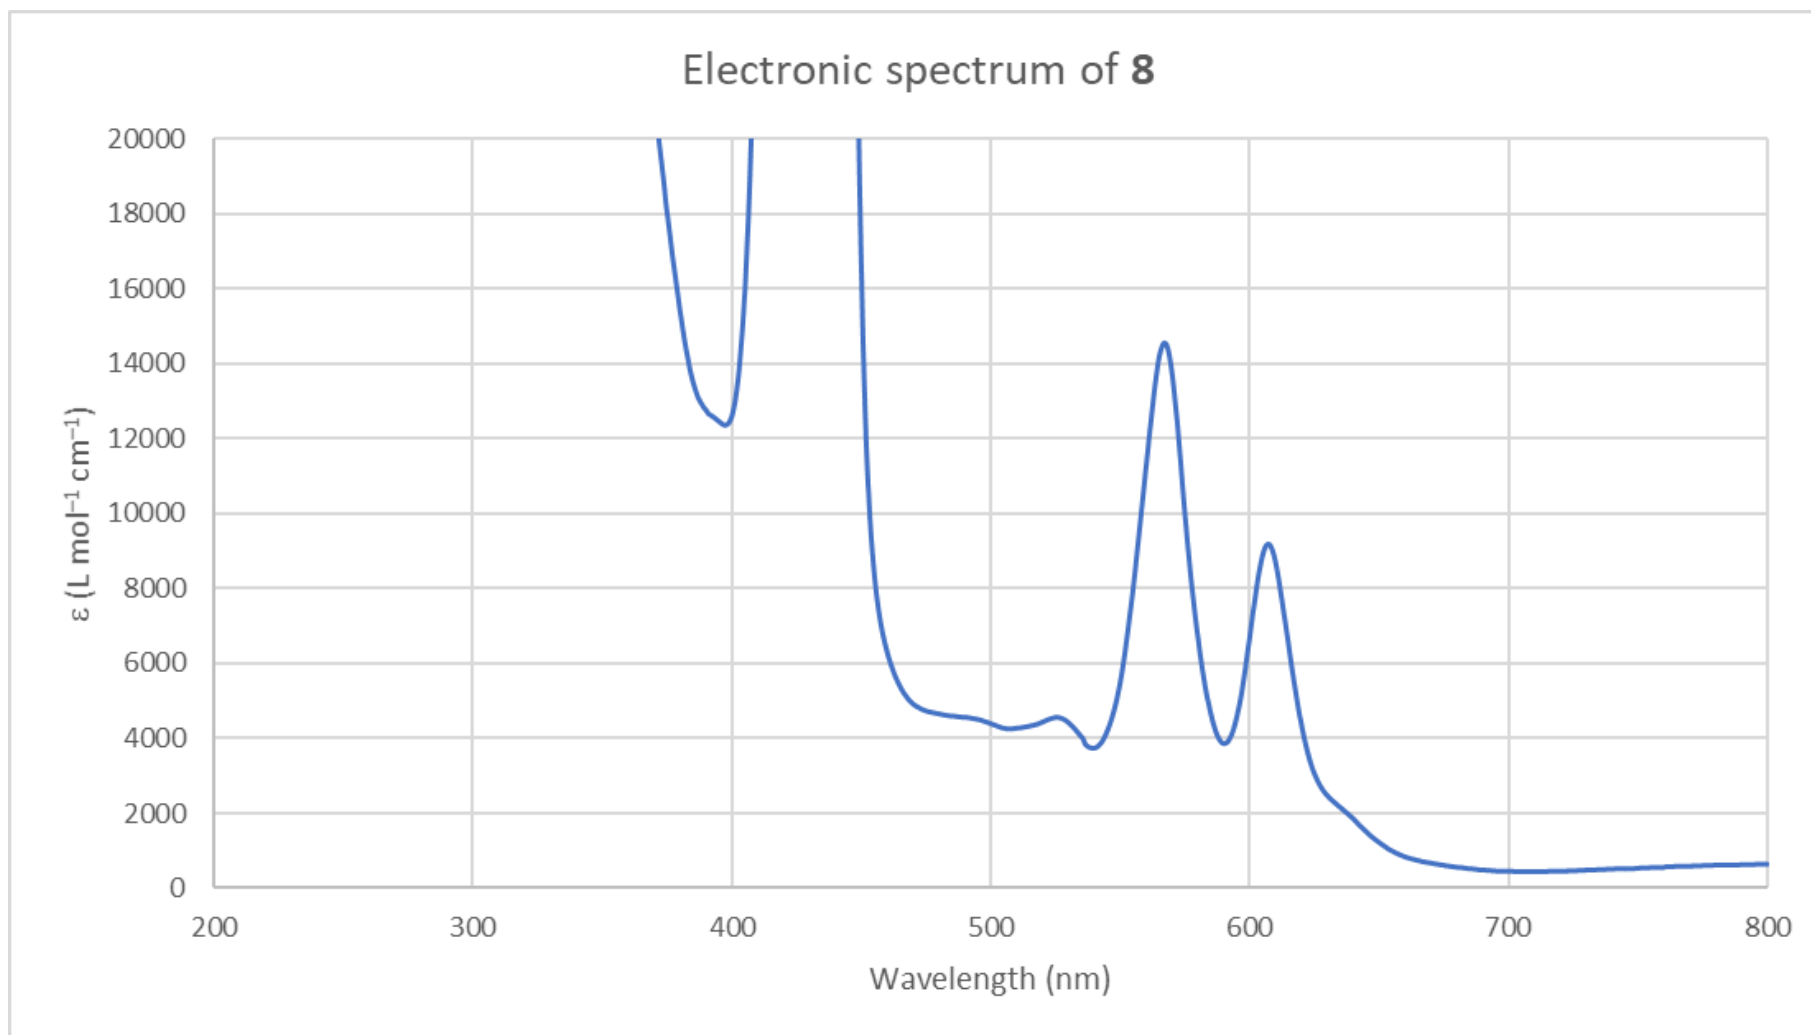

**Figure S58.** Electronic spectrum ( $\text{CH}_2\text{Cl}_2$ ) of **4** ( $1.2 \times 10^{-4} \text{ M}$ ) in the presence of excess 4-dimethylaminopyridine (**8**).

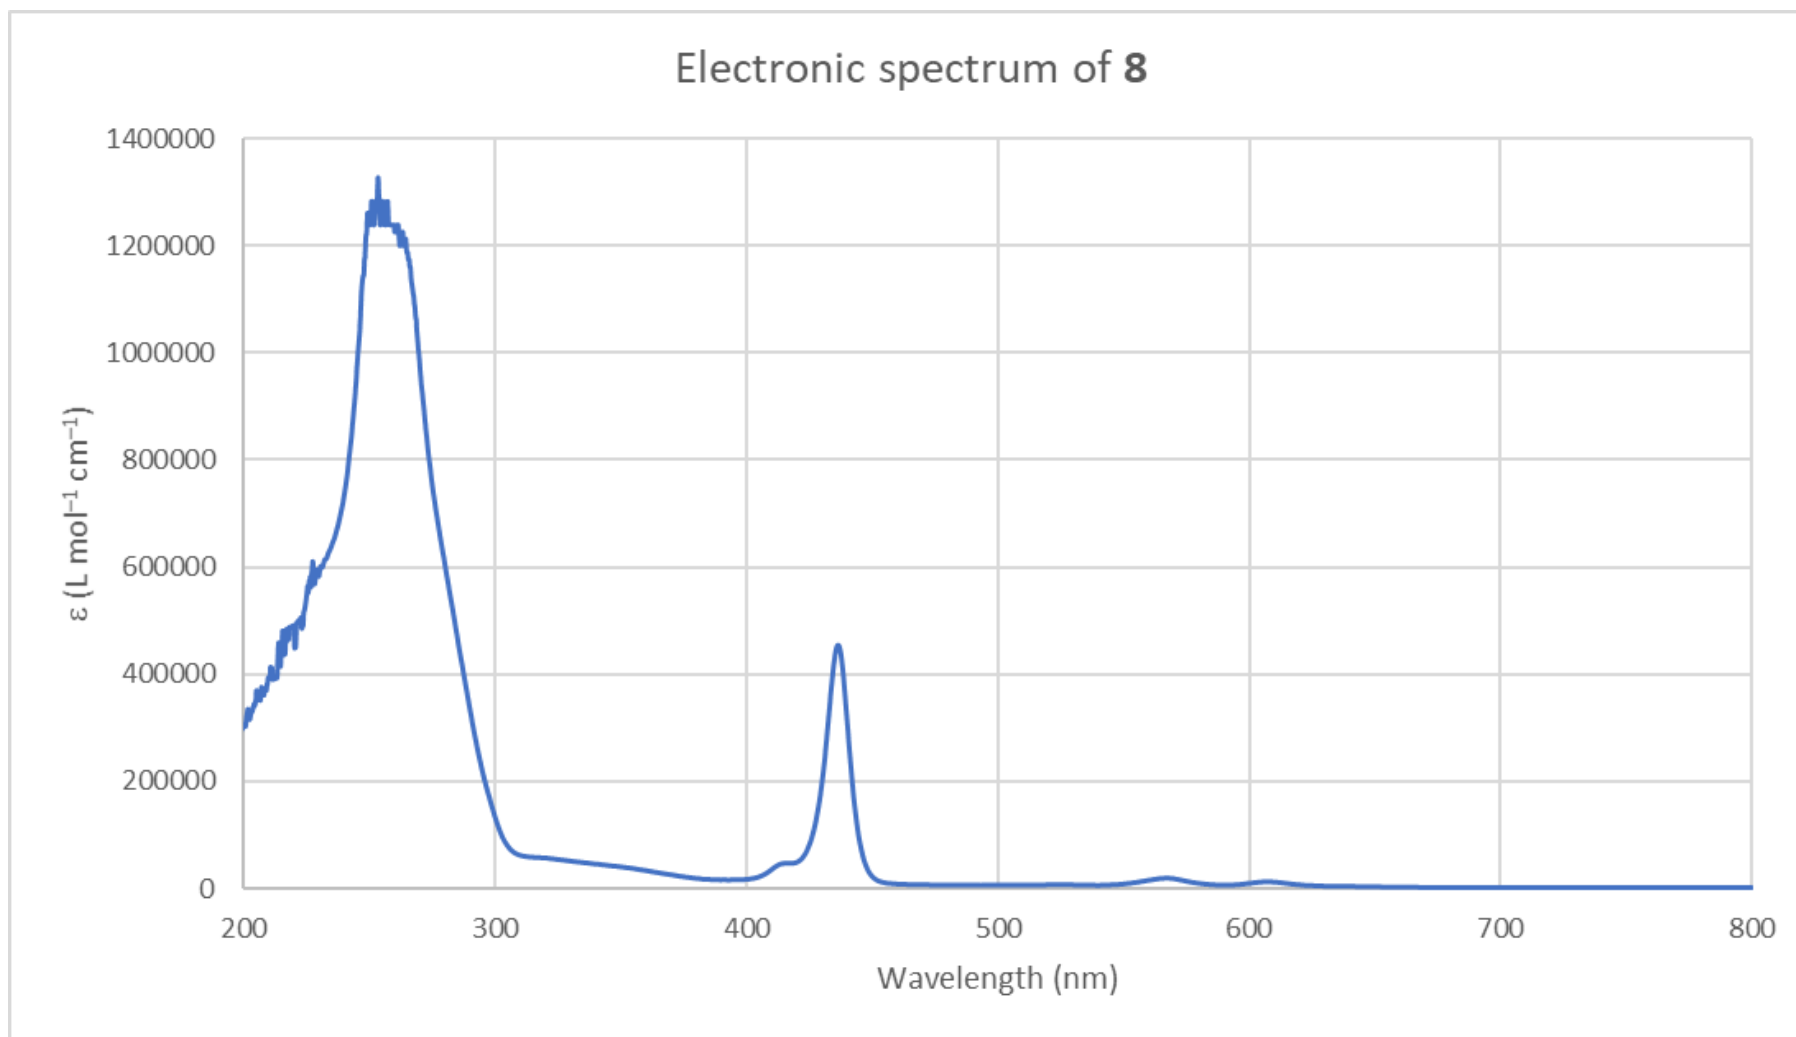

**Figure S59.** Electronic spectrum (CH<sub>2</sub>Cl<sub>2</sub>) of **4** ( $3.4 \times 10^{-6}$  M) in the presence of excess 4-dimethylaminopyridine (**8**).

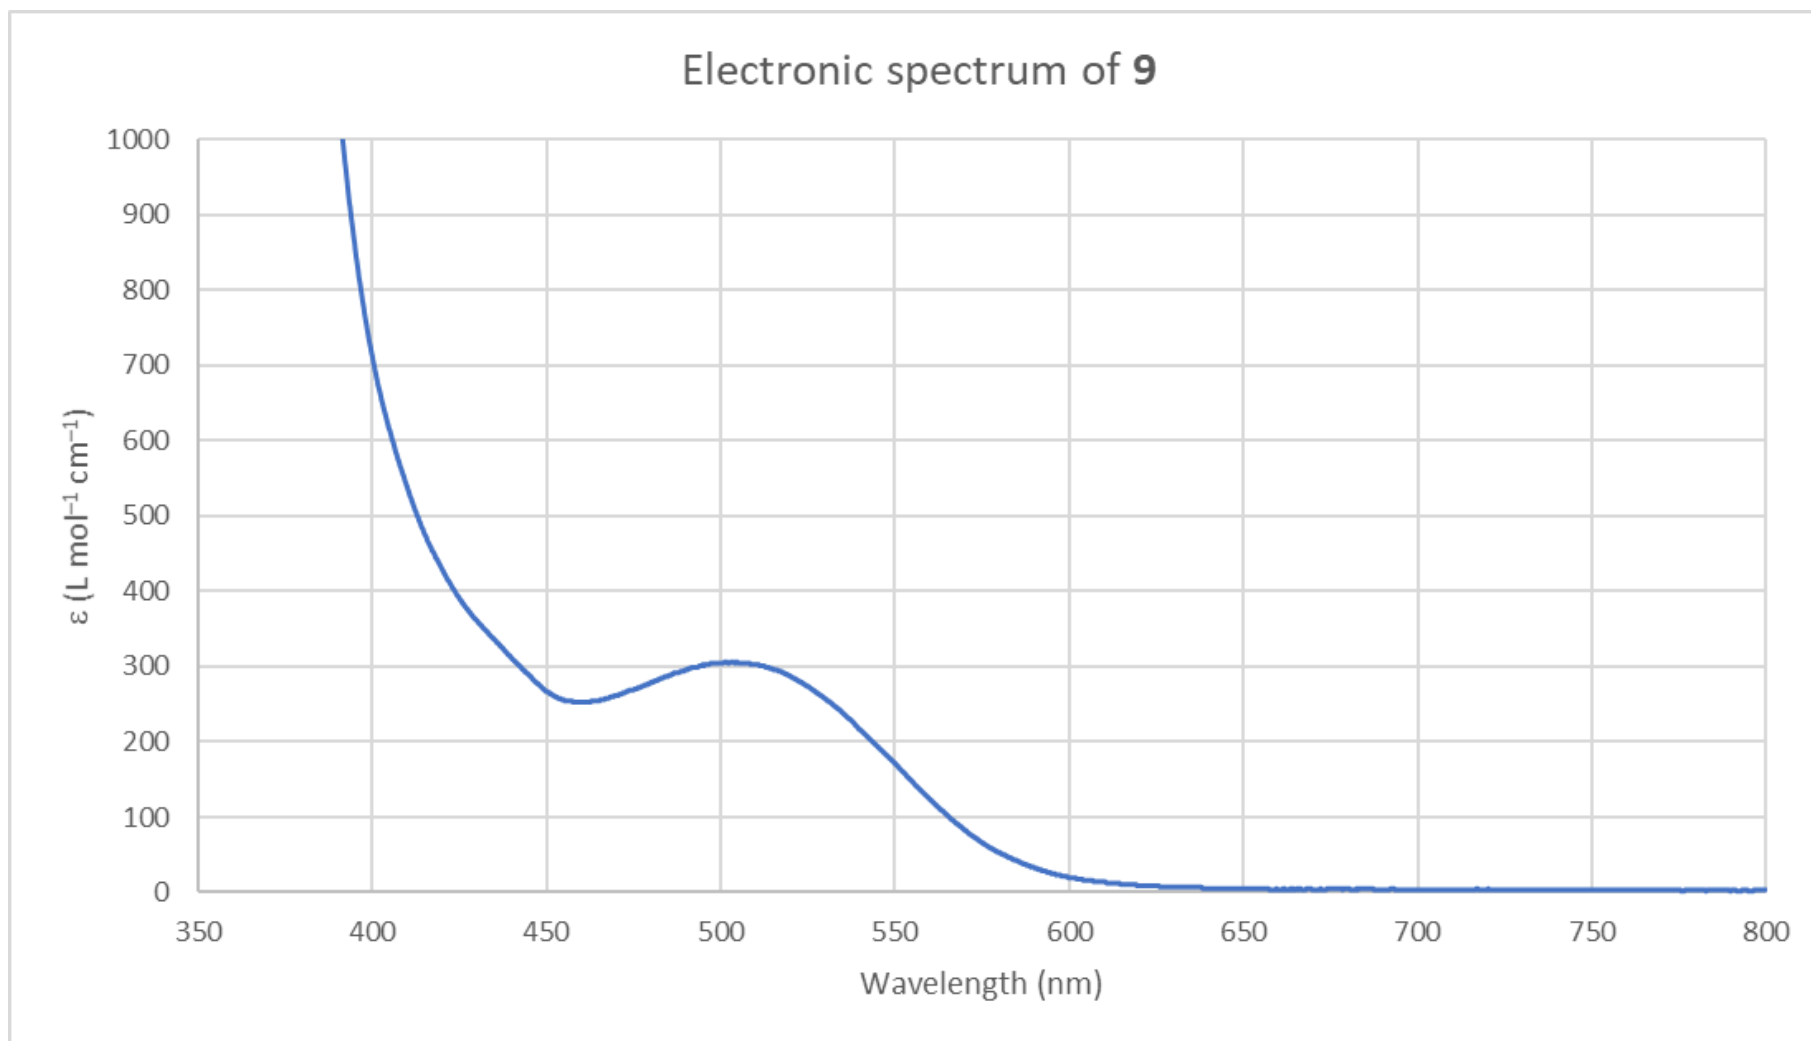

**Figure S60.** Electronic spectrum ( $\text{CH}_2\text{Cl}_2$ ) of **9** ( $5.6 \times 10^{-4} \text{ M}$ ).

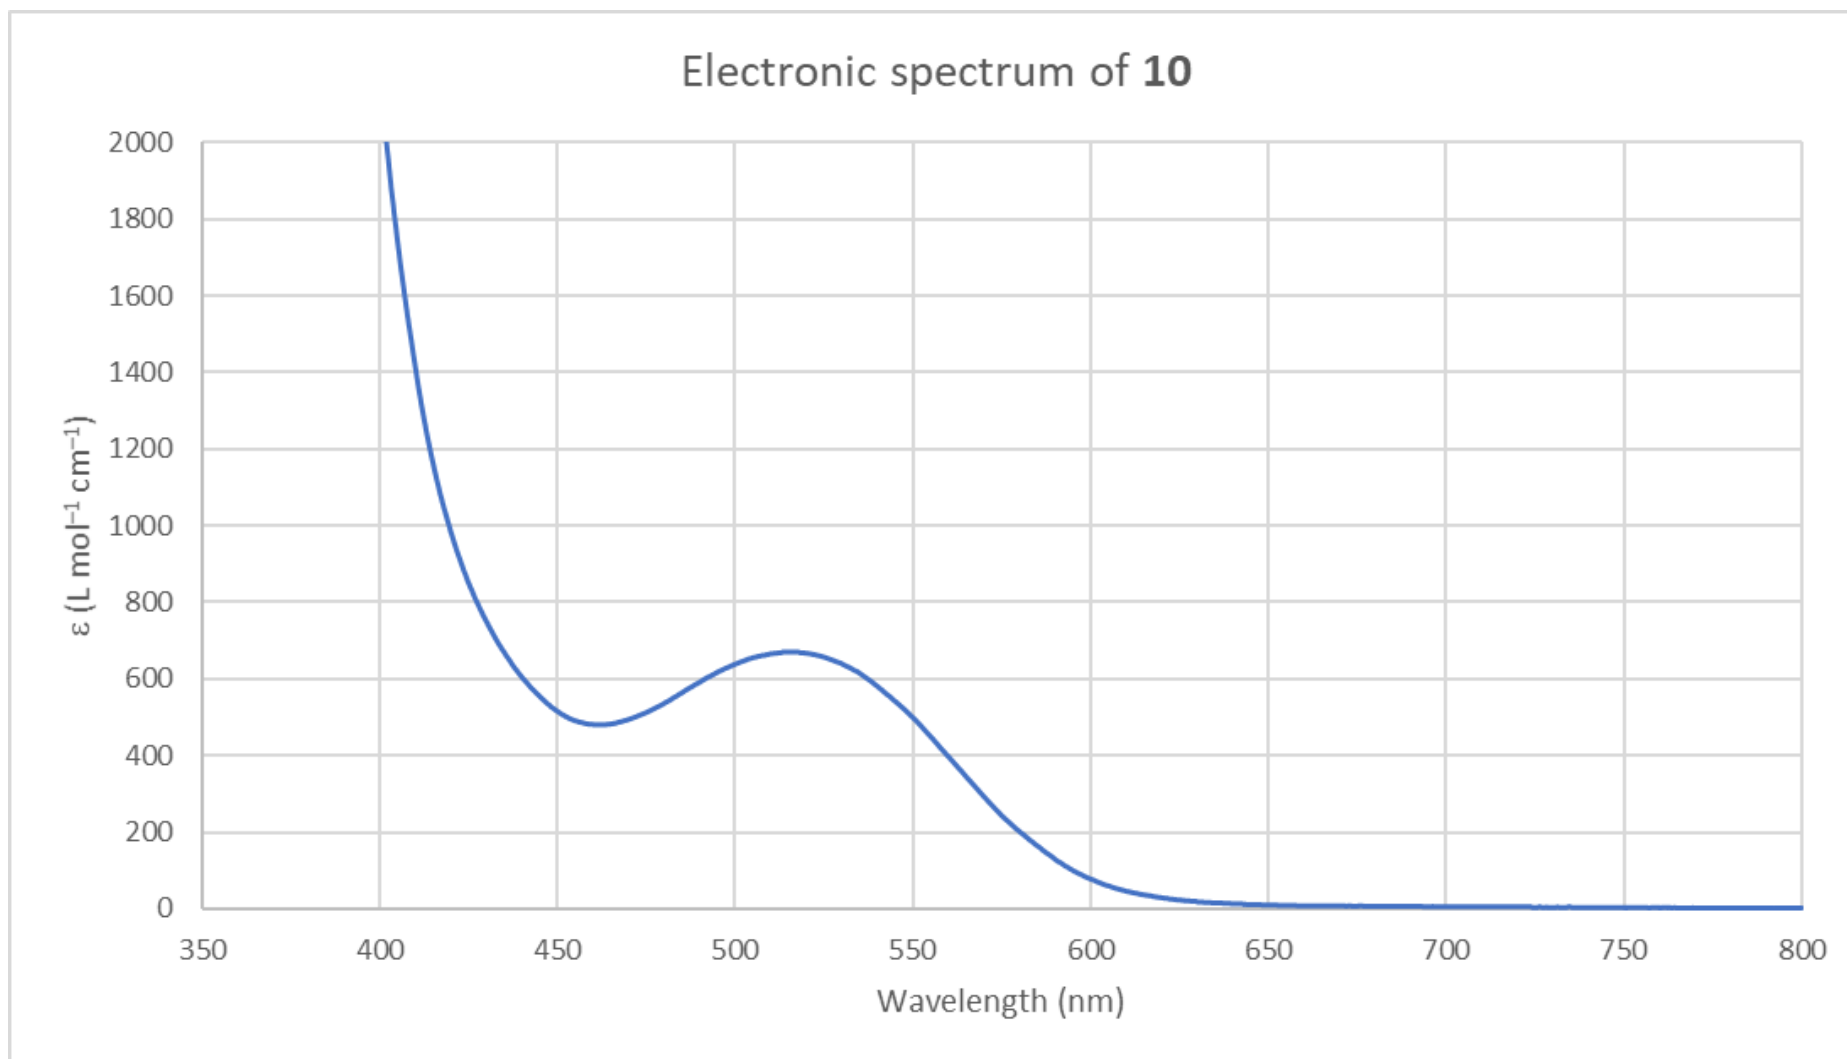

**Figure S61.** Electronic spectrum ( $\text{CH}_2\text{Cl}_2$ ) of **10** ( $7.7 \times 10^{-4} \text{ M}$ ).

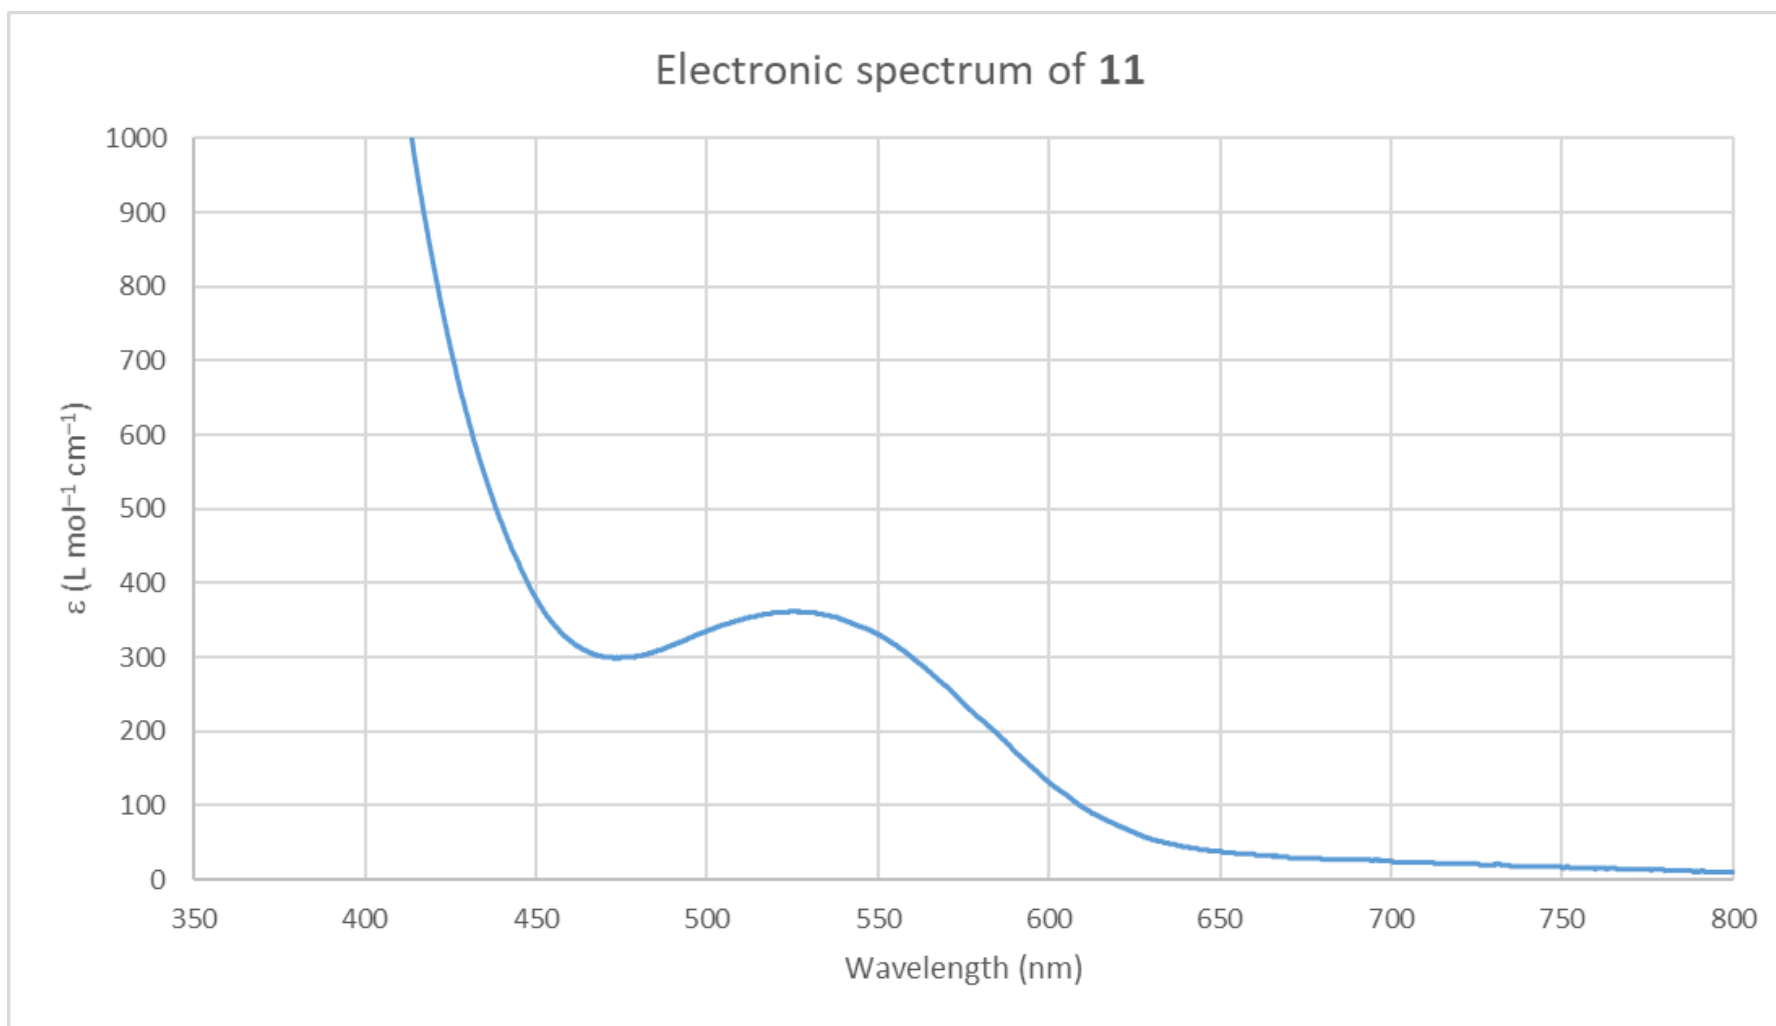

**Figure S62.** Electronic spectrum ( $\text{CH}_2\text{Cl}_2$ ) of **11** ( $5.3 \times 10^{-4} \text{ M}$ ).
